# Supplementary material for: Involvement of MAP3K8 and miR-17-5p in Poor Virologic Response to Interferon-Based Combination Therapy for Chronic Hepatitis C
Source: PLoS One. 2014 May 12;9(5):e97078. doi: 10.1371/journal.pone.0097078 (PMC4018277; doi:10.1371/journal.pone.0097078)
Supplement: Data S3 — List of all gene probe sets up- and down-regulated in sustained virological responders (SVR) and relapsers compared with those in null responders, and gene signatures in previously reported references. (XLS) [file pone.0097078.s009.xls]

## Sheet: Suppl.data-3
Supplementary data 3 List of all gene probe sets up- and down-regulated in sustained virological responders (SVR) and relapsers, compared to null responders,
		and gene signatures in previously reported references.
			Average of expressions			SVR/Relapse vs Null response
Probe set	Symbol	Title	Null	Relapse	SVR	Fold-change	p	FDR	Reference
201909_at	RPS4Y1	ribosomal protein S4, Y-linked 1	9.57664	5.58971	8.80811	0.254293	0.238171	0.750552
202411_at	IFI27	interferon, alpha-inducible protein 27	12.2335	10.7515	10.2813	0.292021	0.046252	0.546206	Sarasin-Filipowicz,.PNAS 2008; Feld, Hepatology 2007
220491_at	HAMP	hepcidin antimicrobial peptide	12.4749	10.9454	10.5973	0.297913	0.0970837	0.625221
205000_at	DDX3Y	DEAD (Asp-Glu-Ala-Asp) box polypeptide 3, Y-linked	6.40886	2.82946	5.8196	0.305542	0.228283	0.744767
204409_s_at	EIF1AY	eukaryotic translation initiation factor 1A, Y-linked	5.69622	2.09675	5.14369	0.308827	0.229416	0.745756
204415_at	IFI6	interferon, alpha-inducible protein 6	12.2316	10.671	10.4929	0.31384	0.0371756	0.521045	Feld, Hepatology 2007
202086_at	MX1	myxovirus (influenza virus) resistance 1, interferon-inducible protein p78 (mouse)	10.4702	8.71795	8.85391	0.314851	0.0296877	0.497263	Chen, Gastroenterology 2005; Feld, Hepatology 2007; Honda, Gastroenterology 2010
205483_s_at	ISG15	ISG15 ubiquitin-like modifier	11.5617	10.1294	9.75773	0.315446	0.0462306	0.546206	Feld, Hepatology 2007
214059_at	IFI44	Interferon-induced protein 44	7.55892	5.81459	5.94623	0.315989	0.00335888	0.352281	Feld, Hepatology 2007; Honda, Gastroenterology 2010
243489_at	---	---	8.06852	6.0025	6.65141	0.31634	0.00241699	0.333109
204439_at	IFI44L	interferon-induced protein 44-like	9.52077	8.33772	7.59668	0.319482	0.0495561	0.55126	Honda, Gastroenterology 2010
242234_at	XAF1	XIAP associated factor 1	7.80949	6.10191	6.3785	0.345148	0.00292558	0.34665	Honda, Gastroenterology 2010
205569_at	LAMP3	lysosomal-associated membrane protein 3	6.87998	5.62421	5.18429	0.346105	0.0305576	0.501769
214777_at	IGKV4-1	immunoglobulin kappa variable 4-1	8.61208	6.66081	7.36232	0.350424	0.00327037	0.349356
226210_s_at	MEG3	maternally expressed 3 (non-protein coding)	5.74529	4.11974	4.34798	0.35777	0.0026768	0.345799
203815_at	GSTT1	glutathione S-transferase theta 1	7.34704	6.64521	5.52759	0.378839	0.292892	0.785418
206561_s_at	AKR1B10	aldo-keto reductase family 1, member B10 (aldose reductase)	5.55482	4.77273	3.84641	0.389303	0.151332	0.686128
242625_at	RSAD2	radical S-adenosyl methionine domain containing 2	7.78194	6.79025	6.25918	0.399533	0.0712955	0.593008	Feld, Hepatology 2007; Honda, Gastroenterology 2010
238876_at	---	---	7.09141	5.41529	5.98733	0.400924	0.00297601	0.34665
1553575_at	---	---	10.5647	9.18666	9.30003	0.404107	0.02289	0.472089
228617_at	XAF1	XIAP associated factor 1	9.89043	8.46493	8.66339	0.405715	0.0155095	0.441581	Honda, Gastroenterology 2010
228492_at	USP9Y	ubiquitin specific peptidase 9, Y-linked	5.34811	2.96836	4.70774	0.408204	0.119386	0.653341
202869_at	OAS1	2',5'-oligoadenylate synthetase 1, 40/46kDa	9.19997	8.43727	7.66968	0.422656	0.0588645	0.572736	Sarasin-Filipowicz. PNAS2008
208937_s_at	ID1	inhibitor of DNA binding 1, dominant negative helix-loop-helix protein	9.72098	8.48835	8.49797	0.427319	0.00822663	0.390817
206133_at	XAF1	XIAP associated factor 1	9.24981	7.8825	8.10949	0.427666	0.0192158	0.458364	Honda, Gastroenterology 2010
218400_at	OAS3	2'-5'-oligoadenylate synthetase 3, 100kDa	8.57265	7.34054	7.36675	0.430556	0.0297137	0.497263	Feld, Hepatology 2007; Honda, Gastroenterology 2010
219352_at	HERC6	hect domain and RLD 6	7.96225	6.94023	6.64812	0.433892	0.0346729	0.512125	Honda, Gastroenterology 2010
206700_s_at	KDM5D	lysine (K)-specific demethylase 5D	6.2281	3.7792	5.77608	0.43502	0.174891	0.708313
239979_at	---	---	7.44124	6.05419	6.35443	0.435457	0.00081053	0.291948
205552_s_at	OAS1	2',5'-oligoadenylate synthetase 1, 40/46kDa	9.06792	8.12283	7.75352	0.442605	0.0543606	0.563155	Sarasin-Filipowicz. PNAS2008
200923_at	LGALS3BP	lectin, galactoside-binding, soluble, 3 binding protein	9.26105	8.15841	8.04968	0.444239	0.0384353	0.524234
220186_s_at	CDHR2	cadherin-related family member 2	8.15114	6.70298	7.15229	0.445241	0.0179188	0.453205
1556499_s_at	COL1A1	collagen, type I, alpha 1	8.74953	6.87332	8.01213	0.446134	0.02462	0.477296
213797_at	RSAD2	radical S-adenosyl methionine domain containing 2	7.53321	6.77031	6.15917	0.452232	0.101189	0.632032	Feld, Hepatology 2007; Honda, Gastroenterology 2010
214453_s_at	IFI44	interferon-induced protein 44	9.60448	8.69842	8.33044	0.455005	0.063881	0.579103	Feld, Hepatology 2007; Honda, Gastroenterology 2010
206548_at	---	---	5.52105	4.08665	4.58747	0.459651	0.000131252	0.291948
204410_at	EIF1AY	eukaryotic translation initiation factor 1A, Y-linked	5.35768	3.01241	4.97911	0.461347	0.232074	0.74766
209291_at	ID4	inhibitor of DNA binding 4, dominant negative helix-loop-helix protein	6.33449	4.79092	5.47979	0.462325	0.0099213	0.403411
230332_at	ZCCHC7	Zinc finger, CCHC domain containing 7	6.6337	5.17739	5.78504	0.474169	0.00471603	0.374434
241897_at	---	---	6.23644	4.95992	5.28273	0.474748	3.04076e-06	0.10389
226702_at	CMPK2	cytidine monophosphate (UMP-CMP) kinase 2, mitochondrial	8.5703	7.88401	7.29748	0.482008	0.142503	0.675653	Honda, Gastroenterology 2010
231597_x_at	---	---	9.49217	7.95637	8.7359	0.48344	0.0212469	0.464739
231455_at	FLJ42418	FLJ42418 protein	4.72217	3.59378	3.73565	0.486421	0.00496029	0.377045
201601_x_at	IFITM1	interferon induced transmembrane protein 1 (9-27)	11.875	10.8928	10.8012	0.486512	0.0365667	0.517785	Feld, Hepatology 2007
213593_s_at	TRA2A	transformer 2 alpha homolog (Drosophila)	7.36068	6.03926	6.4919	0.486825	0.000296228	0.291948
214382_at	UNC93A	unc-93 homolog A (C. elegans)	7.48714	5.76476	6.85964	0.486976	0.124264	0.657789
214022_s_at	IFITM1	interferon induced transmembrane protein 1 (9-27)	11.5903	10.5996	10.5269	0.487645	0.0427922	0.53906	Feld, Hepatology 2007
203153_at	IFIT1	interferon-induced protein with tetratricopeptide repeats 1	10.8082	9.97839	9.65776	0.489647	0.0961108	0.624425	Chen, Gastroenterology 2005; Feld, Hepatology 2007; Honda, Gastroenterology 2010
1569110_x_at	LOC728613	programmed cell death 6 pseudogene	8.03248	7.19541	6.88734	0.489839	0.148117	0.682946
204972_at	OAS2	2'-5'-oligoadenylate synthetase 2, 69/71kDa	7.99014	7.09201	6.9124	0.496413	0.0794382	0.605095	Chen, Gastroenterology 2005; Feld, Hepatology 2007; Honda, Gastroenterology 2010
241891_at	---	---	4.61216	3.38496	3.74314	0.498844	0.000740625	0.291948
238000_at	---	---	6.26496	5.1127	5.3652	0.501927	0.000501432	0.291948
1556761_at	---	---	5.19696	4.08802	4.27361	0.50245	0.000181947	0.291948
235305_s_at	---	---	8.88473	7.47323	8.1501	0.504015	0.00608048	0.386009
1559391_s_at	---	---	4.97105	3.76759	4.11715	0.505232	0.000919654	0.291948
208281_x_at	DAZ1 /// DAZ2 /// DAZ3 /// DAZ4	deleted in azoospermia 1 /// deleted in azoospermia 2 /// deleted in azoospermia 3 /// deleted in azoospermia 4	5.29872	3.66779	4.70609	0.506281	0.0906769	0.617675
242688_at	---	---	6.83524	5.55724	6.03334	0.506827	0.00128941	0.309883
208798_x_at	GOLGA8A	golgin A8 family, member A	7.63623	6.21469	6.93671	0.510407	0.018647	0.455807
1564378_a_at	---	---	7.28543	6.22546	6.37454	0.511639	0.000777911	0.291948
240988_x_at	---	---	8.6718	7.44827	7.85947	0.511735	0.00328228	0.349356
242471_at	---	---	5.68598	4.44263	4.89378	0.513564	0.000662209	0.291948
231598_x_at	---	---	7.11529	5.78078	6.3869	0.515595	0.0197469	0.459274
227609_at	EPSTI1	epithelial stromal interaction 1 (breast)	9.20715	8.47521	8.12824	0.518063	0.0714843	0.593025	Honda, Gastroenterology 2010
232889_at	---	---	7.22538	5.94623	6.47844	0.518884	0.0042691	0.366494
202310_s_at	COL1A1	collagen, type I, alpha 1	5.45187	4.11065	4.74648	0.519853	0.0121845	0.415577
223646_s_at	CYorf15B	chromosome Y open reading frame 15B	5.31952	3.64588	4.81659	0.52053	0.112495	0.646511
232375_at	---	---	6.69931	5.48243	5.93956	0.524433	0.0023982	0.333109
233393_at	---	---	4.88063	3.79663	4.04244	0.524722	0.00271828	0.345799
219211_at	USP18	ubiquitin specific peptidase 18	8.03568	7.34572	6.9652	0.525663	0.0195944	0.458933	Sarasin-Filipowicz, PNAS 2008; Chen, Gastroenterology 2005; Feld, Hepatology 2007; Honda, Gastroenterology 2010
231956_at	RNF213	ring finger protein 213	6.0357	4.72455	5.33972	0.526073	0.0146022	0.433674
209969_s_at	STAT1	signal transducer and activator of transcription 1, 91kDa	9.14996	7.86635	8.43785	0.526161	0.0733343	0.596322	Sarasin-Filipowicz, PNAS 2008; Feld, Hepatology 2007
1556658_a_at	---	---	5.31366	4.33965	4.45175	0.534422	0.000777992	0.291948
242121_at	NCRNA00182	non-protein coding RNA 182	8.4491	7.22078	7.73989	0.53445	0.00305344	0.34665
235592_at	---	---	6.33702	5.09703	5.63518	0.534533	0.0832908	0.609045
239946_at	---	---	6.37346	5.08095	5.7035	0.534618	0.0196291	0.458933
232174_at	---	---	7.92172	6.93471	7.07726	0.53666	0.00787291	0.389823
233314_at	PTEN	phosphatase and tensin homolog	4.49352	3.33744	3.75332	0.537318	0.00354436	0.356345
227576_at	---	---	7.65414	6.4069	6.97437	0.538653	0.00770852	0.389823
223235_s_at	SMOC2	SPARC related modular calcium binding 2	4.82827	3.91298	3.9506	0.53895	0.0082466	0.390817
240499_at	---	---	5.33854	3.92145	4.76895	0.540588	0.00831089	0.390817
202404_s_at	COL1A2	collagen, type I, alpha 2	7.07409	5.92665	6.34855	0.541956	0.00413147	0.364623
235693_at	---	---	6.01998	5.04634	5.19216	0.542425	0.0042235	0.366494
239726_at	---	---	5.36088	4.28321	4.60164	0.543876	0.00825686	0.390817
235123_at	---	---	7.12735	6.15527	6.30934	0.544959	0.00599958	0.386009
236404_at	---	---	5.36475	4.35862	4.57705	0.547293	0.000997613	0.291948
204606_at	CCL21	chemokine (C-C motif) ligand 21	7.47799	6.32847	6.78173	0.548579	0.0805044	0.607311
215635_at	---	---	4.75399	3.66212	4.02515	0.549056	1.84085e-05	0.264799
236621_at	RPS27	ribosomal protein S27	5.48799	4.55608	4.66838	0.550294	0.00298988	0.34665
244860_at	---	---	4.4586	3.47994	3.66787	0.550491	0.00820997	0.390817
210072_at	CCL19	chemokine (C-C motif) ligand 19	8.65133	7.25871	8.10951	0.550622	0.238484	0.750552
201792_at	AEBP1	AE binding protein 1	7.46888	6.37873	6.74726	0.551021	0.00227831	0.333109
235847_at	---	---	6.57119	5.5653	5.80297	0.551969	0.00108086	0.297811
214236_at	LOC100286895	Similar to cell division cycle protein 27	6.0344	4.94924	5.3235	0.554303	0.0123705	0.415577
228623_at	---	---	5.64984	4.50177	4.97828	0.554688	0.0101882	0.403411
223587_s_at	AMN	amnionless homolog (mouse)	5.74697	4.67073	5.03446	0.555205	0.052312	0.557657
229302_at	TMEM178	transmembrane protein 178	6.54304	5.39495	5.87497	0.555526	0.000268576	0.291948
201842_s_at	EFEMP1	EGF-containing fibulin-like extracellular matrix protein 1	6.91178	5.94529	6.13865	0.556463	0.00931907	0.397444
243012_at	---	---	6.00922	4.85617	5.35341	0.557765	0.0196657	0.458933
232311_at	B2M	Beta-2-microglobulin	6.46019	5.36418	5.77137	0.558058	0.00208939	0.333109
237310_at	---	---	7.18024	6.17609	6.4366	0.55813	0.00519224	0.383979
227501_at	---	---	6.2514	5.09487	5.59997	0.558318	0.000718151	0.291948
226587_at	SNRPN	small nuclear ribonucleoprotein polypeptide N	4.99744	4.11786	4.18049	0.558475	0.00183381	0.32523
244597_at	SPATS2L	Spermatogenesis associated, serine-rich 2-like	5.50943	4.65859	4.68615	0.561119	0.00131681	0.309883
241681_at	---	---	7.4091	6.18772	6.80899	0.561329	0.0132079	0.420718
221978_at	HLA-F	major histocompatibility complex, class I, F	7.27508	6.16126	6.61131	0.56154	0.0129323	0.417143
226211_at	MEG3	maternally expressed 3 (non-protein coding)	5.14229	4.26554	4.33818	0.562001	0.00685803	0.389823
217497_at	TYMP	thymidine phosphorylase	5.50285	4.48918	4.78108	0.562047	0.00707339	0.389823
232453_at	---	---	6.61753	5.59938	5.89905	0.562197	0.00222159	0.333109
239723_at	---	---	6.66949	5.81676	5.85769	0.563639	0.000386121	0.291948
239162_at	---	---	5.53149	4.41932	4.87942	0.564635	0.00884905	0.396163
1556735_at	---	---	5.97098	5.2417	5.0925	0.56545	0.0235412	0.472089
216491_x_at	IGHM	immunoglobulin heavy constant mu	6.90796	5.90986	6.1915	0.565626	0.125983	0.65958
216351_x_at	DAZ1 /// DAZ2 /// DAZ3 /// DAZ4	deleted in azoospermia 1 /// deleted in azoospermia 2 /// deleted in azoospermia 3 /// deleted in azoospermia 4	5.24577	3.91609	4.74062	0.568663	0.109681	0.643542
232541_at	---	---	7.62424	6.46383	7.01942	0.569132	0.0226791	0.471035
216922_x_at	DAZ1 /// DAZ2 /// DAZ3 /// DAZ4	deleted in azoospermia 1 /// deleted in azoospermia 2 /// deleted in azoospermia 3 /// deleted in azoospermia 4	5.5556	4.13235	5.11133	0.569835	0.137681	0.670563
203571_s_at	C10orf116	chromosome 10 open reading frame 116	8.37286	7.51896	7.58824	0.570144	0.105287	0.638399
238883_at	---	---	6.09902	4.96695	5.48432	0.57089	0.00706129	0.389823
219684_at	RTP4	receptor (chemosensory) transporter protein 4	7.96475	7.29249	7.07612	0.571374	0.0793325	0.605095
225540_at	MAP2	microtubule-associated protein 2	5.92123	5.06011	5.14749	0.571764	0.0138415	0.427198
232210_at	---	---	6.518	5.41712	5.88935	0.572069	0.00683189	0.389823
240120_at	---	---	7.3554	6.21531	6.75611	0.573516	0.0467213	0.546206
239842_x_at	---	---	5.76167	4.72993	5.10462	0.575323	0.00024106	0.291948
1559117_at	---	---	6.16453	5.17336	5.4836	0.575438	0.00392364	0.361852
205547_s_at	TAGLN	transgelin	6.58216	5.60951	5.89051	0.575536	0.10128	0.632328
235276_at	EPSTI1	epithelial stromal interaction 1 (breast)	6.76249	5.91505	5.99667	0.575774	0.0991122	0.62825	Honda, Gastroenterology 2010
226474_at	NLRC5	NLR family, CARD domain containing 5	6.59689	5.52006	5.9702	0.576148	0.0201697	0.460314
216576_x_at	IGK@ /// IGKC /// LOC652493 /// LOC652694	immunoglobulin kappa locus /// immunoglobulin kappa constant /// similar to Ig kappa chain V-I region HK102 precursor /// similar to Ig kappa chain V-I region HK102 precursor	8.03684	7.0384	7.36334	0.576202	0.12511	0.658432
237483_at	---	---	5.82937	5.03582	5.03357	0.576362	0.0026857	0.345799
211643_x_at	IGK@ /// IGKC /// IGKV3D-15	immunoglobulin kappa locus /// immunoglobulin kappa constant /// immunoglobulin kappa variable 3D-15 (gene/pseudogene)	8.33168	7.07489	7.81533	0.576736	0.154257	0.690198
232431_at	---	---	5.55028	4.82156	4.71922	0.577268	0.00247896	0.337435
239811_at	---	---	5.87327	4.95719	5.15598	0.577609	0.00113844	0.301518
214079_at	DHRS2	dehydrogenase/reductase (SDR family) member 2	7.17751	7.14366	5.93822	0.579449	0.338834	0.811286
202291_s_at	MGP	matrix Gla protein	8.03835	7.27841	7.2349	0.579497	0.0251977	0.479879
242932_at	---	---	6.22531	5.02964	5.6852	0.579973	0.00880687	0.396163
215269_at	TRAPPC10	trafficking protein particle complex 10	5.64799	4.66605	4.98497	0.581313	0.00132458	0.309883
238558_at	---	---	5.46539	4.45723	4.81898	0.581533	0.00175312	0.32523
201641_at	BST2	bone marrow stromal cell antigen 2	9.88431	9.37311	8.94154	0.58199	0.0726715	0.595906
1565598_at	---	---	5.43487	4.45714	4.7723	0.582065	0.000420244	0.291948
225899_x_at	FLJ45340 /// FLJ45445 /// LOC100133150 /// LOC100133161 /// LOC100287274 /// LOC653340	hypothetical LOC402483 /// hypothetical LOC399844 /// hypothetical LOC100133150 /// hypothetical LOC100133161 /// hypothetical LOC100287274 /// hypothetical LOC653340	7.26134	5.8449	6.86283	0.582271	0.0160443	0.446392
213575_at	TRA2A	transformer 2 alpha homolog (Drosophila)	5.37407	4.40009	4.7136	0.583159	0.000186737	0.291948
242431_at	---	---	5.31233	4.21248	4.7274	0.583165	0.00215038	0.333109
220512_at	DLC1	deleted in liver cancer 1	5.5279	4.61347	4.83323	0.583547	0.0255607	0.483009
230462_at	NUMB	numb homolog (Drosophila)	4.74224	3.58146	4.19988	0.584684	0.00547543	0.384042
206857_s_at	FKBP1B	FK506 binding protein 1B, 12.6 kDa	5.77411	4.67383	5.19868	0.585504	0.0678797	0.587247
213872_at	C6orf62	Chromosome 6 open reading frame 62	8.67387	7.69625	8.0259	0.58577	0.00616314	0.386602
239860_at	LOC100130232	LP2209	9.47208	8.43306	8.86122	0.58584	0.0271279	0.487367
209480_at	HLA-DQB1	major histocompatibility complex, class II, DQ beta 1	5.98485	4.8643	5.4275	0.58701	0.471657	0.867578
221899_at	N4BP2L2	NEDD4 binding protein 2-like 2	8.91876	7.79989	8.36294	0.587652	0.0115085	0.411727
236931_at	---	---	5.60363	4.59447	4.98202	0.587663	0.000461288	0.291948
243256_at	MKNK1	MAP kinase interacting serine/threonine kinase 1	6.40024	5.38393	5.78366	0.587849	0.011658	0.412327
225636_at	STAT2	signal transducer and activator of transcription 2, 113kDa	10.1351	9.10578	9.52802	0.588274	0.00233693	0.333109
239448_at	---	---	4.86536	3.92121	4.20765	0.5884	0.00252023	0.340341
234764_x_at	IGLV1-44	Immunoglobulin lambda variable 1-44	7.28617	6.01753	6.82883	0.589851	0.192273	0.718393
221875_x_at	HLA-F	major histocompatibility complex, class I, F	11.4243	10.405	10.8197	0.590436	0.0377231	0.522967
235803_at	---	---	5.24046	4.22522	4.6342	0.590649	0.000317647	0.291948
232773_at	---	---	5.04232	4.143	4.36776	0.59097	0.00637964	0.389823
236798_at	---	---	6.66874	6.30424	5.67567	0.591582	0.0434768	0.539573
222371_at	---	---	6.36625	5.39552	5.73726	0.59167	0.00236475	0.333109
204747_at	IFIT3	interferon-induced protein with tetratricopeptide repeats 3	8.93959	8.33456	8.09769	0.593338	0.0784205	0.603857	Feld, Hepatology 2007
213089_at	LOC100272216	hypothetical LOC100272216	7.54938	6.52019	6.96258	0.593496	0.00419418	0.365557
240666_at	---	---	5.5945	4.65587	4.95665	0.594338	0.00558423	0.384042
240452_at	GSPT1	G1 to S phase transition 1	5.92994	4.87265	5.36645	0.595154	0.00260012	0.345664
217022_s_at	IGH@ /// IGHA1 /// IGHA2 /// LOC100126583	immunoglobulin heavy locus /// immunoglobulin heavy constant alpha 1 /// immunoglobulin heavy constant alpha 2 (A2m marker) /// hypothetical LOC100126583	8.7021	7.73526	8.08757	0.595984	0.0322688	0.509013
242990_at	---	---	4.79976	3.64895	4.29581	0.59604	0.00499134	0.377288
227663_at	---	---	7.34156	6.39318	6.71646	0.596117	0.0269914	0.486644
217148_x_at	LOC100293440	similar to Ig lambda chain	8.90628	7.59902	8.49791	0.59648	0.163115	0.700118
235023_at	VPS13C	Vacuolar protein sorting 13 homolog C (S. cerevisiae)	6.45044	5.46956	5.85202	0.597977	0.00854238	0.392812
243561_at	---	---	6.1808	5.36802	5.48182	0.598052	0.00406372	0.363348
222336_at	C4orf34	chromosome 4 open reading frame 34	5.62019	4.71908	4.97424	0.598058	0.00179959	0.32523
214657_s_at	NEAT1	nuclear paraspeckle assembly transcript 1 (non-protein coding)	5.45117	4.35334	4.92452	0.598389	0.0122862	0.415577
201496_x_at	MYH11	myosin, heavy chain 11, smooth muscle	5.34983	4.18413	4.86411	0.598441	0.323904	0.803668
235701_at	---	---	6.37737	5.30642	5.84238	0.600411	0.0120283	0.415577
215206_at	---	---	6.62676	5.87792	5.89946	0.600662	0.00113419	0.301518
214768_x_at	---	---	8.69323	7.69658	8.11483	0.600718	0.106111	0.639244
200696_s_at	GSN	gelsolin	9.25041	8.58884	8.47306	0.601263	0.0491814	0.551123
232500_at	RALGAPA2	Ral GTPase activating protein, alpha subunit 2 (catalytic)	7.26163	6.44197	6.5816	0.601903	0.00472469	0.374434
1558922_at	---	---	4.37662	3.49862	3.73188	0.601981	0.00163292	0.32523
213605_s_at	---	---	8.5972	7.49276	8.08944	0.602272	0.012859	0.417143
242143_at	---	---	6.32577	5.47391	5.6675	0.602541	0.00360388	0.356345
242074_at	---	---	6.55416	5.58635	5.9669	0.602917	0.000720589	0.291948
241905_at	PIK3C2A	Phosphoinositide-3-kinase, class 2, alpha polypeptide	5.40939	4.4551	4.81632	0.603517	0.00476537	0.374434
1562669_at	---	---	5.22799	4.52691	4.48365	0.603689	0.00707732	0.389823
204806_x_at	HLA-F	major histocompatibility complex, class I, F	11.3776	10.4184	10.7889	0.603913	0.0483302	0.550318
235493_at	---	---	5.83421	5.07653	5.12622	0.604317	0.00157254	0.32523
201839_s_at	EPCAM	epithelial cell adhesion molecule	6.69399	5.37084	6.32864	0.605197	0.16435	0.701407
242824_at	---	---	7.62858	6.5808	7.09907	0.605476	0.0161724	0.447099
209875_s_at	SPP1	secreted phosphoprotein 1	7.05129	6.26034	6.36808	0.605578	0.25217	0.760625
239757_at	ZFAND6	Zinc finger, AN1-type domain 6	6.0429	5.13486	5.43113	0.605889	0.00632988	0.389823
218543_s_at	PARP12	poly (ADP-ribose) polymerase family, member 12	7.874	7.08759	7.1898	0.606036	0.0495556	0.55126
230229_at	DLG1	Discs, large homolog 1 (Drosophila)	6.46096	5.46941	5.90043	0.606186	0.0186377	0.455807
241391_at	---	---	5.49983	4.52145	4.9321	0.606372	0.00307368	0.34665
242008_at	---	---	5.073	4.09839	4.50653	0.607301	0.00785488	0.389823
226435_at	PAPLN	papilin, proteoglycan-like sulfated glycoprotein	4.52484	3.50116	3.98987	0.607837	0.0146628	0.434314
202403_s_at	COL1A2	collagen, type I, alpha 2	8.31803	7.302	7.78213	0.608804	0.0195288	0.458933
232882_at	---	---	6.05213	5.01321	5.53057	0.608964	0.0361736	0.517785
238712_at	---	---	5.49184	4.61859	4.876	0.61032	0.00186829	0.325674
231212_x_at	---	---	7.89202	7.05619	7.25445	0.610511	0.0023825	0.333109
243618_s_at	ZNF827	Zinc finger protein 827	4.69959	3.81881	4.09129	0.611118	0.00225186	0.333109
242550_at	EIF3B	eukaryotic translation initiation factor 3, subunit B	4.83872	3.91402	4.25685	0.611139	0.000908786	0.291948
229450_at	IFIT3	interferon-induced protein with tetratricopeptide repeats 3	10.319	9.79365	9.498	0.61127	0.125077	0.658432	Feld, Hepatology 2007
1559425_at	---	---	5.5843	4.68466	4.98808	0.611317	0.00350619	0.356345
211470_s_at	SULT1C2	sulfotransferase family, cytosolic, 1C, member 2	3.62354	2.87756	2.93604	0.61156	0.0406848	0.535479
232710_at	---	---	5.61724	4.67967	5.04603	0.611916	0.000519151	0.291948
1560342_at	---	---	4.68568	3.78761	4.09098	0.611971	0.0196838	0.458933
233599_at	LOC728061	hCG2003663	5.84515	4.79564	5.34159	0.612046	0.0499498	0.552451
1561167_at	---	---	3.37389	2.45911	2.78954	0.612059	0.000148997	0.291948
1568638_a_at	IDO2	indoleamine 2,3-dioxygenase 2	7.74539	7.26191	6.90289	0.612226	0.135275	0.668988
201649_at	UBE2L6	ubiquitin-conjugating enzyme E2L 6	9.98458	9.29333	9.26676	0.61223	0.0797878	0.605603
241956_at	---	---	5.15099	4.42682	4.45304	0.612259	0.000171449	0.291948
238549_at	CBFA2T2	core-binding factor, runt domain, alpha subunit 2; translocated to, 2	6.61804	5.66265	6.06018	0.612622	0.00309968	0.34665
243015_at	CYP3A5	Cytochrome P450, family 3, subfamily A, polypeptide 5	5.18113	4.61956	4.38771	0.612817	0.18148	0.712072
242068_at	---	---	6.52942	5.49472	6.02098	0.613108	0.020898	0.463112
217164_at	---	---	6.32134	5.24939	5.8379	0.61381	0.00558788	0.384042
242733_at	---	---	6.48408	5.65289	5.85652	0.613904	0.0046861	0.374434
219209_at	IFIH1	interferon induced with helicase C domain 1	7.51337	6.95629	6.72158	0.613963	0.103378	0.636527	Honda, Gastroenterology 2010
239409_at	---	---	5.54152	4.67093	4.93871	0.614198	0.00151124	0.32523
242725_at	---	---	6.70183	5.73468	6.15917	0.614787	0.0043753	0.369611
215470_at	GTF2H2B	general transcription factor IIH, polypeptide 2B	5.90286	5.05226	5.29044	0.61483	0.0257345	0.483009
1556007_s_at	---	---	6.52763	5.73799	5.87916	0.614973	0.0159538	0.445963
223645_s_at	CYorf15B	chromosome Y open reading frame 15B	4.85965	3.82255	4.361	0.615328	0.111844	0.644726
229858_at	---	---	6.63159	5.73173	6.05157	0.61559	0.00131963	0.309883
233130_at	---	---	6.31094	5.58654	5.6271	0.615975	0.0211054	0.464097
1562440_at	MAP3K13	Mitogen-activated protein kinase kinase kinase 13	5.37041	4.37742	4.84827	0.616125	0.00476806	0.374434
237737_at	LOC100289026	similar to hCG1744891	6.58697	5.74374	5.97725	0.616733	0.0511809	0.555648
242705_x_at	LOC100289219	similar to hCG1981348	6.70304	5.5747	6.2645	0.61676	0.0224368	0.471035
1557543_at	---	---	5.23592	4.39548	4.62551	0.616994	0.0214848	0.467402
229364_at	LOC646870	hypothetical protein LOC646870	5.69735	4.85433	5.0886	0.617024	0.00234961	0.333109
202177_at	GAS6	growth arrest-specific 6	6.65508	5.9109	5.98794	0.617265	0.00665791	0.389823
235094_at	---	---	5.1785	4.12998	4.69648	0.617943	0.0118403	0.41491
239227_at	---	---	5.87046	4.94002	5.31894	0.618302	0.00607238	0.386009
208962_s_at	FADS1	fatty acid desaturase 1	7.24774	6.26578	6.72858	0.618691	0.179259	0.711758
243160_at	---	---	6.98911	6.39831	6.23527	0.618695	0.00734932	0.389823
208729_x_at	HLA-B	major histocompatibility complex, class I, B	12.6696	11.846	12.0561	0.618867	0.0223482	0.471035
242673_at	---	---	4.6647	3.84605	4.04858	0.618967	0.000734849	0.291948
1558569_at	LOC100131541	Hypothetical LOC100131541	4.22268	3.30244	3.66792	0.619077	0.0103173	0.403411
202995_s_at	FBLN1	fibulin 1	4.76345	4.04877	4.08604	0.61926	0.017014	0.450499
230000_at	RNF213	ring finger protein 213	6.3573	5.32793	5.86906	0.619354	0.0135898	0.424802
239673_at	---	---	5.63477	4.83854	5.00666	0.619356	0.00949115	0.399201
234989_at	---	---	10.1296	9.06296	9.66925	0.620825	0.0398065	0.53051
243874_at	LPP	LIM domain containing preferred translocation partner in lipoma	5.25228	4.34133	4.69958	0.621125	0.00230147	0.333109
232150_at	---	---	6.76596	5.67906	6.31902	0.621176	0.00510148	0.380671
1565886_at	---	---	5.60726	4.7265	5.03915	0.621852	0.010429	0.403411
244433_at	---	---	5.80563	5.05387	5.16041	0.621932	0.00361133	0.356345
242440_at	---	---	4.65122	3.67982	4.13858	0.622143	0.00162358	0.32523
211644_x_at	IGK@ /// IGKC /// IGKV3-20 /// LOC100291682	immunoglobulin kappa locus /// immunoglobulin kappa constant /// immunoglobulin kappa variable 3-20 /// similar to hCG1686089	9.73043	8.83376	9.17349	0.622289	0.142675	0.676129
209417_s_at	IFI35	interferon-induced protein 35	8.43281	7.72819	7.76179	0.6226	0.0864561	0.611779	Feld, Hepatology 2007
235008_at	---	---	4.96697	4.05977	4.41843	0.622855	0.00492949	0.376459
215318_at	CG012	hypothetical gene CG012	5.79993	4.83408	5.28713	0.622999	0.00554308	0.384042
1554638_at	ZFYVE16	zinc finger, FYVE domain containing 16	4.40108	3.68082	3.74162	0.623185	0.00133328	0.309883
242428_at	DCUN1D1	DCN1, defective in cullin neddylation 1, domain containing 1 (S. cerevisiae)	6.45233	5.68835	5.82016	0.623477	3.99326e-05	0.264799
230292_at	LOC100131993	similar to hCG2020760	6.36093	5.4268	5.83248	0.623917	0.00124341	0.309883
232615_at	---	---	7.53454	6.62543	6.99157	0.624045	0.0104973	0.403411
244845_at	---	---	4.30947	3.37543	3.78273	0.62439	0.00548974	0.384042
243465_at	---	---	6.00127	5.04642	5.48724	0.624451	0.0103759	0.403411
213438_at	NFASC	neurofascin homolog (chicken)	4.57139	3.89445	3.89141	0.624666	0.00404392	0.363348
237716_at	---	---	9.08588	8.1161	8.58313	0.625079	0.0817554	0.608503
227062_at	---	---	8.16125	7.04116	7.75027	0.625508	0.0591376	0.572736
244165_at	C10orf18	chromosome 10 open reading frame 18	5.85888	4.95006	5.32167	0.625654	0.00058272	0.291948
204860_s_at	NAIP	NLR family, apoptosis inhibitory protein	5.99221	5.29322	5.3298	0.62584	0.00864333	0.394797
230389_at	FNBP1	formin binding protein 1	6.82213	5.68118	6.42612	0.626173	0.0102714	0.403411
1556657_at	---	---	5.76722	4.88053	5.22037	0.626642	0.00414682	0.364623
205765_at	CYP3A5	cytochrome P450, family 3, subfamily A, polypeptide 5	11.4248	10.3804	10.9733	0.626818	0.201422	0.72381
243249_at	---	---	6.74337	5.79412	6.23492	0.626875	0.000660088	0.291948
239102_s_at	---	---	5.34303	4.45221	4.8	0.627005	0.00962597	0.401911
211637_x_at	IGH@ /// IGHA1 /// IGHA2 /// IGHD /// IGHG1 /// IGHG3 /// IGHG4 /// IGHM /// IGHV3-23 /// LOC100126583 /// LOC100290146 /// LOC652128	immunoglobulin heavy locus /// immunoglobulin heavy constant alpha 1 /// immunoglobulin heavy constant alpha 2 (A2m marker) /// immunoglobulin heavy constant delta /// immunoglobulin heavy constant gamma 1 (G1m marker) /// immunoglobulin heavy constant gamma 3 (G3m marker) /// immunoglobulin heavy constant gamma 4 (G4m marker) /// immunoglobulin heavy constant mu /// immunoglobulin heavy variable…	7.58707	6.66992	7.05987	0.627014	0.0858378	0.611779
242476_at	---	---	5.69449	4.81791	5.14311	0.627057	0.00653743	0.389823
229483_at	---	---	4.88449	4.10279	4.27669	0.627197	0.00821561	0.390817
234148_at	---	---	4.70302	3.93989	4.08644	0.627837	0.000686646	0.291948
226783_at	AGXT2L2	alanine-glyoxylate aminotransferase 2-like 2	7.34085	6.47273	6.78994	0.628565	0.00174639	0.32523
228531_at	SAMD9	sterile alpha motif domain containing 9	6.0701	5.62406	5.26728	0.628932	0.124681	0.657789
203498_at	RCAN2	regulator of calcineurin 2	4.93152	4.14008	4.33675	0.629149	0.0959918	0.62434
213703_at	LOC150759	hypothetical protein LOC150759	4.52239	3.64553	3.98495	0.630807	0.00318519	0.34665
216197_at	ATF7IP	activating transcription factor 7 interacting protein	5.00573	4.17359	4.44194	0.63094	0.00146549	0.32513
211799_x_at	HLA-C	major histocompatibility complex, class I, C	11.1505	10.3657	10.5583	0.630975	0.022907	0.472089
232270_at	C9orf3	Chromosome 9 open reading frame 3	6.45995	5.67124	5.8711	0.631214	0.00363162	0.356546
207063_at	NCRNA00185	non-protein coding RNA 185	4.34871	3.05317	4.06588	0.631741	0.163771	0.700895
233090_at	---	---	7.02329	6.25593	6.42395	0.631847	0.0084356	0.390817
208436_s_at	IRF7	interferon regulatory factor 7	7.81382	7.2032	7.12277	0.632488	0.0830129	0.608785
241893_at	---	---	4.40925	3.59155	3.84322	0.6327	9.64465e-05	0.291948
235274_at	---	---	5.39443	4.52739	4.85804	0.63271	0.0211931	0.464097
230735_at	---	---	5.69503	4.86712	5.13799	0.633487	0.000203185	0.291948
235157_at	---	---	5.75812	4.70329	5.33827	0.633773	0.128499	0.66218
227717_at	ARHGEF37	Rho guanine nucleotide exchange factor (GEF) 37	5.80599	5.45361	4.9665	0.634274	0.0691646	0.590217
222351_at	PPP2R1B	protein phosphatase 2, regulatory subunit A, beta	6.9534	6.10692	6.41137	0.634548	0.0218847	0.469964
204279_at	PSMB9	proteasome (prosome, macropain) subunit, beta type, 9 (large multifunctional peptidase 2)	9.74212	9.07248	9.09432	0.634639	0.0901392	0.617518
225929_s_at	RNF213	ring finger protein 213	8.72195	7.92654	8.15069	0.634938	0.0199411	0.460314
230885_at	SPG7	spastic paraplegia 7 (pure and complicated autosomal recessive)	6.66833	5.66066	6.22525	0.635163	0.0104435	0.403411
239556_at	LOC645513	Hypothetical LOC645513	3.8067	3.29669	3.06521	0.635212	0.00374295	0.36024
238774_at	---	---	4.82613	3.99166	4.28014	0.63544	0.0199903	0.460314
227833_s_at	MBD6	methyl-CpG binding domain protein 6	7.03798	5.9814	6.62685	0.635879	0.0194453	0.458933
201667_at	GJA1	gap junction protein, alpha 1, 43kDa	6.29308	5.62013	5.65373	0.63642	0.002823	0.34665
1562208_a_at	---	---	7.19436	6.43506	6.60719	0.636521	0.0131734	0.420636
214476_at	TFF2	trefoil factor 2	5.19734	4.49821	4.57569	0.63697	0.00685079	0.389823
233648_at	---	---	6.65508	5.97288	6.02651	0.637863	0.0849301	0.611779
1562062_at	KIAA1245 /// LOC200030 /// NBPF1 /// NBPF10 /// NBPF11 /// NBPF8 /// NBPF9	KIAA1245 /// neuroblastoma breakpoint family, member 11-like /// neuroblastoma breakpoint family, member 1 /// neuroblastoma breakpoint family, member 10 /// neuroblastoma breakpoint family, member 11 /// neuroblastoma breakpoint family, member 8 /// neuroblastoma breakpoint family, member 9	7.2265	6.29882	6.74579	0.638024	0.0104092	0.403411
225239_at	---	---	11.0247	10.0379	10.5806	0.638325	0.0124193	0.415577
202992_at	C7	complement component 7	9.82736	8.92541	9.33237	0.638338	0.0226139	0.471035
230791_at	---	---	6.66754	5.81156	6.15018	0.639786	0.00553371	0.384042
235190_at	---	---	7.5503	6.59121	7.09545	0.639961	0.00207878	0.333109
210387_at	HIST1H2BG	histone cluster 1, H2bg	3.8492	3.242	3.18565	0.640636	0.00716144	0.389823
240569_at	---	---	6.57591	5.51402	6.1856	0.640757	0.00759791	0.389823
228318_s_at	CRIPAK	cysteine-rich PAK1 inhibitor	7.47027	6.51255	7.01783	0.64086	0.0260827	0.484389
236007_at	AKAP10	A kinase (PRKA) anchor protein 10	6.72539	5.83291	6.23431	0.640999	0.00116729	0.302133
215768_at	---	---	6.74493	5.80795	6.28122	0.641185	0.13058	0.664668
230505_at	LOC145474	hypothetical protein LOC145474	3.83443	3.07461	3.26546	0.641476	0.00301247	0.34665
200974_at	ACTA2	actin, alpha 2, smooth muscle, aorta	7.91961	7.12629	7.37107	0.641563	0.195082	0.720736
235985_at	---	---	6.32449	5.39242	5.86041	0.641902	0.00560817	0.384042
222357_at	ZBTB20	zinc finger and BTB domain containing 20	7.97421	7.1048	7.47428	0.642389	0.0333824	0.509928
222372_at	---	---	6.72775	5.73036	6.3061	0.642803	0.0062195	0.388474
243589_at	KIAA1267 /// LOC100294337	KIAA1267 /// hypothetical protein LOC100294337	4.5614	3.64394	4.09399	0.643416	0.0444276	0.540953
242662_at	PCSK6	Proprotein convertase subtilisin/kexin type 6	7.30708	6.25062	6.92492	0.643931	0.0922782	0.619423
228275_at	---	---	6.8202	6.53875	5.97434	0.644295	0.0369712	0.519818
232522_at	---	---	5.7185	5.06348	5.09678	0.644296	0.02067	0.463112
239654_at	CHD9	Chromodomain helicase DNA binding protein 9	5.00567	4.18367	4.48483	0.644487	0.0105254	0.403605
214132_at	ATP5C1	ATP synthase, H+ transporting, mitochondrial F1 complex, gamma polypeptide 1	6.73715	5.9529	6.19393	0.644561	0.000164963	0.291948
213920_at	CUX2	cut-like homeobox 2	8.01414	6.50051	7.90864	0.64459	0.256236	0.763656
226621_at	OSMR	oncostatin M receptor	6.99922	6.38404	6.35486	0.644648	0.00450871	0.374398
206624_at	USP9Y	ubiquitin specific peptidase 9, Y-linked	3.72572	2.46402	3.46938	0.64468	0.189387	0.716736
244826_at	---	---	6.09269	5.34172	5.53134	0.645074	0.00237907	0.333109
242467_at	---	---	3.91434	3.20053	3.33122	0.645223	4.17635e-05	0.264799
239228_at	---	---	3.91499	3.08132	3.40449	0.645419	0.000614049	0.291948
215554_at	GPLD1	glycosylphosphatidylinositol specific phospholipase D1	8.33123	7.27286	7.95696	0.645814	0.0514219	0.556327
229434_at	---	---	7.36332	6.41206	6.92494	0.645855	0.00725418	0.389823
211911_x_at	HLA-B	major histocompatibility complex, class I, B	12.536	11.7824	11.9798	0.646094	0.0421039	0.538472
1557830_at	---	---	4.37772	3.56854	3.85563	0.646292	0.00242768	0.333109
235421_at	MAP3K8	Mitogen-activated protein kinase kinase kinase 8	5.13295	4.56255	4.46804	0.646413	0.000496056	0.291948
226318_at	TBRG1	transforming growth factor beta regulator 1	7.23009	6.32214	6.7678	0.646442	0.00464952	0.374434
228157_at	ZNF207	zinc finger protein 207	7.43237	6.68543	6.87412	0.646617	0.00408376	0.363348
239091_at	---	---	4.62074	3.91259	4.04013	0.646877	0.00140171	0.318872
1552867_at	---	---	4.57193	3.89649	3.97205	0.646978	0.0056634	0.384042
228919_at	---	---	8.98602	8.0431	8.547	0.647083	0.0217566	0.46839
237839_at	---	---	4.0771	3.25198	3.56769	0.647161	0.0219413	0.469997
207576_x_at	OXT	oxytocin, prepropeptide	6.45251	5.82929	5.82268	0.64736	0.00591607	0.386009
242405_at	---	---	4.61121	3.86601	4.05488	0.647452	0.000924391	0.291948
1556194_a_at	---	---	5.73733	5.33092	4.97848	0.647662	0.139543	0.672818
202284_s_at	CDKN1A	cyclin-dependent kinase inhibitor 1A (p21, Cip1)	8.55281	8.07612	7.83782	0.648137	0.0023159	0.333109
239629_at	CFLAR	CASP8 and FADD-like apoptosis regulator	6.78411	5.77521	6.38918	0.648346	0.00727927	0.389823
229470_at	---	---	6.97783	6.13932	6.48081	0.648384	0.000489467	0.291948
240187_at	PPP1R3C	protein phosphatase 1, regulatory (inhibitor) subunit 3C	5.89585	5.5331	5.11368	0.648472	0.0233371	0.472089
230314_at	---	---	7.19417	6.52052	6.60018	0.648929	0.00322097	0.348273
224566_at	NEAT1	nuclear paraspeckle assembly transcript 1 (non-protein coding)	10.8054	9.43482	10.6305	0.649192	0.166472	0.703392
1557071_s_at	NUB1	negative regulator of ubiquitin-like proteins 1	4.06395	3.47372	3.4215	0.64938	0.000310264	0.291948
214669_x_at	IGKC	Immunoglobulin kappa constant	10.3212	9.43206	9.85825	0.649417	0.122479	0.656415
213068_at	DPT	dermatopontin	6.7881	6.06235	6.22866	0.649856	0.0891306	0.615447
215176_x_at	IGK@ /// IGKC /// LOC100291464	immunoglobulin kappa locus /// immunoglobulin kappa constant /// similar to hCG26659	10.0745	9.19806	9.60618	0.65004	0.230416	0.746625
244341_at	---	---	5.07349	4.23052	4.58704	0.650607	0.00874028	0.396163
235926_at	---	---	6.2935	5.39886	5.8405	0.651296	0.00219963	0.333109
1570505_at	ABCB4	ATP-binding cassette, sub-family B (MDR/TAP), member 4	7.3123	6.62484	6.73526	0.651375	0.192986	0.71871
243993_at	---	---	4.57869	3.7003	4.11653	0.651461	0.00987568	0.403411
242736_at	---	---	5.53571	4.5548	5.13619	0.65178	0.035957	0.517702
243318_at	DCAF8	DDB1 and CUL4 associated factor 8	6.993	6.08367	6.55144	0.652039	0.000845213	0.291948
240798_at	---	---	4.11676	3.25207	3.64843	0.652042	0.00316644	0.34665
226670_s_at	PABPC1L	poly(A) binding protein, cytoplasmic 1-like	7.58029	6.53674	7.21956	0.652119	0.0093986	0.397444
1558199_at	FN1	fibronectin 1	6.44502	5.50533	6.02229	0.652211	0.0278229	0.488487
235786_at	---	---	4.64742	3.88673	4.11735	0.652228	0.00018004	0.291948
215024_at	C7orf28B	chromosome 7 open reading frame 28B	4.64484	3.94724	4.07809	0.652558	0.000250489	0.291948
232726_at	---	---	5.23073	4.36043	4.76765	0.652573	0.0118059	0.414126
222380_s_at	PDCD6	Programmed cell death 6	6.21686	5.28337	5.79241	0.652775	0.00104896	0.293685
241617_x_at	---	---	5.19731	4.3781	4.70489	0.652945	0.0729411	0.596322
211633_x_at	---	---	6.82445	6.13759	6.25284	0.653005	0.109437	0.64343
228465_at	---	---	5.70899	4.89294	5.21634	0.653415	0.00531838	0.384042
238142_at	---	---	4.99188	4.05037	4.57554	0.653712	0.00856667	0.393281
240061_at	PION	Pigeon homolog (Drosophila)	4.79148	4.08475	4.23433	0.653726	0.0115316	0.412123
232925_at	---	---	6.4359	5.51031	6.01024	0.653774	0.0414321	0.536455
243271_at	---	---	6.6338	5.75846	6.17986	0.654305	0.016338	0.447903
232793_at	---	---	6.01746	5.31843	5.45851	0.654526	0.0332187	0.509928
1566528_at	---	---	5.31207	4.13967	5.03816	0.654811	0.065078	0.580194
217157_x_at	IGK@ /// IGKC /// LOC652493	immunoglobulin kappa locus /// immunoglobulin kappa constant /// similar to Ig kappa chain V-I region HK102 precursor	7.29937	6.37118	6.87944	0.654957	0.127916	0.661176
244476_at	---	---	4.90053	4.18205	4.3577	0.655789	0.00286655	0.34665
208307_at	RBMY1A1 /// RBMY1B /// RBMY1D /// RBMY1E /// RBMY1F /// RBMY1J	RNA binding motif protein, Y-linked, family 1, member A1 /// RNA binding motif protein, Y-linked, family 1, member B /// RNA binding motif protein, Y-linked, family 1, member D /// RNA binding motif protein, Y-linked, family 1, member E /// RNA binding motif protein, Y-linked, family 1, member F /// RNA binding motif protein, Y-linked, family 1, member J	5.47051	4.37377	5.15491	0.655864	0.115802	0.648783
228904_at	HOXB3	homeobox B3	6.31067	5.51892	5.8142	0.656469	0.00422725	0.366494
216908_x_at	RRN3P1	RNA polymerase I transcription factor homolog (S. cerevisiae) pseudogene 1	6.90836	6.18285	6.3728	0.656657	0.00199181	0.333109
244659_at	LOC100131015	hypothetical LOC100131015	5.96987	5.1673	5.48235	0.657171	0.000452335	0.291948
214234_s_at	CYP3A5	cytochrome P450, family 3, subfamily A, polypeptide 5	11.3426	10.5426	10.8544	0.657415	0.0937138	0.622303
233518_at	---	---	5.44744	4.75934	4.89212	0.657419	0.0120855	0.415577
217436_x_at	HLA-J	major histocompatibility complex, class I, J (pseudogene)	10.9267	10.166	10.4149	0.657435	0.0385276	0.524854
230653_at	---	---	6.80611	6.19327	6.20589	0.657491	0.0242928	0.475442
243168_at	---	---	6.73045	5.83939	6.29906	0.658032	0.0101523	0.403411
221087_s_at	APOL3	apolipoprotein L, 3	8.95526	8.21223	8.43542	0.658139	0.178302	0.711421
209140_x_at	HLA-B	major histocompatibility complex, class I, B	13.3521	12.6741	12.7934	0.6582	0.0435893	0.539573
227952_at	---	---	8.33192	7.36244	7.95042	0.658843	0.137004	0.670478
1556590_s_at	---	---	5.9888	5.29991	5.43943	0.65898	0.0918008	0.618874
209292_at	ID4	Inhibitor of DNA binding 4, dominant negative helix-loop-helix protein	3.10603	2.38218	2.57863	0.659268	0.0136288	0.425027
223802_s_at	RBBP6	retinoblastoma binding protein 6	7.43802	6.61464	6.97116	0.659501	0.00712134	0.389823
235834_at	CALD1	Caldesmon 1	5.78269	5.06469	5.25351	0.659761	0.00240887	0.333109
211528_x_at	HLA-G	major histocompatibility complex, class I, G	12.1474	11.4056	11.6343	0.660247	0.0398255	0.53051
1553145_at	FLJ39653	hypothetical FLJ39653	6.27488	5.66208	5.68546	0.660585	0.0210846	0.464097
239965_at	LOC151878	hypothetical protein LOC151878	4.89615	4.14199	4.39164	0.660609	0.0188383	0.455807
214677_x_at	CYAT1 /// IGLV1-44	cyclosporin A transporter 1 /// immunoglobulin lambda variable 1-44	12.0546	10.7991	11.851	0.660628	0.24384	0.755069
236907_at	---	---	5.46808	4.78637	4.92016	0.660629	0.0048355	0.374434
232759_at	---	---	5.45882	4.88839	4.84453	0.660742	0.0130846	0.41872
225288_at	COL27A1	collagen, type XXVII, alpha 1	7.78613	7.10178	7.24045	0.660815	0.0315393	0.505732
232527_at	---	---	6.71527	5.90145	6.24732	0.66083	0.00234478	0.333109
204698_at	ISG20	interferon stimulated exonuclease gene 20kDa	7.56093	6.98021	6.95319	0.660851	0.169621	0.705294
229457_at	ANKHD1	ankyrin repeat and KH domain containing 1	3.95896	3.21012	3.4521	0.660852	0.00059427	0.291948
215731_s_at	MPHOSPH9	M-phase phosphoprotein 9	5.1676	4.5239	4.59835	0.661049	0.000842616	0.291948
236617_at	---	---	5.30104	4.58894	4.77375	0.661312	0.0116967	0.412534
239780_at	---	---	4.94005	4.29441	4.37396	0.661624	0.000607171	0.291948
223220_s_at	PARP9	poly (ADP-ribose) polymerase family, member 9	9.0541	8.53457	8.41419	0.662149	0.0795679	0.605603	Honda, Gastroenterology 2010
1569519_at	KIAA1245 /// LOC200030 /// NBPF1 /// NBPF10 /// NBPF11 /// NBPF8 /// NBPF9	KIAA1245 /// neuroblastoma breakpoint family, member 11-like /// neuroblastoma breakpoint family, member 1 /// neuroblastoma breakpoint family, member 10 /// neuroblastoma breakpoint family, member 11 /// neuroblastoma breakpoint family, member 8 /// neuroblastoma breakpoint family, member 9	6.04808	5.27099	5.56413	0.66256	0.00836519	0.390817
233713_at	---	---	5.22614	4.50115	4.71097	0.66257	0.00102085	0.293679
229310_at	KLHL29	kelch-like 29 (Drosophila)	5.34331	5.04742	4.57245	0.663081	0.0789985	0.604798
211529_x_at	HLA-G	major histocompatibility complex, class I, G	11.8498	11.1242	11.337	0.663156	0.0435677	0.539573
238733_at	---	---	5.64545	5.16304	4.98697	0.663217	0.00226956	0.333109
200887_s_at	STAT1	signal transducer and activator of transcription 1, 91kDa	10.9378	10.1346	10.4727	0.663489	0.132278	0.665678	Sarasin-Filipowics, PNAS 2008; Feld, Hepatology 2007
234032_at	---	---	5.74206	4.87776	5.31475	0.663801	0.0416553	0.537055
238967_at	---	---	6.51757	5.83543	5.98172	0.664018	0.00309591	0.34665
233369_at	---	---	5.51192	4.57839	5.12692	0.664023	0.0237042	0.472089
236431_at	SR140	U2-associated SR140 protein	4.0936	3.28567	3.63346	0.664085	0.00496605	0.377045
237626_at	---	---	5.83527	5.05108	5.36128	0.6642	0.00548203	0.384042
209138_x_at	IGL@	Immunoglobulin lambda locus	11.9785	10.7477	11.7728	0.664317	0.253402	0.761258
234605_at	CDC14B	CDC14 cell division cycle 14 homolog B (S. cerevisiae)	4.91335	4.17811	4.41257	0.664942	0.00770955	0.389823
212001_at	SFRS14	splicing factor, arginine/serine-rich 14	7.16021	6.27946	6.74715	0.665059	0.00338244	0.352331
206082_at	HCP5	HLA complex P5	6.85721	5.99474	6.43337	0.665113	0.114366	0.64772
240600_at	---	---	4.15417	3.47073	3.6231	0.665167	0.0039271	0.361852
239571_at	---	---	5.9205	5.17292	5.42871	0.665397	0.014256	0.431198
237895_at	---	---	6.62444	5.75657	6.20504	0.665462	0.00410729	0.363673
1565358_at	RARA	retinoic acid receptor, alpha	4.05452	3.39566	3.51129	0.665915	0.132963	0.666004
211748_x_at	PTGDS	prostaglandin D2 synthase 21kDa (brain)	8.33361	7.46061	7.91919	0.66601	0.208563	0.730826
225076_s_at	ZNFX1	zinc finger, NFX1-type containing 1	7.84606	7.22164	7.28316	0.666203	0.0391927	0.527189
240772_at	---	---	4.33263	3.77263	3.73117	0.666227	0.0602838	0.575323
237180_at	PSME4	Proteasome (prosome, macropain) activator subunit 4	5.58656	4.84113	5.09712	0.666451	0.00091792	0.291948
242563_at	---	---	3.40591	2.5838	2.96417	0.666937	0.00897456	0.396163
236379_at	---	---	6.49908	5.74	6.01966	0.666977	0.00372156	0.36024
242558_at	---	---	6.62868	5.81098	6.18454	0.667004	0.00463118	0.374434
225896_at	---	---	6.26097	5.50805	5.77913	0.667345	0.0080972	0.390817
216510_x_at	IGHA1 /// IGHG1 /// IGHM /// IGHV3-23 /// IGHV4-31 /// LOC100290375	immunoglobulin heavy constant alpha 1 /// immunoglobulin heavy constant gamma 1 (G1m marker) /// immunoglobulin heavy constant mu /// immunoglobulin heavy variable 3-23 /// immunoglobulin heavy variable 4-31 /// similar to hCG2042717	6.15474	5.4737	5.63203	0.667998	0.111052	0.644328
202446_s_at	PLSCR1	phospholipid scramblase 1	9.48909	8.98479	8.86069	0.668099	0.108676	0.641945	Feld, Hepatology 2007; Honda, Gastroenterology 2010
1568780_at	LOC649305	hypothetical LOC649305	5.20318	4.34885	4.78484	0.668112	0.00354883	0.356345
1570188_at	NR1I3	nuclear receptor subfamily 1, group I, member 3	5.83178	5.14145	5.31534	0.668199	0.008318	0.390817
241838_at	---	---	4.6776	3.94499	4.18693	0.668317	0.0119747	0.415577
231644_at	---	---	4.71098	3.72182	4.37463	0.668426	0.0889713	0.615447
228608_at	NALCN	sodium leak channel, non-selective	3.91776	3.14159	3.4537	0.668453	0.0400423	0.532122
213071_at	DPT	dermatopontin	7.31984	6.56931	6.84146	0.66876	0.0544068	0.563426
232439_at	---	---	4.44093	3.82573	3.88409	0.669555	0.0132829	0.421378
236561_at	---	---	4.90255	4.26477	4.35942	0.669604	0.0136592	0.425027
232529_at	SP3	Sp3 transcription factor	5.26413	4.57745	4.75057	0.66967	0.00566501	0.384042
212977_at	CXCR7	chemokine (C-X-C motif) receptor 7	6.02463	5.68081	5.30557	0.669729	0.00584583	0.386009
233607_at	---	---	4.59461	3.7065	4.2023	0.669783	0.0472896	0.548349
237383_at	---	---	5.93581	5.11595	5.50262	0.669802	0.0101123	0.403411
1563075_s_at	---	---	5.03579	4.17907	4.62526	0.66996	0.00775569	0.389823
240072_at	ASXL2	Additional sex combs like 2 (Drosophila)	4.59073	3.75489	4.1677	0.669968	0.00337506	0.352331
216614_at	---	---	5.9812	5.1726	5.54285	0.670268	0.12564	0.659034
217317_s_at	HERC2P2 /// HERC2P3 /// LOC440248	hect domain and RLD 2 pseudogene 2 /// hect domain and RLD 2 pseudogene 3 /// hect domain and RLD 2 pseudogene	8.06585	7.28106	7.6137	0.670407	0.000502086	0.291948
237006_at	---	---	4.94147	4.07971	4.53669	0.670751	0.00774752	0.389823
220915_s_at	---	---	5.07576	4.17047	4.69904	0.671315	0.0566163	0.569188
244414_at	---	---	4.54837	3.64372	4.17156	0.671404	0.0265113	0.486435
230456_at	---	---	6.1471	5.38777	5.68326	0.67145	0.0061114	0.386009
235987_at	PRKXP1	protein kinase, X-linked, pseudogene 1	4.64611	3.71017	4.2891	0.671702	0.00498467	0.377288
239752_at	---	---	6.31634	5.58716	5.83591	0.671885	0.0946497	0.622303
204861_s_at	NAIP	NLR family, apoptosis inhibitory protein	5.92128	5.42261	5.30336	0.672123	0.00238028	0.333109
208964_s_at	FADS1	fatty acid desaturase 1	8.27197	7.50472	7.81617	0.672407	0.136387	0.670478
238295_at	C17orf42	Chromosome 17 open reading frame 42	5.71646	4.92816	5.27395	0.6726	0.00178407	0.32523
223980_s_at	SP110	SP110 nuclear body protein	7.32606	6.62605	6.83061	0.672609	0.0377462	0.522967
236978_at	---	---	6.28679	5.45751	5.86919	0.672692	0.00526554	0.384042
1569320_at	GPBP1L1	GC-rich promoter binding protein 1-like 1	5.56861	4.82289	5.10111	0.672763	0.00480887	0.374434
232744_x_at	---	---	5.68713	4.87394	5.26054	0.672887	0.0160113	0.446004
218370_s_at	S100PBP	S100P binding protein	6.68266	5.92736	6.22155	0.672947	0.00128005	0.309883
244530_at	---	---	5.79039	5.16322	5.2526	0.673008	0.0478454	0.549659
228105_at	---	---	5.53125	4.62552	5.16062	0.67301	0.0262187	0.48447
227614_at	HKDC1	hexokinase domain containing 1	6.31352	6.41462	5.339	0.673077	0.418028	0.845409
232141_at	U2AF1	U2 small nuclear RNA auxiliary factor 1	5.78754	5.0707	5.30412	0.67317	0.000821026	0.291948
242448_at	---	---	4.63752	3.95886	4.13152	0.673264	0.000827903	0.291948
235879_at	MBNL1	Muscleblind-like (Drosophila)	5.51294	4.78719	5.03583	0.673453	0.00771659	0.389823
230077_at	LOC220729 /// SDHA /// SDHAP1 /// SDHAP2	succinate dehydrogenase complex, subunit A, flavoprotein pseudogene /// succinate dehydrogenase complex, subunit A, flavoprotein (Fp) /// succinate dehydrogenase complex, subunit A, flavoprotein pseudogene 1 /// succinate dehydrogenase complex, subunit A, flavoprotein pseudogene 2	6.34901	5.69749	5.82989	0.674192	0.01722	0.451213
233271_at	---	---	6.66838	5.96102	6.18324	0.674328	0.00368001	0.359232
236143_at	---	---	7.3928	6.5925	6.9644	0.674616	0.0112527	0.410308
230488_s_at	NCRNA00118	non-protein coding RNA 118	7.93627	7.40773	7.34612	0.674998	0.0214031	0.466466
224012_at	ANKRD20A1 /// ANKRD20A2 /// ANKRD20A3 /// ANKRD20A4	ankyrin repeat domain 20 family, member A1 /// ankyrin repeat domain 20 family, member A2 /// ankyrin repeat domain 20 family, member A3 /// ankyrin repeat domain 20 family, member A4	5.35487	4.5799	4.91413	0.675453	0.235783	0.749487
211798_x_at	IGLJ3	immunoglobulin lambda joining 3	7.09378	6.1323	6.7652	0.675526	0.199365	0.723414
201162_at	IGFBP7	insulin-like growth factor binding protein 7	10.8254	10.2601	10.2597	0.675692	0.00529155	0.384042
236387_at	LOC100129961	hypothetical protein LOC100129961	5.22905	4.57636	4.7173	0.676144	0.135144	0.668987
232958_at	---	---	4.20808	3.76443	3.57103	0.676178	0.00206007	0.333109
220467_at	---	---	6.04641	5.3256	5.57573	0.6762	0.0141799	0.431022
206484_s_at	XPNPEP2	X-prolyl aminopeptidase (aminopeptidase P) 2, membrane-bound	7.25931	6.51303	6.80452	0.676377	0.166773	0.703392
223298_s_at	NT5C3	5'-nucleotidase, cytosolic III	8.29486	7.8283	7.67265	0.6765	0.0606333	0.576011
228504_at	SCN7A	sodium channel, voltage-gated, type VII, alpha	3.37067	2.82712	2.79506	0.676615	0.00375359	0.36024
217378_x_at	LOC100130100 /// LOC100291464	similar to hCG26659 /// similar to hCG26659	8.66909	7.82295	8.2763	0.676991	0.19348	0.71871
202145_at	LY6E	lymphocyte antigen 6 complex, locus E	8.39839	7.98677	7.74525	0.677096	0.0587031	0.572552
239519_at	---	---	4.34177	3.50795	3.94229	0.677192	0.0243077	0.475442
237745_at	LOC641467	hypothetical LOC641467	3.49189	2.69631	3.06965	0.677249	0.00820138	0.390817
205434_s_at	AAK1	AP2 associated kinase 1	6.88378	6.15624	6.42085	0.677289	0.00750396	0.389823
1568815_a_at	DDX50	DEAD (Asp-Glu-Ala-Asp) box polypeptide 50	4.86311	4.04257	4.45616	0.677339	0.000943842	0.291948
1556053_at	DNAJC7	DnaJ (Hsp40) homolog, subfamily C, member 7	6.03628	5.23334	5.61901	0.677412	0.00298939	0.34665
216984_x_at	IGLV2-23 /// LOC100293440	immunoglobulin lambda variable 2-23 /// similar to Ig lambda chain	8.31208	7.28954	8.0271	0.677566	0.178966	0.711758
242424_at	---	---	6.65322	5.82811	6.25062	0.677812	0.00484967	0.374434
211530_x_at	HLA-G	major histocompatibility complex, class I, G	10.6131	9.96021	10.108	0.678073	0.0297231	0.497263
216983_s_at	ZNF224	zinc finger protein 224	6.0125	5.31904	5.53188	0.678101	0.0122188	0.415577
232628_at	---	---	4.50092	3.87965	3.97728	0.678183	0.0269476	0.486538
227129_x_at	FLJ45340	hypothetical LOC402483	7.51191	6.42957	7.26527	0.678289	0.0247536	0.477296
202196_s_at	DKK3	dickkopf homolog 3 (Xenopus laevis)	3.54518	2.90731	3.03205	0.678346	0.00986498	0.403411
244803_at	---	---	5.88167	4.91616	5.56606	0.67862	0.0124479	0.415577
219957_at	RUFY2	RUN and FYVE domain containing 2	5.56369	4.77809	5.14081	0.678818	0.00397567	0.363189
241525_at	LOC200772	hypothetical protein LOC200772	5.77981	5.06046	5.3177	0.678977	0.0116842	0.412534
1561195_at	---	---	4.37334	3.76334	3.84708	0.679401	4.65021e-05	0.264799
210150_s_at	LAMA5	laminin, alpha 5	6.33795	5.74226	5.80437	0.679773	0.000246471	0.291948
228613_at	RAB11FIP3	RAB11 family interacting protein 3 (class II)	5.8663	5.05541	5.4623	0.679909	0.000974165	0.291948
227719_at	SMAD9	SMAD family member 9	5.86158	5.09311	5.4322	0.679932	0.0593289	0.572736
212187_x_at	PTGDS	prostaglandin D2 synthase 21kDa (brain)	8.03476	7.20634	7.64167	0.680023	0.240825	0.752655
216401_x_at	LOC652493	similar to Ig kappa chain V-I region HK102 precursor	8.52678	7.73975	8.10928	0.680147	0.149833	0.684741
213293_s_at	TRIM22	tripartite motif-containing 22	9.88287	9.45936	9.24733	0.680168	0.0699316	0.590964
241936_x_at	---	---	5.64151	4.89318	5.20091	0.680186	0.00197121	0.333109
203148_s_at	TRIM14	tripartite motif-containing 14	8.82814	8.27737	8.27009	0.680508	0.066717	0.584335
239017_at	---	---	5.78405	5.07841	5.31924	0.6806	0.00287347	0.34665
1569180_at	---	---	3.70334	3.03905	3.21396	0.680667	0.00555017	0.384042
211430_s_at	IGH@ /// IGHG1 /// IGHG2 /// IGHM /// IGHV4-31 /// LOC100290146 /// LOC100294459	immunoglobulin heavy locus /// immunoglobulin heavy constant gamma 1 (G1m marker) /// immunoglobulin heavy constant gamma 2 (G2m marker) /// immunoglobulin heavy constant mu /// immunoglobulin heavy variable 4-31 /// hypothetical protein LOC100290146 /// similar to immunoglobulin lambda-like polypeptide 1	12.6476	11.663	12.351	0.680859	0.213073	0.733408
241031_at	C2CD4A	C2 calcium-dependent domain containing 4A	3.7308	3.05396	3.25017	0.681033	0.00627059	0.3893
232668_at	---	---	4.68995	3.94726	4.24916	0.681128	0.0740927	0.597855
242310_at	---	---	4.88422	4.22333	4.39475	0.681247	0.00139546	0.318872
228335_at	CLDN11	claudin 11	5.07877	4.27306	4.67674	0.681405	0.190596	0.717779
227807_at	PARP9	poly (ADP-ribose) polymerase family, member 9	7.02499	6.36999	6.53337	0.681654	0.0486878	0.550318	Honda, Gastroenterology 2010
211650_x_at	IGHA1 /// IGHD /// IGHG1 /// IGHG3 /// IGHM /// IGHV1-69 /// IGHV3-23 /// IGHV4-31 /// LOC100126583 /// LOC100290375	immunoglobulin heavy constant alpha 1 /// immunoglobulin heavy constant delta /// immunoglobulin heavy constant gamma 1 (G1m marker) /// immunoglobulin heavy constant gamma 3 (G3m marker) /// immunoglobulin heavy constant mu /// immunoglobulin heavy variable 1-69 /// immunoglobulin heavy variable 3-23 /// immunoglobulin heavy variable 4-31 /// hypothetical LOC100126583 /// similar to hCG2042717	7.19133	6.47671	6.7356	0.681689	0.0772542	0.601537
1563792_at	---	---	5.38365	4.6019	4.96856	0.681794	0.0234962	0.472089
214753_at	N4BP2L2	NEDD4 binding protein 2-like 2	7.51372	6.78517	7.06677	0.681813	0.0178021	0.453205
238595_at	---	---	5.62817	4.87343	5.19716	0.681882	0.00132968	0.309883
233254_x_at	PTEN	phosphatase and tensin homolog	5.99234	5.36997	5.48332	0.682297	0.000594573	0.291948
231199_at	---	---	5.2603	4.48148	4.84555	0.682416	0.0101506	0.403411
240662_at	---	---	4.51591	3.80962	4.05772	0.682438	0.0232704	0.472089
241775_at	---	---	4.19172	3.34745	3.81655	0.68251	0.00728296	0.389823
241916_at	---	---	3.99302	3.45676	3.43313	0.682535	0.0174619	0.452658
237778_at	---	---	3.82533	3.25914	3.28418	0.682764	0.00402771	0.363348
230892_at	---	---	5.53053	4.90595	5.02528	0.68302	0.0190457	0.457278
243768_at	---	---	7.48856	6.59386	7.14606	0.68322	0.0139803	0.428941
240908_at	---	---	5.98596	5.21349	5.57025	0.683257	0.00208885	0.333109
210732_s_at	LGALS8	lectin, galactoside-binding, soluble, 8	4.34279	3.71826	3.8384	0.683285	0.0518389	0.556567
221651_x_at	IGK@ /// IGKC	immunoglobulin kappa locus /// immunoglobulin kappa constant	12.7927	11.9954	12.3922	0.683335	0.124664	0.657789
225931_s_at	RNF213	ring finger protein 213	7.65424	7.06139	7.13162	0.683512	0.0746663	0.597855
223597_at	ITLN1	intelectin 1 (galactofuranose binding)	7.99119	7.68312	7.29868	0.683803	0.14016	0.673247
229574_at	TRA2A	transformer 2 alpha homolog (Drosophila)	6.7694	5.8955	6.41659	0.683866	0.00664093	0.389823
214967_at	---	---	5.1758	4.45883	4.72967	0.68411	0.00429075	0.366494
217236_x_at	IGH@ /// IGHA1 /// IGHA2 /// IGHD /// IGHG1 /// IGHG3 /// IGHG4 /// IGHM /// LOC100126583 /// LOC652128	immunoglobulin heavy locus /// immunoglobulin heavy constant alpha 1 /// immunoglobulin heavy constant alpha 2 (A2m marker) /// immunoglobulin heavy constant delta /// immunoglobulin heavy constant gamma 1 (G1m marker) /// immunoglobulin heavy constant gamma 3 (G3m marker) /// immunoglobulin heavy constant gamma 4 (G4m marker) /// immunoglobulin heavy constant mu /// hypothetical LOC100126583 ///…	5.80918	5.09802	5.35965	0.684136	0.0957982	0.623912
232330_at	---	---	4.26149	3.64926	3.75298	0.684252	0.0116464	0.412327
225321_s_at	PILRB	paired immunoglobin-like type 2 receptor beta	8.71007	7.91383	8.3138	0.684792	0.00559955	0.384042
241824_at	---	---	3.51119	2.84826	3.03523	0.684883	0.0018514	0.32523
1559249_at	ATXN1	ataxin 1	5.53534	4.8098	5.09749	0.685043	0.00528355	0.384042
230387_at	---	---	5.4552	4.82968	4.95797	0.68523	0.0038621	0.361131
237442_at	---	---	4.41158	3.74973	3.93626	0.685267	0.0188539	0.455807
205525_at	CALD1	caldesmon 1	5.56986	5.09164	4.98477	0.685387	0.00581832	0.386009
243088_at	---	---	4.966	4.22326	4.54001	0.6855	0.00737218	0.389823
237496_at	---	---	5.13485	4.69787	4.52548	0.685524	0.00399959	0.363348
209761_s_at	SP110	SP110 nuclear body protein	7.01215	6.51602	6.43845	0.685575	0.109809	0.643745
232458_at	COL3A1	Collagen, type III, alpha 1	5.57801	4.81169	5.16723	0.685816	0.0345517	0.511701
207977_s_at	DPT	dermatopontin	6.5751	5.76389	6.19143	0.685869	0.0455564	0.545559
226145_s_at	FRAS1	Fraser syndrome 1	4.85469	4.20783	4.37341	0.686168	0.0127627	0.416875
74694_s_at	RABEP2	rabaptin, RAB GTPase binding effector protein 2	5.61672	5.09588	5.06069	0.686424	0.0546312	0.564388
223746_at	STK4	serine/threonine kinase 4	5.34636	4.57834	4.93889	0.686499	0.0117403	0.413368
211635_x_at	IGH@ /// IGHA1 /// IGHA2 /// IGHD /// IGHG1 /// IGHG3 /// IGHG4 /// IGHM /// IGHV4-31 /// LOC100133862 /// LOC100290146 /// LOC100290528	immunoglobulin heavy locus /// immunoglobulin heavy constant alpha 1 /// immunoglobulin heavy constant alpha 2 (A2m marker) /// immunoglobulin heavy constant delta /// immunoglobulin heavy constant gamma 1 (G1m marker) /// immunoglobulin heavy constant gamma 3 (G3m marker) /// immunoglobulin heavy constant gamma 4 (G4m marker) /// immunoglobulin heavy constant mu /// immunoglobulin heavy variable…	7.64947	6.8232	7.2771	0.686541	0.11828	0.651106
1556338_at	---	---	4.97888	4.39229	4.46319	0.686684	0.00336135	0.352281
235613_at	---	---	5.53028	4.88548	5.04984	0.686782	0.0935516	0.621724
215573_at	CAT	Catalase	5.991	5.35177	5.5074	0.686835	0.0275913	0.488487
210425_x_at	GOLGA8B	golgin A8 family, member B	7.76291	7.00996	7.34873	0.687188	0.0165223	0.448166
224558_s_at	MALAT1	metastasis associated lung adenocarcinoma transcript 1 (non-protein coding)	8.08891	7.20416	7.75472	0.687461	0.00830397	0.390817
225954_s_at	MIDN	midnolin	6.13723	5.29192	5.77942	0.687474	0.00829903	0.390817
223434_at	GBP3	guanylate binding protein 3	8.55817	8.31552	7.839	0.687548	0.137366	0.670478
236370_at	---	---	5.83996	5.15791	5.38468	0.687618	0.0250554	0.47877
217235_x_at	IGLL5 /// IGLV2-23	immunoglobulin lambda-like polypeptide 5 /// immunoglobulin lambda variable 2-23	8.43939	7.5697	8.09754	0.68787	0.179283	0.711758
232113_at	---	---	6.04028	5.3259	5.60579	0.688031	0.00786271	0.389823
1570482_at	---	---	3.71333	2.92564	3.32424	0.688453	0.0267988	0.486538
240216_at	---	---	5.9535	5.18182	5.55563	0.688703	0.104702	0.63774
225293_at	COL27A1	collagen, type XXVII, alpha 1	8.52785	7.84852	8.07467	0.688733	0.0294068	0.497099
1554455_at	LINS1	lines homolog 1 (Drosophila)	4.19742	3.72152	3.62235	0.688782	0.000512218	0.291948
226848_at	---	---	6.94397	6.20258	6.52886	0.688981	0.00273271	0.345799
232180_at	UGP2	UDP-glucose pyrophosphorylase 2	8.48167	8.05118	7.88032	0.689072	0.0152225	0.439638
1555745_a_at	LYZ	lysozyme	7.35274	6.7007	6.88462	0.689159	0.229934	0.746194
1557293_at	LOC440993	hypothetical LOC440993	4.70423	4.06312	4.22985	0.689248	0.012909	0.417143
215313_x_at	HLA-A	major histocompatibility complex, class I, A	13.0696	12.4062	12.6086	0.689273	0.0488911	0.550318
211634_x_at	IGHM /// LOC100133862	immunoglobulin heavy constant mu /// similar to hCG1773549	7.78969	6.93493	7.44367	0.689299	0.224674	0.742304
243367_at	---	---	5.13938	4.43255	4.70587	0.68968	0.0206521	0.463112
230624_at	SLC25A27	solute carrier family 25, member 27	6.16629	5.50811	5.70376	0.689728	0.0201564	0.460314
1566446_at	---	---	4.76595	4.09724	4.31008	0.689832	0.0442533	0.540811
210069_at	CHKB-CPT1B /// CPT1B	choline kinase-like, carnitine palmitoyltransferase 1B (muscle) transcription unit /// carnitine palmitoyltransferase 1B (muscle)	5.80474	5.30109	5.25095	0.690163	0.123822	0.657482
226757_at	IFIT2	interferon-induced protein with tetratricopeptide repeats 2	8.67923	8.42166	7.97793	0.690206	0.20368	0.725655
1570306_at	ST18	Suppression of tumorigenicity 18 (breast carcinoma) (zinc finger protein)	3.87872	3.10673	3.48641	0.69031	0.0437023	0.539573
236427_at	---	---	5.22402	4.59971	4.74328	0.690361	0.0360981	0.517785
232017_at	TJP2	tight junction protein 2 (zona occludens 2)	7.44662	6.84689	6.95191	0.690591	0.0151991	0.439335
230651_at	---	---	4.47047	3.76693	4.03905	0.690893	0.00274741	0.346377
244581_at	---	---	5.29301	4.93239	4.65631	0.691033	0.0235153	0.472089
215801_at	---	---	4.34251	3.80063	3.81479	0.691102	0.0437623	0.539573
201221_s_at	SNRNP70	small nuclear ribonucleoprotein 70kDa (U1)	8.07083	7.1845	7.74994	0.691148	0.0108264	0.404478
211639_x_at	IGH@ /// IGHA1 /// IGHA2 /// IGHD /// IGHG1 /// IGHG3 /// IGHG4 /// IGHM /// IGHV4-31 /// LOC100126583 /// LOC652128	immunoglobulin heavy locus /// immunoglobulin heavy constant alpha 1 /// immunoglobulin heavy constant alpha 2 (A2m marker) /// immunoglobulin heavy constant delta /// immunoglobulin heavy constant gamma 1 (G1m marker) /// immunoglobulin heavy constant gamma 3 (G3m marker) /// immunoglobulin heavy constant gamma 4 (G4m marker) /// immunoglobulin heavy constant mu /// immunoglobulin heavy variable…	6.44042	5.66187	6.05486	0.691149	0.15399	0.689543
243090_at	---	---	3.96796	3.25002	3.54683	0.691389	0.0109441	0.404478
219151_s_at	RABL2A /// RABL2B	RAB, member of RAS oncogene family-like 2A /// RAB, member of RAS oncogene family-like 2B	6.35184	5.78288	5.8414	0.691412	0.000568035	0.291948
212865_s_at	COL14A1	collagen, type XIV, alpha 1	5.89082	5.20099	5.45309	0.691468	0.00537949	0.384042
214850_at	LOC100170939	glucuronidase, beta pseudogene	5.66147	5.15639	5.11345	0.691634	0.0109242	0.404478
214722_at	NOTCH2NL	Notch homolog 2 (Drosophila) N-terminal like	8.77429	8.06621	8.34899	0.691912	0.00861994	0.394255
212807_s_at	SORT1	sortilin 1	4.36225	3.75729	3.87589	0.692155	0.0225701	0.471035
220983_s_at	SPRY4	sprouty homolog 4 (Drosophila)	4.35711	3.79106	3.84774	0.692254	0.0020807	0.333109
206963_s_at	NAT8 /// NAT8B	N-acetyltransferase 8 (GCN5-related, putative) /// N-acetyltransferase 8B (GCN5-related, putative, gene/pseudogene)	8.79752	8.50233	8.12585	0.69232	0.0517137	0.556567
241769_at	---	---	4.82999	4.10133	4.41944	0.69263	0.00938053	0.397444
235902_at	---	---	5.64354	4.93641	5.22035	0.692716	0.00293863	0.34665
240971_x_at	---	---	5.14891	4.26653	4.83137	0.692861	0.0236592	0.472089
235513_at	---	---	5.32515	4.52905	4.95593	0.692887	0.00314576	0.34665
221671_x_at	IGK@ /// IGKC	immunoglobulin kappa locus /// immunoglobulin kappa constant	12.7482	12.0041	12.3479	0.69292	0.137934	0.670624
202949_s_at	FHL2	four and a half LIM domains 2	6.82179	6.79654	5.99038	0.692988	0.248846	0.758198
243149_at	---	---	4.1703	3.55563	3.69303	0.693131	0.0307955	0.501769
230099_at	---	---	7.01555	6.06277	6.74195	0.693376	0.0818378	0.608503
227517_s_at	GAS5	growth arrest-specific 5 (non-protein coding)	6.23994	5.51736	5.82845	0.693442	0.00824894	0.390817
243527_at	---	---	5.89873	5.22078	5.46052	0.693463	0.00564482	0.384042
216858_x_at	---	---	8.37576	7.6887	7.94465	0.693952	0.00624795	0.388966
208963_x_at	FADS1	fatty acid desaturase 1	7.11097	6.44174	6.66964	0.694098	0.116391	0.649245
206385_s_at	ANK3	ankyrin 3, node of Ranvier (ankyrin G)	7.15949	6.58656	6.6607	0.694192	0.0168334	0.448813
224568_x_at	MALAT1	metastasis associated lung adenocarcinoma transcript 1 (non-protein coding)	7.8514	6.81186	7.63298	0.694313	0.063593	0.578512
236953_s_at	NHLRC3	NHL repeat containing 3	4.52897	4.01974	3.99266	0.6944	0.0162398	0.447099
225157_at	MLXIP	MLX interacting protein	7.53368	6.7939	7.13578	0.694427	0.00891046	0.396163
214973_x_at	IGHD /// LOC100290059 /// LOC100292999	immunoglobulin heavy constant delta /// similar to hCG2042717 /// hypothetical protein LOC100292999	7.02404	6.14235	6.7114	0.694459	0.262246	0.767617
1569512_at	---	---	3.94123	3.31178	3.47768	0.694591	0.0332957	0.509928
211881_x_at	IGLJ3	immunoglobulin lambda joining 3	6.97135	6.06909	6.67163	0.694634	0.185343	0.715789
243827_at	---	---	4.51969	3.84463	4.08377	0.694671	0.00312215	0.34665
221661_at	SLC22A7	solute carrier family 22 (organic anion transporter), member 7	6.88069	6.34488	6.36124	0.694679	0.0213186	0.465251
224795_x_at	IGK@ /// IGKC	immunoglobulin kappa locus /// immunoglobulin kappa constant	13.0481	12.3072	12.653	0.695055	0.133244	0.66653
222999_s_at	CCNL2	cyclin L2	8.98586	8.19298	8.62231	0.695175	0.0151875	0.439335
212921_at	SMYD2	SET and MYND domain containing 2	5.06434	4.40939	4.61904	0.695479	0.00168804	0.32523
227379_at	MBOAT1	membrane bound O-acyltransferase domain containing 1	6.77323	6.44746	6.13047	0.695493	0.050106	0.552451
219593_at	SLC15A3	solute carrier family 15, member 3	7.50636	7.04974	6.94278	0.695694	0.0531509	0.559788
235497_at	LOC643837	hypothetical LOC643837	4.98731	4.93218	4.18343	0.695872	0.0618616	0.576633
242868_at	---	---	6.37736	5.6969	5.94874	0.695894	0.00760213	0.389823
242645_at	---	---	5.72957	4.98275	5.34135	0.69607	0.00360227	0.356345
243003_at	---	---	6.52003	5.739	6.1532	0.696334	0.0384167	0.524234
217626_at	AKR1C1	aldo-keto reductase family 1, member C1 (dihydrodiol dehydrogenase 1; 20-alpha (3-alpha)-hydroxysteroid dehydrogenase)	6.53108	5.96351	6.03657	0.696447	0.0248625	0.478056
204446_s_at	ALOX5	arachidonate 5-lipoxygenase	6.19551	5.58799	5.72511	0.696493	0.130175	0.664398
216565_x_at	---	---	9.86554	9.38413	9.31989	0.696618	0.034802	0.512662
210289_at	NAT8	N-acetyltransferase 8 (GCN5-related, putative)	9.49599	9.23438	8.81907	0.696804	0.0742048	0.597855
241803_s_at	LOC401522	hypothetical LOC401522	4.2705	3.60651	3.83649	0.69725	0.024931	0.478359
213110_s_at	COL4A5	collagen, type IV, alpha 5	4.13279	3.5379	3.65766	0.697356	0.0732495	0.596322
214247_s_at	DKK3	dickkopf homolog 3 (Xenopus laevis)	6.95827	6.30958	6.51553	0.697385	0.0621236	0.576633
208812_x_at	HLA-C	major histocompatibility complex, class I, C	13.0028	12.3958	12.5352	0.697426	0.0593589	0.572736
203147_s_at	TRIM14	tripartite motif-containing 14	8.11111	7.60549	7.5829	0.697501	0.0747921	0.5984
239167_at	---	---	4.93704	4.37938	4.44021	0.697543	0.00358386	0.356345
244723_at	LOC100129488	hypothetical protein LOC100129488	7.48893	6.41737	7.30121	0.697778	0.142058	0.675079
205043_at	CFTR	cystic fibrosis transmembrane conductance regulator (ATP-binding cassette sub-family C, member 7)	5.75639	5.04323	5.35439	0.698009	0.165989	0.70327
239679_at	---	---	4.38661	3.74858	3.93957	0.698019	0.00473001	0.374434
217281_x_at	IGH@ /// IGHA1 /// IGHA2 /// IGHG1 /// IGHG2 /// IGHG3 /// IGHM /// IGHV4-31 /// LOC100126583 /// LOC100290036	immunoglobulin heavy locus /// immunoglobulin heavy constant alpha 1 /// immunoglobulin heavy constant alpha 2 (A2m marker) /// immunoglobulin heavy constant gamma 1 (G1m marker) /// immunoglobulin heavy constant gamma 2 (G2m marker) /// immunoglobulin heavy constant gamma 3 (G3m marker) /// immunoglobulin heavy constant mu /// immunoglobulin heavy variable 4-31 /// hypothetical LOC100126583 /// …	7.19154	6.35254	6.86558	0.698171	0.164354	0.701407
232284_at	PSMD6	Proteasome (prosome, macropain) 26S subunit, non-ATPase, 6	4.96854	4.4111	4.47433	0.698376	0.00795996	0.390406
240262_at	---	---	3.79575	3.13037	3.36641	0.698408	0.000985761	0.291948
215379_x_at	IGLV1-44	immunoglobulin lambda variable 1-44	10.5334	9.45	10.3553	0.698517	0.271395	0.772842
215121_x_at	CYAT1 /// IGLV1-44	cyclosporin A transporter 1 /// immunoglobulin lambda variable 1-44	11.9509	10.8035	11.8122	0.698838	0.271957	0.773085
241812_at	SPATS2L	spermatogenesis associated, serine-rich 2-like	5.77807	5.29901	5.23919	0.699091	0.0026827	0.345799
215076_s_at	COL3A1	collagen, type III, alpha 1	9.51493	8.65991	9.20172	0.699118	0.0886018	0.615436
236524_at	---	---	4.67069	3.97116	4.26455	0.69923	0.0440129	0.539573
220954_s_at	PILRB	paired immunoglobin-like type 2 receptor beta	6.64666	5.9254	6.25396	0.699353	0.00104516	0.293685
236492_at	PPP2R2A	protein phosphatase 2, regulatory subunit B, alpha	6.20944	5.56753	5.76929	0.699397	0.0175196	0.452998
229779_at	COL4A4	collagen, type IV, alpha 4	5.1517	4.41519	4.76861	0.699493	0.0278022	0.488487
235575_at	---	---	3.72464	3.23579	3.19359	0.699685	0.000280556	0.291948
1558117_s_at	USP31	ubiquitin specific peptidase 31	5.03961	4.43106	4.58066	0.699769	0.0285631	0.494145
1558369_at	MPHOSPH9	M-phase phosphoprotein 9	6.55344	5.91245	6.11437	0.699896	0.0136981	0.425733
214459_x_at	HLA-C	major histocompatibility complex, class I, C	12.7802	12.159	12.3296	0.699986	0.0709541	0.59199
212000_at	SFRS14	splicing factor, arginine/serine-rich 14	5.87295	5.2998	5.39496	0.700433	0.00432236	0.368273
222139_at	KIAA1466	KIAA1466 gene	4.35776	3.93408	3.79057	0.70058	0.04833	0.550318
209007_s_at	C1orf63	chromosome 1 open reading frame 63	8.9544	8.4102	8.46024	0.700802	0.00125431	0.309883
1553292_s_at	SGK494	uncharacterized serine/threonine-protein kinase SgK494	3.99818	3.42673	3.52056	0.700855	0.000360735	0.291948
207435_s_at	SRRM2	serine/arginine repetitive matrix 2	8.40552	7.50437	8.12635	0.701047	0.0166283	0.448166
242559_at	---	---	4.07414	3.58011	3.55108	0.701163	0.000717087	0.291948
236752_at	---	---	6.01559	5.26831	5.64457	0.701192	0.00689674	0.389823
1557360_at	LRPPRC	leucine-rich PPR-motif containing	5.31821	4.58159	4.94126	0.701336	0.0228835	0.472089
1557240_a_at	---	---	3.88481	3.2841	3.42638	0.701355	0.01176	0.413368
209846_s_at	BTN3A2	butyrophilin, subfamily 3, member A2	8.31986	7.86025	7.77815	0.701774	0.0973099	0.625221
221491_x_at	HLA-DRB1 /// HLA-DRB3 /// HLA-DRB4 /// HLA-DRB5 /// LOC100133661 /// LOC100294036	major histocompatibility complex, class II, DR beta 1 /// major histocompatibility complex, class II, DR beta 3 /// major histocompatibility complex, class II, DR beta 4 /// major histocompatibility complex, class II, DR beta 5 /// similar to HLA class II histocompatibility antigen, DR-W53 beta chain /// similar to HLA class II histocompatibility antigen, DRB1-7 beta chain	4.36919	3.4964	4.07583	0.701907	0.191229	0.718117
221973_at	---	---	5.33467	4.67432	4.91391	0.701929	0.0103808	0.403411
216207_x_at	IGKV1D-13	Immunoglobulin kappa variable 1D-13	9.36746	8.54834	9.04234	0.702044	0.1812	0.712072
211645_x_at	---	---	7.76929	6.87227	7.49145	0.702202	0.319588	0.800751
232551_at	SLC26A6	solute carrier family 26, member 6	5.20256	4.57934	4.76076	0.702303	0.0136258	0.425027
239005_at	FLJ39739	Hypothetical FLJ39739	5.61286	4.9026	5.22334	0.702319	0.00254647	0.34253
231087_at	---	---	4.14136	3.61706	3.64029	0.70233	9.60655e-05	0.291948
1559148_at	LOC100129103	Similar to hCG2038970	4.76622	4.15412	4.31795	0.702364	0.0108002	0.404478
213294_at	---	---	8.7144	8.24967	8.17865	0.702656	0.154408	0.69034
225911_at	NPNT	nephronectin	5.05669	4.36314	4.65837	0.702691	0.0578036	0.570438
233893_s_at	KIAA1530	KIAA1530	7.30008	6.47784	6.97926	0.702783	0.00754233	0.389823
1556088_at	RPAIN	RPA interacting protein	4.52568	3.72354	4.19301	0.702844	0.0178516	0.453205
230036_at	SAMD9L	sterile alpha motif domain containing 9-like	5.42339	4.94495	4.89826	0.703382	0.106867	0.639708
232346_at	LOC388692	hypothetical LOC388692	6.05707	5.21761	5.7491	0.703547	0.00972031	0.401911
204055_s_at	CTAGE5	CTAGE family, member 5	6.47569	5.68668	6.1377	0.703623	0.0571738	0.569545
205001_s_at	DDX3Y	DEAD (Asp-Glu-Ala-Asp) box polypeptide 3, Y-linked	5.45689	4.26361	5.36199	0.703784	0.387505	0.834892
217617_at	---	---	4.94755	4.40977	4.45957	0.703852	0.0330662	0.509928
205511_at	FLJ10038	hypothetical protein FLJ10038	5.43935	4.65495	5.09939	0.703872	0.00652048	0.389823
209964_s_at	ATXN7	ataxin 7	5.47982	4.77617	5.09159	0.703921	0.0215695	0.467402
236966_at	ARMC8	armadillo repeat containing 8	5.41505	4.71407	5.02544	0.703989	0.000608339	0.291948
1560741_at	SNRPN	small nuclear ribonucleoprotein polypeptide N	6.18715	5.42189	5.83697	0.704252	0.0126125	0.41645
1561139_at	---	---	3.6131	2.97421	3.18775	0.704452	0.00216726	0.333109
233425_at	---	---	4.69779	4.01947	4.29632	0.70452	0.0125494	0.415967
236801_at	---	---	5.48923	4.73527	5.1335	0.704628	0.0751862	0.599349
229633_at	INTS10	integrator complex subunit 10	5.69331	4.89438	5.36548	0.704909	0.0165358	0.448166
221806_s_at	SETD5	SET domain containing 5	8.02445	7.24338	7.68608	0.704959	0.00707557	0.389823
220702_at	---	---	4.68679	4.16691	4.1917	0.70496	0.00381145	0.361131
233224_at	---	---	4.88372	4.30905	4.42158	0.704983	0.00441357	0.369965
220437_at	LOC55908	hepatocellular carcinoma-associated gene TD26	8.98108	9.04471	8.1361	0.705028	0.152677	0.687992
228793_at	JMJD1C	jumonji domain containing 1C	6.85275	6.44709	6.28985	0.70518	0.0178711	0.453205
224565_at	NEAT1	nuclear paraspeckle assembly transcript 1 (non-protein coding)	11.3451	10.3459	11.1392	0.705424	0.126848	0.659792
226771_at	ATP8B2	ATPase, class I, type 8B, member 2	6.06475	5.24019	5.75438	0.705543	0.0413733	0.536048
230503_at	---	---	5.78851	5.14696	5.36846	0.705582	0.00852995	0.392769
233867_at	---	---	6.06985	5.26028	5.75073	0.70562	0.107002	0.639867
244457_at	---	---	7.12418	6.29209	6.81949	0.705899	0.132161	0.665678
237305_at	---	---	4.78163	4.10802	4.38237	0.706061	0.127719	0.660956
215071_s_at	HIST1H2AC	histone cluster 1, H2ac	8.90732	8.57376	8.30411	0.706087	0.00998334	0.403411
244474_at	---	---	4.67142	4.01914	4.26063	0.706445	0.0122179	0.415577
242438_at	ASXL1	additional sex combs like 1 (Drosophila)	5.63842	4.80531	5.33699	0.706709	0.0113037	0.410416
242865_at	---	---	4.35849	3.70619	3.9491	0.706872	0.0149762	0.43732
240174_at	---	---	4.83018	4.14873	4.4383	0.706876	0.00728371	0.389823
1569181_x_at	---	---	4.97123	4.46865	4.47209	0.706894	0.00350429	0.356345
242920_at	---	---	5.70503	4.80933	5.44225	0.707046	0.0652433	0.580194
231437_at	SLC35D2	solute carrier family 35, member D2	6.33775	5.71036	5.91495	0.707338	0.000670103	0.291948
1570566_at	LOC100287529	hypothetical protein LOC100287529	4.50944	3.91679	4.06653	0.707563	0.00469092	0.374434
225895_at	SYNPO2	synaptopodin 2	5.76022	5.22842	5.2809	0.707597	0.0140904	0.429833
216526_x_at	HLA-C	major histocompatibility complex, class I, C	12.5215	11.9274	12.0798	0.707642	0.0495949	0.55126
210718_s_at	ARL17A /// LOC100294341	ADP-ribosylation factor-like 17A /// similar to ADP-ribosylation factor-like 17	4.57066	3.97644	4.12923	0.707734	0.00354872	0.356345
238804_at	---	---	5.43118	4.89135	4.95799	0.707998	0.0985592	0.627083
1555920_at	CBX3	Chromobox homolog 3 (HP1 gamma homolog, Drosophila)	6.26412	5.69848	5.80643	0.708003	0.00920309	0.397444
235629_at	---	---	5.88061	5.23519	5.47115	0.708112	0.0867677	0.612501
201296_s_at	WSB1	WD repeat and SOCS box-containing 1	8.75241	8.14452	8.32093	0.708268	0.00719813	0.389823
211964_at	COL4A2	collagen, type IV, alpha 2	7.65664	6.8886	7.32192	0.708476	0.0732712	0.596322
235805_at	---	---	5.65967	4.94644	5.29294	0.708743	0.0373847	0.521767
33304_at	ISG20	interferon stimulated exonuclease gene 20kDa	7.59781	7.07844	7.11496	0.708804	0.204897	0.726712
230323_s_at	TMEM45B	transmembrane protein 45B	7.34067	7.26089	6.59474	0.709007	0.521275	0.886773
1559739_at	CHPT1	Choline phosphotransferase 1	6.01978	5.37853	5.61183	0.709346	0.0206827	0.463112
1557706_at	ZHX2	zinc fingers and homeoboxes 2	3.41786	2.87184	2.9539	0.709693	0.000100262	0.291948
243964_at	---	---	5.51291	5.01042	5.02319	0.709804	0.0183045	0.454121
233214_at	---	---	5.684	5.15644	5.20974	0.709934	0.00111382	0.301518
205422_s_at	ITGBL1	integrin, beta-like 1 (with EGF-like repeat domains)	3.80265	3.2721	3.33115	0.710227	0.0820904	0.608785
211161_s_at	COL3A1	collagen, type III, alpha 1	8.12541	7.45597	7.73933	0.710872	0.0757192	0.600214
219691_at	SAMD9	sterile alpha motif domain containing 9	4.263	3.82397	3.73889	0.71094	0.0720006	0.594061
242191_at	NBPF10	neuroblastoma breakpoint family, member 10	7.45408	6.85204	7.02794	0.71099	0.000150741	0.291948
232030_at	KIAA1632	KIAA1632	3.79472	3.27011	3.32225	0.711027	0.00071611	0.291948
215175_at	PCNX	pecanex homolog (Drosophila)	4.82558	4.50195	4.23269	0.711078	0.0167187	0.448166
242110_at	---	---	5.80995	5.17135	5.40606	0.711086	0.0255376	0.483009
227232_at	EVL	Enah/Vasp-like	7.02573	6.38363	6.62454	0.711269	0.0032341	0.348273
227260_at	ANKRD10	Ankyrin repeat domain 10	5.39201	4.66686	5.04073	0.711295	0.00385327	0.361131
1558078_at	---	---	5.43026	4.46629	5.22253	0.711372	0.112807	0.646998
229422_at	NRD1	nardilysin (N-arginine dibasic convertase)	5.72251	5.00626	5.36677	0.711566	0.00835397	0.390817
230688_at	---	---	4.49516	4.05455	3.97425	0.711633	0.00170982	0.32523
232098_at	DST	dystonin	6.70514	5.93684	6.38136	0.71179	0.0241042	0.473944
216268_s_at	JAG1	jagged 1 (Alagille syndrome)	7.38911	6.63831	7.05503	0.711852	0.0397233	0.530396
232473_at	PRPF18	PRP18 pre-mRNA processing factor 18 homolog (S. cerevisiae)	4.94986	4.35798	4.52047	0.711863	0.00427466	0.366494
1563467_at	---	---	5.17499	4.32773	4.90002	0.712231	0.0372722	0.521261
208727_s_at	CDC42	cell division cycle 42 (GTP binding protein, 25kDa)	8.07919	6.78965	8.0696	0.712237	0.246562	0.756708
233123_at	SLC40A1	Solute carrier family 40 (iron-regulated transporter), member 1	6.84924	6.27707	6.40934	0.71227	0.0144525	0.432764
239559_at	---	---	5.07704	4.59545	4.58318	0.712391	0.00408055	0.363348
226311_at	---	---	6.01694	5.36372	5.62764	0.712883	0.0223952	0.471035
227074_at	LOC100131564	hypothetical protein LOC100131564	7.8873	7.03083	7.62068	0.713104	0.0419058	0.538051
228304_at	RBM43	RNA binding motif protein 43	6.79941	6.41748	6.24831	0.713179	0.088196	0.615436
236251_at	---	---	4.91599	4.3403	4.48144	0.713273	0.0281119	0.489786
240458_at	---	---	7.11267	6.07283	6.95708	0.713418	0.219745	0.739378
210705_s_at	TRIM5	tripartite motif-containing 5	7.36727	7.01907	6.79739	0.713634	0.0608282	0.576011
1552287_s_at	AFG3L1	AFG3 ATPase family gene 3-like 1 (S. cerevisiae)	5.58782	4.89864	5.22255	0.713636	0.00512217	0.381272
234103_at	KCNT2	Potassium channel, subfamily T, member 2	5.40938	5.00649	4.87284	0.713792	0.000984855	0.291948
228575_at	IL20RB	interleukin 20 receptor beta	4.06341	3.84607	3.4163	0.714032	0.107994	0.640839
227383_at	LOC727820	hypothetical protein LOC727820	6.83006	6.29007	6.37658	0.71404	0.00385971	0.361131
211734_s_at	FCER1A	Fc fragment of IgE, high affinity I, receptor for; alpha polypeptide	4.90141	4.51231	4.35821	0.714291	0.0504423	0.553796
219432_at	EVC	Ellis van Creveld syndrome	6.781	6.17422	6.36843	0.714298	0.164482	0.701407
1556491_at	---	---	2.99232	2.48968	2.51738	0.714334	0.0115952	0.412237
215630_at	---	---	4.04249	3.4646	3.61298	0.714418	0.0018319	0.32523
1556006_s_at	CSNK1A1	Casein kinase 1, alpha 1	4.34742	3.87437	3.85564	0.714619	0.0234082	0.472089
241242_at	---	---	3.32693	2.82283	2.85446	0.714829	3.53493e-05	0.264799
244655_at	LOC644192	Hypothetical LOC644192	3.8782	3.14173	3.54539	0.714901	0.0102904	0.403411
242801_at	---	---	5.00646	4.31323	4.64807	0.715013	0.0350034	0.513714
243046_at	---	---	4.88979	4.34773	4.44102	0.715114	0.00776261	0.389823
235761_at	---	---	7.20028	7.15755	6.45321	0.715516	0.136121	0.670474
240380_at	---	---	6.05165	5.35316	5.69838	0.715623	0.0569461	0.569394
241584_at	---	---	4.96705	4.43285	4.51529	0.71565	0.0646376	0.580006
244383_at	---	---	5.11124	4.54256	4.68018	0.715651	0.000489153	0.291948
239735_at	---	---	5.9076	5.1796	5.57216	0.715659	0.0114852	0.411727
1558111_at	MBNL1	muscleblind-like (Drosophila)	4.89866	4.26449	4.5073	0.715778	0.00695599	0.389823
236949_at	---	---	6.24644	5.49403	5.92608	0.715797	0.133298	0.66653
228607_at	OAS2	2'-5'-oligoadenylate synthetase 2, 69/71kDa	5.54719	5.46944	4.82219	0.715843	0.275992	0.775202	Chen, Gastroenterology 2005; Feld, Hepatology 2007; Honda, Gastroenterology 2010
236375_at	---	---	5.61709	5.02045	5.20345	0.715855	0.0383488	0.524234
238172_at	---	---	5.32932	4.71392	4.92784	0.71613	0.0035931	0.356345
1555759_a_at	CCL5	chemokine (C-C motif) ligand 5	8.5522	8.02698	8.09715	0.716304	0.136702	0.670478
228180_at	---	---	4.27708	3.56829	3.93272	0.716471	0.0118604	0.415185
234632_x_at	---	---	3.47083	2.78205	3.11521	0.716702	0.0321499	0.509013
231562_at	APOC2	Apolipoprotein C-II	7.94457	7.91065	7.19628	0.716779	0.0831569	0.60895
236694_at	CYorf15A	chromosome Y open reading frame 15A	3.89254	2.70784	3.83536	0.716977	0.30273	0.790721
1560986_a_at	---	---	5.93362	5.43125	5.46716	0.717016	0.00766398	0.389823
238736_at	REV3L	REV3-like, catalytic subunit of DNA polymerase zeta (yeast)	5.59482	4.75936	5.32874	0.717176	0.0695245	0.590347
1560763_at	---	---	4.26255	3.70649	3.82908	0.717255	0.0214307	0.466668
239999_at	---	---	5.13971	4.77147	4.59398	0.717388	0.0386157	0.525426
241595_at	---	---	5.84966	4.95716	5.61921	0.717618	0.0748852	0.5984
209318_x_at	PLAGL1	pleiomorphic adenoma gene-like 1	5.23077	4.72175	4.77158	0.718034	0.0277058	0.488487
230599_at	---	---	6.09399	5.43103	5.72743	0.718117	0.0225848	0.471035
222316_at	---	---	6.35108	5.61235	6.0305	0.71828	0.0763061	0.600214
1566725_at	---	---	4.08249	3.56554	3.62929	0.718414	0.00125432	0.309883
244625_at	---	---	4.7933	4.13663	4.42421	0.718503	0.00598009	0.386009
205951_at	MYH1	myosin, heavy chain 1, skeletal muscle, adult	3.3177	3.12147	2.6728	0.718646	0.431601	0.84892
235482_at	LOC400960	hypothetical gene supported by BC040598	5.89281	5.25105	5.51554	0.718742	0.00836935	0.390817
224701_at	PARP14	poly (ADP-ribose) polymerase family, member 14	8.25184	7.66399	7.84286	0.718941	0.024985	0.478359
1557238_s_at	---	---	4.85947	4.27665	4.44822	0.719177	0.00720375	0.389823
215754_at	SCARB2	scavenger receptor class B, member 2	6.08083	5.3101	5.78259	0.719254	0.0318709	0.506938
1559401_a_at	---	---	4.25335	3.54884	3.9154	0.719261	0.0534731	0.560074
201852_x_at	COL3A1	collagen, type III, alpha 1	8.80893	8.03307	8.51384	0.719281	0.100351	0.629298
1556744_a_at	---	---	5.45554	4.82171	5.07545	0.719345	0.0154192	0.439951
209040_s_at	PSMB8	proteasome (prosome, macropain) subunit, beta type, 8 (large multifunctional peptidase 7)	9.63758	9.05022	9.23019	0.719525	0.124545	0.657789
234710_s_at	PARP6	poly (ADP-ribose) polymerase family, member 6	5.47559	4.97988	5.01343	0.7196	0.047298	0.548349
1557828_a_at	C5orf28	Chromosome 5 open reading frame 28	5.24815	4.61779	4.86704	0.719675	0.00256915	0.344225
239624_at	---	---	5.1375	4.63185	4.68213	0.719855	0.0102846	0.403411
240221_at	CSNK1A1	Casein kinase 1, alpha 1	5.2618	4.70794	4.83575	0.719975	0.000682296	0.291948
214131_at	CYorf15B	chromosome Y open reading frame 15B	4.03624	2.97302	3.91591	0.720007	0.335764	0.809864
221971_x_at	AGAP10 /// AGAP4 /// AGAP5 /// AGAP9	ArfGAP with GTPase domain, ankyrin repeat and PH domain 10 /// ArfGAP with GTPase domain, ankyrin repeat and PH domain 4 /// ArfGAP with GTPase domain, ankyrin repeat and PH domain 5 /// ArfGAP with GTPase domain, ankyrin repeat and PH domain 9	7.8885	7.16174	7.56637	0.720033	0.00759609	0.389823
1560622_at	---	---	5.05387	4.36294	4.7108	0.720205	0.00875742	0.396163
232914_s_at	SYTL2	synaptotagmin-like 2	6.69659	6.13005	6.27915	0.720288	0.000659692	0.291948
232193_at	GSTT1	Glutathione S-transferase theta 1	3.81406	3.36524	3.3261	0.720324	0.0889138	0.615447
209006_s_at	C1orf63	chromosome 1 open reading frame 63	7.25134	6.70456	6.82403	0.720907	0.0108742	0.404478
228271_at	---	---	6.21664	5.57511	5.84635	0.720962	0.0101386	0.403411
231398_at	SLC22A7	solute carrier family 22 (organic anion transporter), member 7	11.2519	10.7191	10.8165	0.720969	0.0322114	0.509013
216557_x_at	IGHA1 /// IGHD /// IGHG1 /// IGHG3 /// IGHM /// IGHV4-31 /// LOC100290320 /// LOC100291190	immunoglobulin heavy constant alpha 1 /// immunoglobulin heavy constant delta /// immunoglobulin heavy constant gamma 1 (G1m marker) /// immunoglobulin heavy constant gamma 3 (G3m marker) /// immunoglobulin heavy constant mu /// immunoglobulin heavy variable 4-31 /// similar to hCG2042717 /// similar to immunoglobulin heavy locus	7.27058	6.54104	6.95337	0.721047	0.221274	0.740818
232396_at	---	---	5.87372	5.10808	5.57832	0.721092	0.0145964	0.433674
203624_at	SFRS17A	splicing factor, arginine/serine-rich 17A	7.91416	7.29589	7.5304	0.721117	0.000464734	0.291948
219332_at	MICALL2	MICAL-like 2	7.38353	6.65494	7.06681	0.721379	0.0171708	0.451213
243303_at	---	---	5.30316	4.74531	4.88414	0.721424	0.00178205	0.32523
241435_at	---	---	5.91901	5.01838	5.70629	0.721622	0.0588612	0.572736
229449_at	---	---	6.72314	6.47329	6.12005	0.721652	0.0889001	0.615447
206291_at	NTS	neurotensin	4.77772	4.00887	4.48674	0.721873	0.274744	0.774559
240383_at	UBE2D3	ubiquitin-conjugating enzyme E2D 3 (UBC4/5 homolog, yeast)	5.99086	5.39623	5.59548	0.721913	0.0219196	0.469997
234033_at	---	---	5.71324	5.08335	5.33909	0.721942	0.0268382	0.486538
202307_s_at	TAP1	transporter 1, ATP-binding cassette, sub-family B (MDR/TAP)	8.01808	7.30993	7.69105	0.72199	0.13702	0.670478
239243_at	ZNF638	zinc finger protein 638	6.19277	5.51752	5.84607	0.722011	0.033868	0.511296
208151_x_at	DDX17	DEAD (Asp-Glu-Ala-Asp) box polypeptide 17	5.79025	5.52055	5.20022	0.722014	0.104099	0.637208
232865_at	AFF4	AF4/FMR2 family, member 4	5.31261	4.74988	4.89844	0.722025	0.03899	0.525654
228173_at	---	---	5.30371	4.61122	4.96753	0.722071	0.00436291	0.369611
225496_s_at	SYTL2	synaptotagmin-like 2	5.88143	5.29538	5.48165	0.722151	0.00179195	0.32523
232597_x_at	SFRS2IP	splicing factor, arginine/serine-rich 2, interacting protein	6.96642	6.37614	6.56992	0.72238	0.0121809	0.415577
241965_at	---	---	5.71302	5.11412	5.32181	0.722417	0.00669247	0.389823
240843_at	---	---	5.62556	4.98937	5.25679	0.722439	0.00602338	0.386009
229777_at	CLRN3	clarin 3	9.22146	9.17699	8.49772	0.722456	0.171321	0.706219
1563708_at	SFXN5	sideroflexin 5	5.56653	4.83458	5.25606	0.722702	0.0195616	0.458933
239014_at	CCAR1	Cell division cycle and apoptosis regulator 1	5.23084	4.6077	4.85597	0.722981	0.115241	0.648546
1558854_a_at	---	---	4.20735	3.56319	3.84515	0.722998	0.0113555	0.410681
243009_at	---	---	5.14625	4.56943	4.74375	0.723033	0.0137068	0.425733
239660_at	RALGAPA2	Ral GTPase activating protein, alpha subunit 2 (catalytic)	5.35685	4.73481	4.98161	0.723074	0.00901521	0.396163
1559820_at	---	---	4.74615	4.13425	4.36483	0.723076	0.000611397	0.291948
242133_s_at	---	---	5.7405	5.02769	5.41981	0.723099	0.0073258	0.389823
1556672_a_at	RBM6	RNA binding motif protein 6	5.32329	4.59059	5.01467	0.723142	0.0679146	0.587247
233428_at	---	---	4.80373	4.16183	4.4407	0.723163	0.0273867	0.488487
206848_at	FAM36A /// HOXA7	family with sequence similarity 36, member A /// homeobox A7	5.56511	4.82714	5.25987	0.72321	0.00870443	0.396163
244840_x_at	DOCK4	dedicator of cytokinesis 4	5.15367	4.66918	4.69692	0.723389	0.0303538	0.501242
238412_at	RRN3P3	RNA polymerase I transcription factor homolog (S. cerevisiae) pseudogene 3	6.93911	6.17723	6.64885	0.723406	0.0294188	0.497099
205583_s_at	ALG13	asparagine-linked glycosylation 13 homolog (S. cerevisiae)	7.0996	6.5677	6.67145	0.723438	0.00192473	0.330454
235716_at	---	---	6.79136	6.1726	6.41586	0.723606	0.00116095	0.302133
220035_at	NUP210	nucleoporin 210kDa	6.2226	5.54586	5.88277	0.723883	0.0145971	0.433674
213939_s_at	RUFY3	RUN and FYVE domain containing 3	6.86792	6.14645	6.55559	0.724089	0.0394744	0.529534
233262_at	---	---	4.11776	3.61934	3.67182	0.72416	0.0239879	0.473486
220609_at	LOC202181	hypothetical protein LOC202181	3.74457	3.00051	3.44632	0.724259	0.0376053	0.522923
227384_s_at	LOC727820	hypothetical protein LOC727820	6.70238	6.05638	6.34559	0.724345	0.0170718	0.450499
209343_at	EFHD1	EF-hand domain family, member D1	7.0915	6.49674	6.70537	0.724791	0.219551	0.739104
242907_at	---	---	6.65638	6.095	6.25028	0.724806	0.0330746	0.509928
229513_at	STRBP	spermatid perinuclear RNA binding protein	4.91604	4.131	4.64469	0.724982	0.0141479	0.430817
215268_at	KIAA0754	KIAA0754	3.65249	2.85736	3.38728	0.725008	0.0496144	0.55126
213931_at	ID2 /// ID2B	inhibitor of DNA binding 2, dominant negative helix-loop-helix protein /// inhibitor of DNA binding 2B, dominant negative helix-loop-helix protein (pseudogene)	8.37362	7.71335	8.02825	0.725247	0.0555826	0.567828
213998_s_at	DDX17	DEAD (Asp-Glu-Ala-Asp) box polypeptide 17	6.33114	5.60482	6.02543	0.725255	0.0759706	0.600214
215012_at	ZNF451	zinc finger protein 451	6.98131	6.40232	6.58849	0.725659	0.0147907	0.435568
235374_at	MDH1	Malate dehydrogenase 1, NAD (soluble)	6.13309	5.45831	5.79797	0.72573	0.0298195	0.497467
244690_at	---	---	4.46973	3.93439	4.0513	0.725841	0.0638842	0.579103
225224_at	C20orf112	chromosome 20 open reading frame 112	6.64264	6.0535	6.25679	0.725938	0.0312813	0.503878
238714_at	---	---	5.85276	5.20874	5.5001	0.726021	0.0156948	0.442115
243834_at	TNRC6A	trinucleotide repeat containing 6A	6.54817	5.95675	6.16439	0.726155	0.0303215	0.501077
236153_at	---	---	5.45236	4.88153	5.0563	0.72618	0.062332	0.576633
221850_x_at	AGAP11 /// AGAP4 /// AGAP6 /// AGAP7 /// AGAP8	ankyrin repeat and GTPase domain Arf GTPase activating protein 11 /// ArfGAP with GTPase domain, ankyrin repeat and PH domain 4 /// ArfGAP with GTPase domain, ankyrin repeat and PH domain 6 /// ArfGAP with GTPase domain, ankyrin repeat and PH domain 7 /// ArfGAP with GTPase domain, ankyrin repeat and PH domain 8	7.87623	7.17411	7.55897	0.726189	0.00872951	0.396163
1559101_at	FYN	FYN oncogene related to SRC, FGR, YES	4.92867	4.3158	4.55857	0.72641	0.00172389	0.32523
1569041_at	---	---	3.81793	3.21201	3.44369	0.726422	0.00238357	0.333109
213046_at	PABPN1	poly(A) binding protein, nuclear 1	7.59752	6.9878	7.22563	0.726445	0.00242077	0.333109
214916_x_at	IGH@ /// IGHA1 /// IGHA2 /// IGHG1 /// IGHG3 /// IGHM /// IGHV3-23 /// IGHV4-31 /// LOC100290375	immunoglobulin heavy locus /// immunoglobulin heavy constant alpha 1 /// immunoglobulin heavy constant alpha 2 (A2m marker) /// immunoglobulin heavy constant gamma 1 (G1m marker) /// immunoglobulin heavy constant gamma 3 (G3m marker) /// immunoglobulin heavy constant mu /// immunoglobulin heavy variable 3-23 /// immunoglobulin heavy variable 4-31 /// similar to hCG2042717	7.06717	6.35146	6.75902	0.726488	0.145017	0.678718
243293_at	---	---	5.60466	4.96567	5.25071	0.726564	0.0100259	0.403411
214295_at	KIAA0485	hypothetical LOC57235	4.50418	3.8969	4.13155	0.726675	0.182675	0.713993
242837_at	SFRS4	Splicing factor, arginine/serine-rich 4	6.47034	5.76144	6.15917	0.726826	0.0334133	0.509928
217480_x_at	LOC100287723 /// LOC642424 /// LOC642838	similar to Ig kappa chain /// similar to hCG1742442 /// similar to hCG1742442	8.06903	7.4231	7.72037	0.72692	0.143956	0.677188
244498_x_at	LOC440300	chondroitin sulfate proteoglycan 4 pseudogene	4.61249	4.09771	4.18521	0.726939	0.00140929	0.318872
219482_at	SETD4	SET domain containing 4	5.78339	5.12235	5.44461	0.727172	0.0018384	0.32523
242492_at	---	---	5.19389	4.43661	4.91311	0.727253	0.0366971	0.518954
238738_at	PSMD7	Proteasome (prosome, macropain) 26S subunit, non-ATPase, 7	4.84827	4.40057	4.38258	0.727521	0.00352961	0.356345
239348_at	---	---	4.2306	3.61815	3.86396	0.727579	0.019823	0.459791
233770_at	---	---	4.86921	4.28258	4.48755	0.727731	0.109622	0.643542
227668_at	C17orf56	chromosome 17 open reading frame 56	6.02831	5.45989	5.63593	0.727797	0.00777389	0.389823
232307_at	---	---	6.14914	5.51634	5.79546	0.727819	0.0231225	0.472089
219863_at	HERC5	hect domain and RLD 5	8.75847	8.58936	8.12669	0.727853	0.398548	0.838448
226040_at	---	---	6.53928	5.76716	6.26945	0.727902	0.135088	0.668987
242956_at	IDH1	Isocitrate dehydrogenase 1 (NADP+), soluble	6.03652	5.55165	5.5945	0.727953	0.0454549	0.544726
226808_at	ZNF862	zinc finger protein 862	6.35281	5.67598	6.0264	0.728088	0.0170714	0.450499
211813_x_at	DCN	decorin	11.0517	10.5525	10.6192	0.728251	0.0783022	0.603384
219632_s_at	TRPV1	transient receptor potential cation channel, subfamily V, member 1	6.66386	6.23222	6.19139	0.728419	0.041289	0.535921
220276_at	RERGL	RERG/RAS-like	4.3196	3.86299	3.86242	0.728519	0.0352457	0.514775
238894_at	---	---	5.38569	5.00007	4.88596	0.728532	0.0381695	0.524234
211896_s_at	DCN	decorin	10.124	9.72111	9.63534	0.728741	0.0940781	0.622303
224321_at	TMEFF2	transmembrane protein with EGF-like and two follistatin-like domains 2	6.72943	6.20884	6.31138	0.72875	0.110179	0.643745
1562337_at	OR7D2	olfactory receptor, family 7, subfamily D, member 2	5.2574	4.74597	4.8339	0.728764	0.152491	0.687358
226877_at	RPL32P3	ribosomal protein L32 pseudogene 3	5.88315	5.21435	5.55409	0.728771	0.0518302	0.556567
204537_s_at	GABRE	gamma-aminobutyric acid (GABA) A receptor, epsilon	5.41826	4.97079	4.95678	0.72889	0.00083897	0.291948
200904_at	HLA-E	major histocompatibility complex, class I, E	9.66383	9.06511	9.29313	0.728901	0.0469181	0.546206
228824_s_at	PTGR1	prostaglandin reductase 1	10.7705	10.6217	10.13	0.728921	0.0179716	0.453205
239476_at	---	---	7.04784	6.14114	6.86362	0.729435	0.062673	0.576633
215336_at	AKAP11	A kinase (PRKA) anchor protein 11	4.86121	4.31538	4.46118	0.729661	0.00221926	0.333109
1558937_s_at	---	---	5.0378	4.66265	4.53611	0.729898	0.0367866	0.519124
218280_x_at	HIST2H2AA3 /// HIST2H2AA4	histone cluster 2, H2aa3 /// histone cluster 2, H2aa4	8.53896	8.18012	8.02778	0.729988	0.0489794	0.550318
215314_at	---	---	4.84346	4.17111	4.52052	0.730031	0.0355843	0.517147
239544_at	---	---	5.68201	5.23805	5.2229	0.730304	0.00309859	0.34665
236355_s_at	---	---	4.82375	4.22906	4.45528	0.730371	0.00324155	0.348273
211996_s_at	LOC100132247 /// LOC348162 /// LOC613037 /// LOC728888 /// NPIPL3	similar to Uncharacterized protein KIAA0220 /// hypothetical protein 348162 /// nuclear pore complex interacting protein pseudogene /// similar to acyl-CoA synthetase medium-chain family member 2 /// nuclear pore complex interacting protein-like 3	8.73232	7.66435	8.64804	0.730438	0.148278	0.683048
231187_at	SLC28A1	solute carrier family 28 (sodium-coupled nucleoside transporter), member 1	6.16985	6.01252	5.53964	0.730584	0.235015	0.748908
208912_s_at	CNP	2',3'-cyclic nucleotide 3' phosphodiesterase	8.48679	7.99766	8.05612	0.730726	0.0590891	0.572736
238589_s_at	---	---	5.95622	5.41167	5.55914	0.730834	0.00273186	0.345799
213519_s_at	LAMA2	laminin, alpha 2	5.18295	4.77378	4.70477	0.730875	0.0260128	0.484389
204141_at	TUBB2A	tubulin, beta 2A	9.39396	9.18191	8.79761	0.730907	0.14224	0.675134
214836_x_at	IGK@ /// IGKC	immunoglobulin kappa locus /// immunoglobulin kappa constant	10.1342	9.4678	9.81074	0.730975	0.184589	0.715611
208922_s_at	NXF1	nuclear RNA export factor 1	7.4658	6.767	7.16194	0.731048	0.00394816	0.361852
203150_at	RABEPK	Rab9 effector protein with kelch motifs	7.87701	7.74136	7.23601	0.731287	0.181582	0.712277
213994_s_at	SPON1	spondin 1, extracellular matrix protein	3.55757	3.04861	3.14087	0.731386	0.00646911	0.389823
242362_at	---	---	6.2036	5.55592	5.87016	0.731391	0.016496	0.448166
225818_s_at	TBRG1	transforming growth factor beta regulator 1	5.85352	5.28043	5.47591	0.731579	0.0258483	0.483321
233595_at	USP34	ubiquitin specific peptidase 34	6.24644	5.62814	5.89602	0.731596	0.0449453	0.542423
216211_at	---	---	5.8029	5.33307	5.36349	0.731625	0.0181151	0.453205
210026_s_at	CARD10	caspase recruitment domain family, member 10	7.36472	6.75932	7.00673	0.731654	0.0595583	0.573525
206239_s_at	SPINK1	serine peptidase inhibitor, Kazal type 1	3.43358	2.95552	2.9997	0.731814	0.0449424	0.542423
219628_at	ZMAT3	zinc finger, matrin type 3	7.41506	7.06777	6.90276	0.731829	0.053731	0.561055
243819_at	---	---	4.50318	3.9149	4.13593	0.731971	0.0110803	0.408383
218656_s_at	LHFP	lipoma HMGIC fusion partner	6.16613	5.68197	5.7365	0.732001	0.00600074	0.386009
211663_x_at	PTGDS	prostaglandin D2 synthase 21kDa (brain)	6.52737	5.96151	6.14714	0.732125	0.138887	0.672421
236490_at	---	---	6.05578	5.63179	5.59045	0.732132	0.0343751	0.511296
202519_at	MLXIP	MLX interacting protein	7.37652	6.63858	7.09963	0.732151	0.0551025	0.565865
232347_x_at	---	---	6.63426	6.14059	6.2109	0.732182	0.0193239	0.458933
233302_at	---	---	3.59819	2.96252	3.26059	0.73236	0.00844171	0.390817
233874_at	SLAIN2	SLAIN motif family, member 2	5.36389	4.73018	5.02535	0.732433	0.0707892	0.591341
236474_at	---	---	6.17351	5.41712	5.90857	0.732433	0.0611642	0.576383
236470_at	---	---	5.13622	4.53076	4.78091	0.732493	0.0157649	0.443313
232449_at	BCO2	beta-carotene oxygenase 2	7.86615	8.23467	6.9266	0.732539	0.379985	0.831981
1557505_a_at	---	---	3.43246	2.96434	2.9952	0.732637	0.00450126	0.374398
220940_at	ANKRD36B	ankyrin repeat domain 36B	6.41679	5.72239	6.11533	0.732644	0.0154394	0.439951
1558815_at	SORBS2	sorbin and SH3 domain containing 2	7.20043	6.57178	6.85973	0.732711	0.236871	0.749694
232879_at	CRTC3	CREB regulated transcription coactivator 3	3.50606	2.94468	3.1251	0.732746	0.0069203	0.389823
228131_at	ERCC1	excision repair cross-complementing rodent repair deficiency, complementation group 1 (includes overlapping antisense sequence)	5.57532	4.87248	5.27939	0.732796	0.00974245	0.401911
207131_x_at	GGT1	gamma-glutamyltransferase 1	7.15349	6.7857	6.65682	0.732884	0.0358752	0.517316
217753_s_at	RPS26	ribosomal protein S26	11.9091	11.7891	11.2641	0.732965	0.0352289	0.514775
242297_at	RREB1	ras responsive element binding protein 1	5.84473	5.15187	5.54342	0.732986	0.0196053	0.458933
212380_at	FTSJD2	FtsJ methyltransferase domain containing 2	7.84622	7.28203	7.46869	0.733302	0.0224923	0.471035
242052_at	---	---	4.03532	3.538	3.61794	0.733384	0.00766459	0.389823
244061_at	---	---	4.01671	3.37934	3.68415	0.733638	0.00844182	0.390817
240182_at	---	---	3.59997	2.90887	3.30009	0.733779	0.0429508	0.53906
221427_s_at	CCNL2	cyclin L2	7.38647	6.7424	7.05927	0.734064	0.020851	0.463112
1557996_at	LOC100132832	postmeiotic segregation increased 2-like 5-like	6.10142	5.19087	5.93444	0.734168	0.0911252	0.618428
212488_at	COL5A1	collagen, type V, alpha 1	6.00782	5.34216	5.69392	0.734173	0.0964201	0.624425
207156_at	HIST1H2AG	histone cluster 1, H2ag	3.80362	3.69022	3.15842	0.734192	0.186126	0.71612
222793_at	DDX58	DEAD (Asp-Glu-Ala-Asp) box polypeptide 58	7.07893	6.73714	6.57129	0.734356	0.0499714	0.552451	Feld, Hepatology 2007
221500_s_at	STX16	syntaxin 16	8.14559	7.52171	7.80751	0.734455	0.00201821	0.333109
1558732_at	MAP4K4	mitogen-activated protein kinase kinase kinase kinase 4	5.27726	4.50436	5.02866	0.734476	0.0119116	0.415577
236184_at	---	---	5.6485	5.05427	5.29276	0.734499	0.0173171	0.451333
235138_at	---	---	6.65706	6.016	6.32946	0.734511	0.0495954	0.55126
205116_at	LAMA2	laminin, alpha 2	5.50087	4.95089	5.11945	0.734771	0.0026927	0.345799
226693_at	SDHAP2	succinate dehydrogenase complex, subunit A, flavoprotein pseudogene 2	7.13618	6.61886	6.73599	0.735033	0.0291322	0.496742
244878_at	---	---	4.18438	3.69602	3.76699	0.735092	0.0173342	0.451333
1558613_at	---	---	6.89887	6.22881	6.59068	0.735148	0.0491742	0.551123
1294_at	UBA7	ubiquitin-like modifier activating enzyme 7	7.27845	6.71514	6.90624	0.735157	0.0380191	0.524234
1562063_x_at	KIAA1245 /// LOC200030 /// NBPF1 /// NBPF10 /// NBPF11 /// NBPF8 /// NBPF9	KIAA1245 /// neuroblastoma breakpoint family, member 11-like /// neuroblastoma breakpoint family, member 1 /// neuroblastoma breakpoint family, member 10 /// neuroblastoma breakpoint family, member 11 /// neuroblastoma breakpoint family, member 8 /// neuroblastoma breakpoint family, member 9	7.04077	6.44026	6.69149	0.735355	0.0108802	0.404478
239851_at	---	---	3.8187	3.26631	3.44093	0.735478	0.00557407	0.384042
239649_at	---	---	4.23108	3.56613	3.92118	0.735578	0.00490129	0.375465
207078_at	MED6	mediator complex subunit 6	3.83606	3.27837	3.46226	0.735725	0.0360241	0.517785
203088_at	FBLN5	fibulin 5	6.37153	6.06886	5.84508	0.73584	0.050332	0.553296
242612_at	---	---	3.80894	3.23575	3.44535	0.736018	0.00272547	0.345799
234105_at	---	---	3.40621	2.7726	3.07898	0.736052	0.00972939	0.401911
242480_at	---	---	4.16698	3.64303	3.77462	0.736261	0.000875139	0.291948
209993_at	ABCB1	ATP-binding cassette, sub-family B (MDR/TAP), member 1	7.32965	6.66668	7.02093	0.736334	0.205562	0.727516
1561334_at	LOC285181	hypothetical protein LOC285181	4.67252	4.25681	4.21564	0.736399	0.0160843	0.446779
230742_at	---	---	3.75174	3.09935	3.43696	0.736431	0.00468367	0.374434
226365_at	---	---	6.23715	5.72669	5.83738	0.736481	0.139748	0.672818
205248_at	DOPEY2	dopey family member 2	4.9496	4.52596	4.49794	0.736546	0.175597	0.709017
1556054_at	---	---	3.28573	2.84977	2.84173	0.736628	0.0113899	0.410766
228030_at	RBM6	RNA binding motif protein 6	6.11668	5.41046	5.83485	0.736634	0.00617821	0.386602
217405_x_at	GPLD1	glycosylphosphatidylinositol specific phospholipase D1	6.84013	6.18676	6.52665	0.736656	0.0448223	0.542423
205047_s_at	ASNS	asparagine synthetase (glutamine-hydrolyzing)	4.86086	4.3849	4.44114	0.73672	0.0493437	0.551123
224225_s_at	ETV7	ets variant 7	5.11476	4.71531	4.64915	0.736726	0.132088	0.665678
240161_s_at	CDC20B	Cell division cycle 20 homolog B (S. cerevisiae)	3.77643	3.06764	3.49661	0.736785	0.119859	0.653697
230712_at	NBPF1	neuroblastoma breakpoint family, member 1	6.72297	6.09229	6.39642	0.736827	0.0638695	0.579103
209403_at	TBC1D3 /// TBC1D3C /// TBC1D3F /// TBC1D3H	TBC1 domain family, member 3 /// TBC1 domain family, member 3C /// TBC1 domain family, member 3F /// TBC1 domain family, member 3H	7.11719	6.52152	6.76983	0.736889	0.00157334	0.32523
1570103_at	---	---	3.49277	2.94701	3.11579	0.736995	0.00191778	0.330454
238560_at	CALCOCO2	calcium binding and coiled-coil domain 2	5.67737	5.27243	5.21762	0.737546	0.000388998	0.291948
1554007_at	---	---	5.06375	4.48446	4.70884	0.737616	0.0532308	0.559885
237456_at	---	---	5.89285	5.25101	5.57591	0.737761	0.0274312	0.488487
231316_at	---	---	5.99882	5.42775	5.64033	0.738047	0.00372429	0.36024
237464_at	---	---	5.40493	4.66758	5.14652	0.738156	0.0245448	0.476475
228152_s_at	DDX60L	DEAD (Asp-Glu-Ala-Asp) box polypeptide 60-like	7.27387	6.78381	6.86729	0.738217	0.184917	0.715789
215743_at	NMT2	N-myristoyltransferase 2	5.50497	4.9499	5.13783	0.738353	0.0192191	0.458364
236439_at	---	---	5.08529	4.21622	4.90672	0.738407	0.100865	0.631398
227091_at	CCDC146	coiled-coil domain containing 146	5.68212	5.34598	5.18385	0.738425	0.00702926	0.389823
227891_s_at	TAF15	TAF15 RNA polymerase II, TATA box binding protein (TBP)-associated factor, 68kDa	6.56797	5.98133	6.2201	0.738462	0.00292413	0.34665
239784_at	---	---	4.61606	4.15027	4.19613	0.738604	0.0127063	0.41645
212012_at	PXDN	peroxidasin homolog (Drosophila)	7.32073	6.75137	6.96336	0.738739	0.0119369	0.415577
203234_at	UPP1	uridine phosphorylase 1	5.716	5.27013	5.28462	0.738766	0.00569465	0.384042
241359_at	TLCD2	TLC domain containing 2	5.55746	5.28824	5.02009	0.738766	0.0991581	0.628256
1568592_at	TRIM69	tripartite motif-containing 69	7.79972	7.40437	7.33809	0.738787	0.203136	0.72484
238769_at	---	---	4.5917	4.09379	4.19171	0.738815	0.00834657	0.390817
235925_at	---	---	6.04961	5.35133	5.76985	0.73882	0.13033	0.664603
204472_at	GEM	GTP binding protein overexpressed in skeletal muscle	6.11792	5.42976	5.83231	0.738891	0.0826087	0.608785
209919_x_at	GGT1	gamma-glutamyltransferase 1	7.23592	6.7723	6.81596	0.739008	0.054196	0.562815
225796_at	PXK	PX domain containing serine/threonine kinase	5.00028	4.60709	4.53813	0.739035	0.0829138	0.608785
228384_s_at	PYROXD2	pyridine nucleotide-disulphide oxidoreductase domain 2	6.38687	5.92687	5.96515	0.739142	0.230112	0.746345
205342_s_at	SULT1C2	sulfotransferase family, cytosolic, 1C, member 2	3.11337	2.79839	2.60482	0.7392	0.123289	0.657482
235571_at	---	---	5.77225	5.01852	5.52697	0.739208	0.0762016	0.600214
242369_x_at	---	---	6.72876	6.24101	6.32444	0.739383	0.0180957	0.453205
210944_s_at	CAPN3	calpain 3, (p94)	7.33722	7.03221	6.82343	0.739442	0.0510649	0.555278
211908_x_at	IGKV3-20	Immunoglobulin kappa variable 3-20	7.59385	6.94934	7.28417	0.73957	0.151627	0.686389
243016_at	---	---	5.67359	4.9997	5.38158	0.739584	0.0519267	0.556567
205110_s_at	FGF13	fibroblast growth factor 13	4.50326	4.02541	4.09392	0.739678	0.0408062	0.535479
230884_s_at	SPG7	spastic paraplegia 7 (pure and complicated autosomal recessive)	5.45597	4.89334	5.09752	0.739685	0.0466309	0.546206
234562_x_at	---	---	6.52844	5.95622	6.17574	0.739685	0.0263803	0.485265
218986_s_at	DDX60	DEAD (Asp-Glu-Ala-Asp) box polypeptide 60	8.53962	8.22414	8.03334	0.739831	0.45267	0.859888
233303_at	---	---	5.64375	4.99402	5.33814	0.739873	0.0126934	0.41645
1554250_s_at	TRIM73	tripartite motif-containing 73	5.68195	5.02776	5.37926	0.739949	0.00479777	0.374434
220184_at	NANOG	Nanog homeobox	4.75535	4.33123	4.31484	0.74002	0.00485495	0.374434
215418_at	PARVA	parvin, alpha	5.06564	4.69661	4.59253	0.740167	0.00102288	0.293679
201967_at	RBM6	RNA binding motif protein 6	7.80811	7.12662	7.52269	0.740235	0.00834507	0.390817
204017_at	KDELR3	KDEL (Lys-Asp-Glu-Leu) endoplasmic reticulum protein retention receptor 3	5.89733	5.68251	5.33208	0.740288	0.0836128	0.609498
244610_x_at	---	---	3.31266	2.83169	2.90745	0.7404	0.00573381	0.384042
240478_at	---	---	5.61149	4.89771	5.34652	0.740577	0.00898716	0.396163
213932_x_at	HLA-A	major histocompatibility complex, class I, A	13.0005	12.4133	12.6599	0.740675	0.0651202	0.580194
212013_at	PXDN	peroxidasin homolog (Drosophila)	6.71155	6.07567	6.401	0.740949	0.0318927	0.507049
241751_at	OFD1	oral-facial-digital syndrome 1	3.38218	2.93025	2.96141	0.740997	0.00625015	0.388966
241205_at	---	---	4.5526	4.18748	4.08022	0.741152	0.035875	0.517316
239264_at	---	---	3.84821	3.22701	3.52999	0.741318	0.0249705	0.478359
203697_at	FRZB	frizzled-related protein	5.22584	4.59548	4.9132	0.741343	0.119684	0.653697
243431_at	---	---	3.89544	3.24861	3.59276	0.741369	0.0112012	0.409743
1559496_at	PPA2	pyrophosphatase (inorganic) 2	5.49481	5.07056	5.05926	0.741588	0.0343092	0.511296
231904_at	U2AF1	U2 small nuclear RNA auxiliary factor 1	5.84908	5.14258	5.5833	0.74172	0.0145938	0.433674
206279_at	PRKY	protein kinase, Y-linked	4.4219	3.78612	4.11389	0.741788	0.0443156	0.540953
213737_x_at	LOC728498	Golgin subfamily A member 8-like protein 1	8.55878	7.96651	8.22523	0.74197	0.034038	0.511296
240494_at	---	---	5.45976	4.89789	5.10812	0.742015	0.0146351	0.434048
1558220_at	MUC20	Mucin 20, cell surface associated	6.0054	5.51429	5.61137	0.742038	0.0091953	0.397444
227208_at	CCDC84	coiled-coil domain containing 84	6.82774	6.33265	6.43614	0.742054	0.000552511	0.291948
240245_at	---	---	4.1825	3.83691	3.70122	0.742058	0.00510295	0.380671
217427_s_at	HIRA	HIR histone cell cycle regulation defective homolog A (S. cerevisiae)	5.95471	5.45619	5.56556	0.742178	0.2292	0.745529
231008_at	UNC5CL	Unc-5 homolog C (C. elegans)-like	6.49092	5.9176	6.14686	0.742244	0.0906307	0.617675
1562529_s_at	---	---	7.39151	6.64625	7.15083	0.742314	0.182037	0.713325
203610_s_at	TRIM38	tripartite motif-containing 38	6.33707	5.89295	5.91617	0.742465	0.0196648	0.458933
214842_s_at	---	---	7.9718	7.35277	7.6559	0.742482	0.251951	0.760625
204284_at	PPP1R3C	protein phosphatase 1, regulatory (inhibitor) subunit 3C	9.52046	9.52712	8.82917	0.742488	0.201538	0.723826
1565778_at	ABCA8	ATP-binding cassette, sub-family A (ABC1), member 8	4.78068	4.27927	4.39435	0.742523	0.0579305	0.570554
242018_at	---	---	3.74788	3.29919	3.32995	0.74254	0.00386858	0.361131
212843_at	NCAM1	neural cell adhesion molecule 1	5.43251	4.95264	5.03332	0.742549	0.01865	0.455807
230713_at	---	---	4.71487	4.10286	4.39533	0.742663	0.0115817	0.412237
207705_s_at	NINL	ninein-like	7.55959	6.90317	7.26712	0.742799	0.119749	0.653697
238880_at	GTF3A	general transcription factor IIIA	6.80667	6.15929	6.50912	0.742912	0.0207891	0.463112
212713_at	MFAP4	microfibrillar-associated protein 4	6.18778	5.63483	5.83359	0.742918	0.0625558	0.576633
1559362_at	---	---	4.97968	4.40715	4.6374	0.742969	0.0208855	0.463112
1564933_at	---	---	5.48812	4.84945	5.18584	0.743072	0.0327205	0.509928
214235_at	CYP3A5	cytochrome P450, family 3, subfamily A, polypeptide 5	10.9073	10.2525	10.6148	0.743106	0.0775683	0.602044
211959_at	IGFBP5	insulin-like growth factor binding protein 5	7.71008	7.21374	7.3226	0.743137	0.0768299	0.601309
223494_at	MGEA5	meningioma expressed antigen 5 (hyaluronidase)	7.10093	6.38943	6.8428	0.743221	0.0248159	0.477936
239739_at	SNX24	sorting nexin 24	4.25903	3.74461	3.88325	0.74341	0.0437646	0.539573
211075_s_at	CD47	CD47 molecule	9.33594	8.89126	8.91854	0.743482	0.099083	0.628181
223551_at	PKIB	protein kinase (cAMP-dependent, catalytic) inhibitor beta	6.37494	5.91652	5.96588	0.743512	0.266979	0.770726
235193_at	---	---	4.5553	4.06392	4.16615	0.743555	0.0485468	0.550318
1565703_at	SMAD4	SMAD family member 4	4.5888	4.09155	4.20383	0.743767	0.0172342	0.451213
1556126_s_at	GPATCH2	G patch domain containing 2	5.18344	4.71891	4.77893	0.743798	0.0552162	0.56651
1559190_s_at	RDH13	retinol dehydrogenase 13 (all-trans/9-cis)	4.81172	4.31236	4.42817	0.743818	0.0312112	0.503878
236817_at	ADAT2	adenosine deaminase, tRNA-specific 2, TAD2 homolog (S. cerevisiae)	5.86776	5.20491	5.58255	0.743898	0.0332181	0.509928
210042_s_at	CTSZ	cathepsin Z	7.64957	7.01158	7.35043	0.744218	0.0760675	0.600214
241018_at	TMEM59	transmembrane protein 59	3.78463	3.28388	3.40327	0.744253	0.0187636	0.455807
242001_at	IDH1	Isocitrate dehydrogenase 1 (NADP+), soluble	4.41707	3.91736	4.03577	0.744476	0.015144	0.439335
202112_at	VWF	von Willebrand factor	6.31277	5.98595	5.82787	0.744519	0.177964	0.711379
237198_at	---	---	4.95639	4.42655	4.59359	0.74461	0.0406894	0.535479
243480_at	---	---	5.03012	4.50204	4.66698	0.744841	0.00949767	0.399201
1558385_at	---	---	3.62725	3.10522	3.2605	0.744851	0.00671786	0.389823
220777_at	KIF13A	kinesin family member 13A	4.62972	4.01885	4.31671	0.74499	0.0235818	0.472089
239392_s_at	POGK	pogo transposable element with KRAB domain	4.96378	4.44113	4.59789	0.745006	0.00531791	0.384042
217482_at	---	---	5.89653	5.3228	5.56138	0.745034	0.0133891	0.422003
202994_s_at	FBLN1	fibulin 1	5.69656	5.30711	5.25099	0.745084	0.0435117	0.539573
227148_at	PLEKHH2	pleckstrin homology domain containing, family H (with MyTH4 domain) member 2	3.29667	2.71459	2.9669	0.745157	0.0176496	0.453205
236000_s_at	---	---	4.79083	4.11201	4.52005	0.74546	0.0202751	0.460314
201438_at	COL6A3	collagen, type VI, alpha 3	7.63468	7.01816	7.32661	0.745491	0.0768662	0.601309
204931_at	TCF21	transcription factor 21	5.1921	4.89064	4.6956	0.745683	0.0572918	0.569545
1558738_at	NOL3	Nucleolar protein 3 (apoptosis repressor with CARD domain)	4.70531	4.08069	4.40287	0.745737	0.0342073	0.511296
208610_s_at	SRRM2	serine/arginine repetitive matrix 2	8.21058	7.15506	8.16674	0.745758	0.190054	0.717408
237157_at	---	---	4.41003	3.73492	4.13804	0.745788	0.0298989	0.498306
232138_at	MBNL2	Muscleblind-like 2 (Drosophila)	6.0243	5.40934	5.71646	0.745865	0.000919642	0.291948
1558410_s_at	---	---	4.70635	4.30786	4.26867	0.745879	0.0415184	0.536455
1555960_at	HINT1	histidine triad nucleotide binding protein 1	6.01372	5.56205	5.60831	0.745998	0.00069539	0.291948
235756_at	---	---	5.67588	5.15419	5.31257	0.746026	0.00591897	0.386009
226906_s_at	ARHGAP9	Rho GTPase activating protein 9	4.96067	4.55205	4.53004	0.746194	0.0171113	0.451098
232356_at	---	---	4.18686	3.68904	3.80984	0.746222	0.0321444	0.509013
232182_at	LOC286272	hypothetical protein LOC286272	3.9616	3.46491	3.58393	0.746235	0.00172942	0.32523
233219_at	---	---	5.7766	5.36358	5.34885	0.746271	0.0067573	0.389823
212359_s_at	KIAA0913	KIAA0913	8.20105	7.57596	7.90167	0.746635	0.00743131	0.389823
243929_at	---	---	4.90853	4.44483	4.51245	0.746679	0.155941	0.692711
237768_x_at	---	---	5.55234	4.95175	5.23875	0.746797	0.00418008	0.36526
237600_at	---	---	4.56438	3.85358	4.317	0.746822	0.0607203	0.576011
232094_at	C15orf29	chromosome 15 open reading frame 29	4.21749	3.8761	3.74863	0.746879	0.0101956	0.403411
227527_at	MLL2	myeloid/lymphoid or mixed-lineage leukemia 2	6.85204	6.09722	6.63169	0.747024	0.199069	0.723322
224288_x_at	FKSG49	FKSG49	7.48257	6.9034	7.15697	0.747067	0.039633	0.530396
227502_at	---	---	6.63238	6.31342	6.15096	0.747165	0.00310171	0.34665
218902_at	NOTCH1	Notch homolog 1, translocation-associated (Drosophila)	6.17369	5.47756	5.91863	0.747185	0.0636138	0.578512
239001_at	MGST1	Microsomal glutathione S-transferase 1	7.26697	6.76072	6.89843	0.747329	0.0811345	0.608142
209228_x_at	TUSC3	tumor suppressor candidate 3	5.88507	5.42059	5.49157	0.74736	0.154955	0.691116
243524_at	---	---	4.43955	3.93473	4.0704	0.747414	0.0171973	0.451213
212613_at	BTN3A2	butyrophilin, subfamily 3, member A2	7.60007	7.24664	7.14009	0.747414	0.104424	0.63748
232991_at	---	---	5.40836	4.84388	5.07521	0.747476	0.0452126	0.544112
207002_s_at	PLAGL1	pleiomorphic adenoma gene-like 1	4.75165	4.12559	4.45562	0.747535	0.0364009	0.517785
230187_s_at	---	---	6.66551	6.36126	6.17645	0.74755	0.0609732	0.576011
244700_at	---	---	4.0634	3.53451	3.70927	0.747601	0.00925211	0.397444
1556821_x_at	DLEU2	deleted in lymphocytic leukemia 2 (non-protein coding)	6.19813	5.56712	5.90583	0.747779	0.0331786	0.509928
221965_at	MPHOSPH9	M-phase phosphoprotein 9	6.32661	5.90567	5.90873	0.747926	0.029814	0.497467
239955_at	---	---	5.68811	5.13499	5.34994	0.748056	0.124438	0.657789
236205_at	ABCC6P1	ATP-binding cassette, sub-family C, member 6 pseudogene 1	7.94063	7.55537	7.5019	0.74811	0.310697	0.795206
232511_at	---	---	6.16341	5.6087	5.82641	0.748126	0.0226078	0.471035
229773_at	SNAP23	Synaptosomal-associated protein, 23kDa	4.31584	3.77164	3.97256	0.748134	0.00378115	0.361131
204786_s_at	IFNAR2	interferon (alpha, beta and omega) receptor 2	6.49019	5.89077	6.18026	0.748208	0.00313464	0.34665
1565717_s_at	FUS	fused in sarcoma	6.34344	5.60602	6.1168	0.748369	0.0410732	0.535738
232852_at	---	---	5.51071	4.90719	5.20418	0.748513	0.0677814	0.587157
204802_at	RRAD	Ras-related associated with diabetes	3.67728	3.2793	3.2478	0.748632	0.00223174	0.333109
231205_at	---	---	4.49366	3.95937	4.14615	0.748693	0.0675747	0.586872
221919_at	HNRNPA1	heterogeneous nuclear ribonucleoprotein A1	5.46619	4.82989	5.18005	0.748749	0.0184148	0.454923
206332_s_at	IFI16	interferon, gamma-inducible protein 16	7.90204	7.55728	7.44125	0.748836	0.181286	0.712072
211980_at	COL4A1	collagen, type IV, alpha 1	7.97613	7.34776	7.68563	0.748879	0.0839782	0.609949
230097_at	---	---	6.07103	5.37196	5.82301	0.748897	0.0194237	0.458933
237341_at	---	---	4.1201	3.63705	3.74315	0.749118	0.00603372	0.386009
240008_at	---	---	3.97704	3.34294	3.69079	0.749137	0.024029	0.473709
204060_s_at	PRKX /// PRKY	protein kinase, X-linked /// protein kinase, Y-linked	5.82508	5.19117	5.53879	0.74916	0.0458719	0.546185
242337_at	---	---	4.53248	3.92862	4.22825	0.749196	0.00388326	0.361513
227922_x_at	LOC441124	Hypothetical gene supported by AK093729; BX647918	6.8882	6.3024	6.57319	0.749213	0.0105491	0.403607
206629_at	ADAMTSL2	ADAMTS-like 2	5.29992	4.78138	4.9447	0.749259	0.0123833	0.415577
1556035_s_at	ZNF207	zinc finger protein 207	6.83976	6.37786	6.45065	0.749286	0.0207212	0.463112
201893_x_at	DCN	decorin	11.3267	10.8927	10.9213	0.749404	0.0677597	0.587136
243435_at	KCNQ1OT1	KCNQ1 overlapping transcript 1 (non-protein coding)	6.38145	5.83047	6.04647	0.749508	0.00322291	0.348273
242243_at	---	---	3.56672	3.15212	3.15013	0.74958	0.0555978	0.567828
201426_s_at	VIM	vimentin	10.2122	9.62339	9.90073	0.749791	0.0908271	0.617675
202771_at	FAM38A	family with sequence similarity 38, member A	7.22036	6.5965	6.93031	0.7499	0.0418828	0.538051
236699_at	---	---	6.2354	5.50662	6.00851	0.749968	0.0672055	0.5859
241937_s_at	WDR4	WD repeat domain 4	4.88235	4.36214	4.53072	0.750101	0.0120069	0.415577
240263_at	---	---	4.12074	3.65337	3.73743	0.750106	0.0408683	0.535479
240139_at	---	---	5.42395	4.92974	5.05767	0.750407	0.00504683	0.379703
232471_at	---	---	5.91826	5.28176	5.6375	0.750454	0.00786597	0.389823
207173_x_at	CDH11	cadherin 11, type 2, OB-cadherin (osteoblast)	4.69158	4.00053	4.4438	0.750533	0.0712457	0.593008
233019_at	CNOT7	CCR4-NOT transcription complex, subunit 7	3.8645	3.39998	3.4812	0.750667	0.014354	0.432086
206197_at	NME5	non-metastatic cells 5, protein expressed in (nucleoside-diphosphate kinase)	4.78363	4.29175	4.41741	0.750881	0.0508313	0.555278
218821_at	NPEPL1	aminopeptidase-like 1	6.34638	5.79685	6.015	0.750961	0.00168191	0.32523
221541_at	CRISPLD2	cysteine-rich secretory protein LCCL domain containing 2	5.75073	5.31553	5.35078	0.750973	0.0223928	0.471035
1556373_a_at	---	---	5.76704	5.29526	5.38912	0.751	0.0621734	0.576633
240824_at	---	---	3.40104	2.743	3.13508	0.751065	0.0099141	0.403411
239978_at	---	---	5.47615	4.71889	5.26981	0.751094	0.0387604	0.525654
1554456_a_at	LINS1	lines homolog 1 (Drosophila)	4.43464	4.09408	3.9787	0.751231	0.00745341	0.389823
242374_at	---	---	4.29074	3.56779	4.06429	0.751246	0.0852909	0.611779
238029_s_at	SLC16A14	solute carrier family 16, member 14 (monocarboxylic acid transporter 14)	4.57003	4.47664	3.96598	0.751295	0.232921	0.748002
1557718_at	PPP2R5C	protein phosphatase 2, regulatory subunit B', gamma	5.21349	4.6702	4.87986	0.75145	0.00636199	0.389823
1570210_x_at	SAPS2	SAPS domain family, member 2	5.99761	5.38824	5.70402	0.751573	0.010114	0.403411
202430_s_at	PLSCR1	phospholipid scramblase 1	7.82962	7.57169	7.32547	0.751678	0.218601	0.738839	Feld, Hepatology 2007; Honda, Gastroenterology 2010
242828_at	FIGN	fidgetin	6.08273	5.81245	5.58648	0.751835	0.00647786	0.389823
206143_at	SLC26A3	solute carrier family 26, member 3	2.89325	2.56879	2.42957	0.751853	0.0985184	0.627083
244881_at	LMLN	leishmanolysin-like (metallopeptidase M8 family)	5.72303	5.32057	5.30643	0.751945	0.00706712	0.389823
232587_at	EML4	echinoderm microtubule associated protein like 4	5.51006	5.06158	5.12132	0.752029	0.00214388	0.333109
202380_s_at	NKTR	natural killer-tumor recognition sequence	7.38617	6.76787	7.09939	0.75205	0.0140588	0.429547
239721_at	---	---	5.52498	5.0807	5.13399	0.752114	0.00563206	0.384042
214964_at	---	---	5.70214	4.99061	5.47167	0.752171	0.0423941	0.53856
236130_at	SNORA37	small nucleolar RNA, H/ACA box 37	4.39202	3.99105	3.97558	0.752293	0.0144383	0.432764
1559910_at	---	---	6.8416	6.10137	6.62903	0.752393	0.162841	0.699855
1569538_at	---	---	3.56588	3.01192	3.24162	0.752416	0.00302611	0.34665
243612_at	NSD1	nuclear receptor binding SET domain protein 1	3.83644	3.29951	3.5021	0.75246	0.00505657	0.379703
235107_at	---	---	5.74405	5.28067	5.36564	0.752478	0.00304132	0.34665
214016_s_at	SFPQ	splicing factor proline/glutamine-rich	7.95681	7.29207	7.6996	0.752607	0.00689846	0.389823
201417_at	SOX4	SRY (sex determining region Y)-box 4	5.90118	5.28178	5.61752	0.75285	0.103926	0.637208
224185_at	---	---	5.2808	4.67323	4.99013	0.752882	0.0949801	0.622692
242225_at	---	---	6.059	5.42597	5.78374	0.752927	0.12912	0.662711
230753_at	PATL2	protein associated with topoisomerase II homolog 2 (yeast)	5.77839	5.20758	5.46599	0.752988	0.0358397	0.517316
235942_at	NCRNA00230A /// NCRNA00230B	non-protein coding RNA 230A /// non-protein coding RNA 230B	3.78275	3.17085	3.49522	0.753055	0.10235	0.634653
233417_at	---	---	5.2877	4.78612	4.93414	0.753112	0.0247091	0.477296
229459_at	FAM19A5	family with sequence similarity 19 (chemokine (C-C motif)-like), member A5	3.52773	3.51279	2.88252	0.753219	0.197516	0.722117
221103_s_at	WDR52	WD repeat domain 52	3.84464	3.33805	3.49473	0.753321	0.00553384	0.384042
232333_at	---	---	5.57201	5.05842	5.22636	0.75334	0.00920223	0.397444
244648_at	---	---	5.36347	4.87754	5.00162	0.75347	0.00763043	0.389823
1560271_at	---	---	4.17086	3.76771	3.75979	0.753616	0.0104918	0.403411
240960_at	---	---	5.01714	4.48881	4.68119	0.753621	0.00960878	0.401911
218298_s_at	C14orf159	chromosome 14 open reading frame 159	8.01693	7.60777	7.60969	0.75369	0.00369321	0.359494
214290_s_at	HIST2H2AA3 /// HIST2H2AA4	histone cluster 2, H2aa3 /// histone cluster 2, H2aa4	10.1363	9.73892	9.7222	0.753748	0.0916166	0.618874
229466_at	TRIM66	tripartite motif-containing 66	6.51796	5.92933	6.21891	0.753855	0.00820115	0.390817
228001_at	TMEM50B	transmembrane protein 50B	7.04402	6.5769	6.67219	0.753894	0.000698272	0.291948
217456_x_at	HLA-E	major histocompatibility complex, class I, E	10.8153	10.297	10.4752	0.754228	0.088837	0.615447
243280_at	---	---	6.2373	5.79857	5.8497	0.754308	0.014936	0.43732
231876_at	TRIM56	tripartite motif-containing 56	7.45877	6.82903	7.1863	0.754479	0.138965	0.672421
205875_s_at	TREX1	three prime repair exonuclease 1	7.42504	7.06236	6.99249	0.754532	0.0197832	0.459501
212203_x_at	IFITM3	interferon induced transmembrane protein 3 (1-8U)	12.4162	11.9798	12.0282	0.754661	0.0671718	0.585756	Feld, Hepatology 2007
236607_at	---	---	5.2699	4.74369	4.93588	0.754669	0.0123454	0.415577
210390_s_at	CCL14-CCL15 /// CCL15	CCL14-CCL15 read-through transcript /// chemokine (C-C motif) ligand 15	8.88882	8.54002	8.44872	0.754783	0.189476	0.716736
205673_s_at	ASB9	ankyrin repeat and SOCS box-containing 9	6.21745	5.99327	5.70263	0.754802	0.145792	0.67986
210514_x_at	HLA-G	major histocompatibility complex, class I, G	9.94006	9.43591	9.59327	0.75482	0.0791444	0.604798
221432_s_at	SLC25A28	solute carrier family 25, member 28	7.33282	7.02156	6.87046	0.754873	0.0313293	0.503878
204858_s_at	TYMP	thymidine phosphorylase	7.88093	7.41886	7.50922	0.754927	0.189079	0.716673
226663_at	ANKRD10	ankyrin repeat domain 10	6.35812	5.80613	6.04042	0.754946	0.0551264	0.565941
217591_at	---	---	4.84678	4.39501	4.46902	0.754969	0.0330881	0.509928
1560512_at	---	---	4.45389	3.9751	4.09314	0.755227	0.00836297	0.390817
211796_s_at	TRBC1	T cell receptor beta constant 1	7.44617	6.87171	7.14305	0.755302	0.366884	0.826678
1558953_s_at	CEP164	centrosomal protein 164kDa	6.23464	5.62619	5.95193	0.755307	0.0199156	0.460314
243514_at	---	---	4.8567	4.15146	4.6325	0.755451	0.0695201	0.590347
221860_at	HNRNPL	heterogeneous nuclear ribonucleoprotein L	6.50807	5.86585	6.24605	0.755452	0.0170749	0.450499
225107_at	HNRNPA2B1	heterogeneous nuclear ribonucleoprotein A2/B1	7.95907	7.37026	7.66538	0.755573	0.00308502	0.34665
225189_s_at	RAPH1	Ras association (RalGDS/AF-6) and pleckstrin homology domains 1	8.93713	8.19019	8.73838	0.755593	0.141462	0.674828
243851_at	RAB3GAP2	RAB3 GTPase activating protein subunit 2 (non-catalytic)	2.92493	2.55037	2.50311	0.755707	0.000812888	0.291948
231897_at	PTGR1	prostaglandin reductase 1	11.3625	11.3053	10.7508	0.755845	0.0373843	0.521767
239585_at	KAT2B	K(lysine) acetyltransferase 2B	3.44257	3.05712	3.02781	0.755884	0.00847066	0.391622
227778_at	HEATR7A	HEAT repeat containing 7A	7.29983	6.83638	6.93205	0.755938	0.00937919	0.397444
233689_at	---	---	5.39366	4.99624	4.98645	0.755999	0.00178393	0.32523
233037_at	---	---	4.61736	4.06213	4.30486	0.75601	0.0377667	0.522991
219028_at	HIPK2	homeodomain interacting protein kinase 2	5.5109	4.88441	5.24129	0.75605	0.0958515	0.624045
244292_at	---	---	5.56697	4.81389	5.37397	0.756267	0.0277043	0.488487
1569040_s_at	FLJ40330	hypothetical LOC645784	3.16239	2.62789	2.83861	0.756388	0.0990185	0.628122
235927_at	XPO1	exportin 1 (CRM1 homolog, yeast)	6.13091	5.52538	5.84989	0.756436	0.0145281	0.433674
225242_s_at	CCDC80	coiled-coil domain containing 80	4.4774	3.99266	4.12423	0.756542	0.0359018	0.517316
236019_at	RAB12	RAB12, member RAS oncogene family	5.74638	5.13143	5.47144	0.756576	0.0124492	0.415577
1556601_a_at	SPATA13	Spermatogenesis associated 13	5.57045	4.92914	5.31155	0.75665	0.0353874	0.51556
240690_at	---	---	5.06382	4.50128	4.75797	0.75675	0.0133607	0.422003
200897_s_at	PALLD	palladin, cytoskeletal associated protein	7.58108	7.05599	7.25317	0.756888	0.171184	0.706219
200905_x_at	HLA-E	major histocompatibility complex, class I, E	11.2977	10.792	10.9591	0.757205	0.134891	0.668987
201324_at	EMP1	epithelial membrane protein 1	4.59011	4.27348	4.13822	0.757245	0.0694058	0.590217
223206_s_at	NMRAL1	NmrA-like family domain containing 1	7.72508	7.23295	7.37906	0.757434	0.0594555	0.573021
244562_s_at	---	---	7.08272	6.62812	6.71486	0.757654	0.0520812	0.556586
222895_s_at	BCL11B	B-cell CLL/lymphoma 11B (zinc finger protein)	5.23117	4.60689	4.96517	0.757669	0.162652	0.699693
238449_at	LOC595101	PI-3-kinase-related kinase SMG-1 pseudogene	5.60625	4.98035	5.34126	0.757685	0.0445848	0.541079
223623_at	C2orf40	chromosome 2 open reading frame 40	5.58229	5.26961	5.13004	0.757901	0.191528	0.718117
241865_at	---	---	5.47485	4.92342	5.1663	0.758052	0.00403959	0.363348
232058_at	---	---	5.68351	5.08402	5.4038	0.758056	0.00438133	0.369611
235984_at	---	---	4.92932	4.58097	4.49904	0.75809	0.00263735	0.345799
213212_x_at	GOLGA6L5 /// GOLGA6L9	golgin A6 family-like 5 (pseudogene) /// golgin A6 family-like 9	7.1251	6.6512	6.77051	0.758208	0.00237412	0.333109
209392_at	ENPP2	ectonucleotide pyrophosphatase/phosphodiesterase 2	8.73542	9.00131	7.93708	0.758252	0.434291	0.850254
203424_s_at	IGFBP5	insulin-like growth factor binding protein 5	5.71953	5.30215	5.33134	0.75831	0.131039	0.66507
232530_at	PLD1	phospholipase D1, phosphatidylcholine-specific	3.7052	3.19615	3.3722	0.758376	0.016742	0.44828
238069_at	---	---	4.36265	3.70302	4.1203	0.758471	0.0591689	0.572736
214035_x_at	LOC399491	GPS, PLAT and transmembrane domain-containing protein	8.69269	8.08612	8.4187	0.758538	0.00657621	0.389823
214870_x_at	LOC100288442 /// LOC339047 /// NPIP	hypothetical LOC100288442 /// hypothetical protein LOC339047 /// nuclear pore complex interacting protein	8.84016	8.18714	8.59408	0.75855	0.0187925	0.455807
210519_s_at	NQO1	NAD(P)H dehydrogenase, quinone 1	4.81735	4.45365	4.39777	0.75858	0.0665144	0.583898
212036_s_at	PNN	pinin, desmosome associated protein	8.58325	7.92271	8.34183	0.758601	0.0568799	0.569394
240926_at	LRCH3	leucine-rich repeats and calponin homology (CH) domain containing 3	5.6222	5.1284	5.28093	0.758665	0.214588	0.73441
234635_at	KRTAP4-1	keratin associated protein 4-1	5.72079	5.23915	5.37296	0.758907	0.123816	0.657482
238070_at	---	---	5.32287	4.77727	5.01355	0.75895	0.00535781	0.384042
233044_at	---	---	5.75241	5.2531	5.4154	0.758975	0.173965	0.707532
215304_at	---	---	5.75312	5.18771	5.45597	0.759043	0.0322707	0.509013
233180_at	---	---	5.8911	5.30494	5.60653	0.759088	0.0728856	0.596315
213888_s_at	TRAF3IP3	TRAF3 interacting protein 3	5.70512	5.24495	5.34513	0.759142	0.195123	0.720736
214092_x_at	SFRS14	splicing factor, arginine/serine-rich 14	6.6349	6.16354	6.28219	0.759331	0.000651186	0.291948
239022_at	---	---	5.22191	4.80449	4.83716	0.759436	0.0188198	0.455807
233765_at	---	---	4.87248	4.59249	4.40545	0.759495	0.022117	0.471035
220011_at	C1orf135	chromosome 1 open reading frame 135	4.91579	4.34598	4.62273	0.75952	0.0414395	0.536455
210324_at	C8G	complement component 8, gamma polypeptide	10.213	9.895	9.76949	0.759744	0.00836042	0.390817
208228_s_at	FGFR2	fibroblast growth factor receptor 2	7.50793	6.99096	7.18471	0.760025	0.0488291	0.550318
239331_at	---	---	5.52625	4.65892	5.41326	0.760033	0.144314	0.677843
1555929_s_at	---	---	4.39962	3.94648	4.0383	0.76009	0.0919643	0.619124
204379_s_at	FGFR3	fibroblast growth factor receptor 3	8.91533	8.14232	8.74606	0.760134	0.0929488	0.620651
238536_at	---	---	5.3667	4.77065	5.09141	0.760184	0.0939592	0.622303
215848_at	SCAPER	S-phase cyclin A-associated protein in the ER	5.66895	5.24095	5.29285	0.760196	0.0121956	0.415577
218066_at	SLC12A7	solute carrier family 12 (potassium/chloride transporters), member 7	9.28328	8.6361	9.03879	0.760225	0.0143118	0.431198
210070_s_at	CHKB-CPT1B /// CPT1B	choline kinase-like, carnitine palmitoyltransferase 1B (muscle) transcription unit /// carnitine palmitoyltransferase 1B (muscle)	5.33788	5.06252	4.87046	0.760283	0.182507	0.713874
243537_at	---	---	4.82424	4.21949	4.55474	0.760378	0.00928724	0.397444
208789_at	PTRF	polymerase I and transcript release factor	7.12281	6.70605	6.74126	0.760619	0.00298378	0.34665
229831_at	CNTN3	contactin 3 (plasmacytoma associated)	6.67426	6.38599	6.21581	0.760685	0.195736	0.720764
214064_at	TF	transferrin	10.2025	9.39756	10.0548	0.760904	0.112749	0.646998
219489_s_at	NXN	nucleoredoxin	5.61194	5.45069	5.07815	0.760971	0.149885	0.684741
232262_at	PIGL	phosphatidylinositol glycan anchor biosynthesis, class L	4.86056	4.38187	4.51732	0.760997	0.0124259	0.415577
213596_at	CASP4	caspase 4, apoptosis-related cysteine peptidase	5.64627	5.15988	5.30791	0.761088	0.0178943	0.453205
204457_s_at	GAS1	growth arrest-specific 1	5.86665	5.49124	5.46181	0.761118	0.0674432	0.586626
211649_x_at	IGH@ /// IGHA1 /// IGHG1 /// IGHM	immunoglobulin heavy locus /// immunoglobulin heavy constant alpha 1 /// immunoglobulin heavy constant gamma 1 (G1m marker) /// immunoglobulin heavy constant mu	6.01728	5.4385	5.73472	0.761207	0.137968	0.670624
222310_at	SFRS15	splicing factor, arginine/serine-rich 15	4.63206	4.12211	4.30879	0.761399	0.00340125	0.353213
201037_at	PFKP	phosphofructokinase, platelet	5.8049	5.36696	5.43882	0.761529	0.0099386	0.403411
216560_x_at	IGL@	Immunoglobulin lambda locus	6.64723	5.85543	6.49348	0.761534	0.473818	0.868369
219229_at	SLCO3A1	solute carrier organic anion transporter family, member 3A1	5.76211	5.24612	5.4429	0.761542	0.0121178	0.415577
239516_at	---	---	6.64452	6.22755	6.26641	0.761712	0.0820075	0.608785
203083_at	THBS2	thrombospondin 2	6.10339	5.58012	5.78934	0.761806	0.0438851	0.539573
226579_at	---	---	6.54843	6.05678	6.21562	0.761875	0.00185622	0.32523
230142_s_at	CIRBP	cold inducible RNA binding protein	6.47975	5.86885	6.21891	0.762011	0.019692	0.458933
236006_s_at	AKAP10	A kinase (PRKA) anchor protein 10	3.96892	3.44186	3.65779	0.762021	0.00837061	0.390817
220106_at	NPC1L1	NPC1 (Niemann-Pick disease, type C1, gene)-like 1	7.37026	7.1538	6.87299	0.762089	0.154919	0.691116
223165_s_at	IP6K2	inositol hexakisphosphate kinase 2	8.1507	7.82952	7.71702	0.762342	0.0275221	0.488487
232369_at	---	---	7.33016	6.73802	7.06018	0.76271	0.0342146	0.511296
1566145_s_at	LOC644450	hypothetical protein LOC644450	8.24592	7.77251	7.90505	0.76283	0.124669	0.657789
239804_at	---	---	4.37574	3.92662	4.02035	0.762845	0.00627829	0.3893
1557521_a_at	---	---	7.03842	6.46886	6.7556	0.762949	0.0963872	0.624425
214924_s_at	TRAK1	trafficking protein, kinesin binding 1	7.08706	6.5261	6.79912	0.762962	0.0194831	0.458933
211651_s_at	LAMB1	laminin, beta 1	5.91506	5.34905	5.63021	0.762982	0.201005	0.723414
216910_at	XPNPEP2	X-prolyl aminopeptidase (aminopeptidase P) 2, membrane-bound	7.58255	7.01466	7.29892	0.763006	0.241551	0.753697
210186_s_at	FKBP1A	FK506 binding protein 1A, 12kDa	6.67398	6.24858	6.30487	0.763015	0.128519	0.66218
236974_at	---	---	5.05081	4.39054	4.82305	0.763152	0.015568	0.441588
236094_at	TCF7L2	Transcription factor 7-like 2 (T-cell specific, HMG-box)	5.38618	5.0604	4.95812	0.763283	0.000876785	0.291948
209099_x_at	JAG1	jagged 1 (Alagille syndrome)	7.58642	6.99636	7.31696	0.763295	0.0682772	0.588391
201222_s_at	RAD23B	RAD23 homolog B (S. cerevisiae)	9.58989	9.25065	9.16997	0.763306	0.158045	0.694686
231848_x_at	ZNF207	zinc finger protein 207	7.57085	7.17387	7.18568	0.763346	0.0120928	0.415577
225016_at	APCDD1	adenomatosis polyposis coli down-regulated 1	4.2312	3.78488	3.8757	0.763367	0.088795	0.615436
212232_at	FNBP4	formin binding protein 4	7.96075	7.42633	7.65826	0.763415	0.0018943	0.328532
203281_s_at	UBA7	ubiquitin-like modifier activating enzyme 7	7.39145	6.86799	7.08251	0.763457	0.0422283	0.538472
219437_s_at	ANKRD11	ankyrin repeat domain 11	7.07494	6.39952	6.85749	0.763562	0.0878935	0.615436
225355_at	NEURL1B	neuralized homolog 1B (Drosophila)	7.61316	7.04684	7.33042	0.763614	0.0256828	0.483009
232406_at	---	---	5.35004	4.91077	4.99116	0.763644	0.00270628	0.345799
215412_x_at	PMS2L2	postmeiotic segregation increased 2-like 2 pseudogene	6.57451	6.11181	6.22974	0.763664	0.00797586	0.390406
240170_at	---	---	4.36609	3.8063	4.07998	0.763794	0.00902111	0.396163
226651_at	HOMER1	homer homolog 1 (Drosophila)	5.95149	5.41888	5.6494	0.763904	0.0183296	0.454121
230707_at	SORL1	sortilin-related receptor, L(DLR class) A repeats-containing	6.58732	6.14382	6.23181	0.763917	0.130877	0.66507
1568763_s_at	LOC728613 /// PDCD6	programmed cell death 6 pseudogene /// programmed cell death 6	8.74654	8.33098	8.37432	0.763935	0.0221681	0.471035
244387_at	---	---	4.90563	4.42723	4.57153	0.764077	0.132394	0.665678
201315_x_at	IFITM2	interferon induced transmembrane protein 2 (1-8D)	11.5532	11.1229	11.1906	0.764224	0.0490182	0.550318
235757_at	---	---	4.59008	4.24785	4.17476	0.764236	0.0848458	0.611779
238049_at	GRAMD3	GRAM domain containing 3	5.00738	4.66989	4.5894	0.764294	0.0586197	0.572065
233364_s_at	---	---	5.07771	4.59516	4.747	0.764375	0.0196459	0.458933
201104_x_at	LOC200030 /// NBPF10 /// NBPF11 /// NBPF14 /// NBPF15 /// NBPF16 /// NBPF8	neuroblastoma breakpoint family, member 11-like /// neuroblastoma breakpoint family, member 10 /// neuroblastoma breakpoint family, member 11 /// neuroblastoma breakpoint family, member 14 /// neuroblastoma breakpoint family, member 15 /// neuroblastoma breakpoint family, member 16 /// neuroblastoma breakpoint family, member 8	9.80872	9.29858	9.49463	0.764395	0.0127464	0.416741
1559410_at	---	---	6.39817	5.76855	6.15591	0.764441	0.177292	0.710378
224375_at	---	---	7.10142	6.56418	6.8038	0.764463	0.156388	0.692711
243791_at	---	---	3.3892	2.9358	3.04134	0.764483	0.000999763	0.291948
232683_s_at	PARP6	poly (ADP-ribose) polymerase family, member 6	6.73138	6.38209	6.32158	0.764663	0.0963375	0.624425
230064_at	---	---	4.17832	3.78527	3.79523	0.764815	0.00558863	0.384042
1556568_a_at	---	---	3.24484	2.75568	2.91949	0.764838	0.0216116	0.467402
214743_at	CUX1	cut-like homeobox 1	6.06151	5.47484	5.79512	0.764987	0.097555	0.626034
238688_at	TPM1	Tropomyosin 1 (alpha)	6.43824	5.83587	6.18164	0.765109	0.00839082	0.390817
232584_at	---	---	6.04116	5.38943	5.81462	0.765259	0.10944	0.64343
233449_at	---	---	5.85382	5.26009	5.59254	0.765274	0.0843538	0.611222
239432_at	FLJ31306	hypothetical LOC379025	5.89002	5.0813	5.75801	0.765367	0.153613	0.688849
229694_at	WDR11	WD repeat domain 11	6.12675	5.57826	5.83878	0.765424	0.0239821	0.473486
209008_x_at	KRT8	keratin 8	9.33897	8.76461	9.06655	0.765437	0.0461927	0.546206
1561631_at	---	---	6.38145	5.93456	6.033	0.765585	0.00151949	0.32523
223940_x_at	MALAT1	metastasis associated lung adenocarcinoma transcript 1 (non-protein coding)	8.41618	7.49426	8.35303	0.765678	0.19516	0.720736
1565889_at	---	---	3.83763	3.27952	3.55626	0.765702	0.00547958	0.384042
236436_at	SLC25A45	solute carrier family 25, member 45	6.14736	5.80966	5.7338	0.765717	0.00181107	0.32523
213451_x_at	TNXA /// TNXB	tenascin XA pseudogene /// tenascin XB	6.96667	6.50584	6.62732	0.765828	0.0148466	0.436156
223797_at	PRO2852	hypothetical protein PRO2852	4.5985	3.94037	4.37768	0.765879	0.0118001	0.414126
201163_s_at	IGFBP7	insulin-like growth factor binding protein 7	10.9319	10.6766	10.4695	0.765904	0.07606	0.600214
1560297_at	---	---	5.08088	4.63441	4.73317	0.765916	0.019742	0.459274
242343_x_at	---	---	6.63376	5.97703	6.41241	0.765985	0.0626501	0.576633
232978_at	---	---	4.45118	4.04871	4.07742	0.766029	0.0805904	0.607464
240759_at	---	---	3.51084	3.09443	3.14556	0.766071	0.00056537	0.291948
239944_at	---	---	4.55872	4.23062	4.14055	0.7661	0.0121103	0.415577
232681_at	---	---	4.99247	4.52056	4.66062	0.76611	0.00773103	0.389823
202864_s_at	SP100	SP100 nuclear antigen	8.09169	7.74706	7.68382	0.766229	0.0755423	0.600214
1557578_at	PHLDB2	Pleckstrin homology-like domain, family B, member 2	4.0718	3.61204	3.73306	0.766244	0.0123414	0.415577
232012_at	CAPN1	calpain 1, (mu/I) large subunit	6.44261	5.86999	6.17163	0.766258	0.0147273	0.435271
236134_at	DCAF7	DDB1 and CUL4 associated factor 7	4.76661	4.3578	4.39748	0.766305	0.00281245	0.34665
224817_at	SH3PXD2A	SH3 and PX domains 2A	7.77156	7.23219	7.48083	0.766324	0.135056	0.668987
230245_s_at	LOC283663	hypothetical LOC283663	4.8492	4.21148	4.61783	0.766441	0.0269545	0.486538
1557675_at	RAF1	V-raf-1 murine leukemia viral oncogene homolog 1	6.78012	6.20225	6.5129	0.766463	0.0109285	0.404478
242449_at	---	---	4.92121	4.17576	4.75457	0.766471	0.0844234	0.611304
217728_at	S100A6	S100 calcium binding protein A6	7.85176	7.44649	7.48113	0.766512	0.0916275	0.618874
237426_at	SP100	SP100 nuclear antigen	5.49404	4.84851	5.26782	0.766593	0.0362899	0.517785
233105_at	---	---	4.05494	3.66765	3.67391	0.766642	0.00485104	0.374434
242827_x_at	---	---	5.20542	4.61533	4.94647	0.766771	0.0462149	0.546206
226802_s_at	LOC96610	BMS1 homolog, ribosome assembly protein (yeast) pseudogene	7.20572	6.56852	6.97508	0.766791	0.170148	0.705757
239886_at	---	---	5.83619	5.25343	5.57296	0.766813	0.0685075	0.588559
231890_at	---	---	4.35934	3.87913	4.03463	0.766829	0.0262328	0.48447
222986_s_at	SHISA5	shisa homolog 5 (Xenopus laevis)	8.92719	8.61025	8.50462	0.766865	0.0807937	0.607883
223192_at	SLC25A28	solute carrier family 25, member 28	7.79887	7.40605	7.42202	0.766927	0.0179199	0.453205
234082_at	---	---	5.40803	4.76261	5.18278	0.76694	0.0179988	0.453205
242695_at	---	---	4.90974	4.29519	4.66605	0.766969	0.0588525	0.572736
205381_at	LRRC17	leucine rich repeat containing 17	4.92886	4.54666	4.54599	0.767044	0.000873881	0.291948
226322_at	TMTC1	transmembrane and tetratricopeptide repeat containing 1	4.91405	4.31971	4.65858	0.767081	0.230102	0.746345
240554_at	AKAP8L	A kinase (PRKA) anchor protein 8-like	5.11197	4.70927	4.74176	0.767164	0.000354534	0.291948
224577_at	ERGIC1	endoplasmic reticulum-golgi intermediate compartment (ERGIC) 1	8.09284	7.8326	7.63721	0.767184	0.0835773	0.609498
233265_at	---	---	4.64824	4.22633	4.28969	0.767206	0.00597287	0.386009
215378_at	---	---	3.52283	2.98303	3.23513	0.767247	0.00555305	0.384042
242268_at	CELF2	CUGBP, Elav-like family member 2	3.87426	3.25919	3.63184	0.767287	0.0822955	0.608785
234997_x_at	---	---	5.39885	4.86818	5.10593	0.76733	0.0167246	0.448166
226207_at	RILPL1	Rab interacting lysosomal protein-like 1	6.61482	6.21197	6.24553	0.767437	0.00562556	0.384042
222128_at	NSUN6	NOP2/Sun domain family, member 6	7.01899	6.36252	6.80197	0.767469	0.176489	0.709131
239265_at	TMEM20	transmembrane protein 20	4.65499	4.58726	4.0849	0.767532	0.149137	0.684057
221501_x_at	LOC339047	hypothetical protein LOC339047	9.74277	9.07535	9.53254	0.767546	0.0330084	0.509928
242918_at	NASP	Nuclear autoantigenic sperm protein (histone-binding)	5.65623	4.77879	5.57229	0.76764	0.180573	0.712072
204994_at	MX2	myxovirus (influenza virus) resistance 2 (mouse)	7.12308	6.60182	6.82612	0.767865	0.15501	0.691116
204655_at	CCL5	chemokine (C-C motif) ligand 5	7.68824	7.1796	7.38401	0.767969	0.253658	0.761258
224284_x_at	FKSG49	FKSG49	8.44573	7.84735	8.19565	0.768069	0.0708206	0.591459
1556743_at	---	---	2.98565	2.59091	2.61349	0.768106	0.00230492	0.333109
207265_s_at	KDELR3	KDEL (Lys-Asp-Glu-Leu) endoplasmic reticulum protein retention receptor 3	6.5772	6.2524	6.16309	0.768108	0.0295319	0.497263
221748_s_at	TNS1	tensin 1	8.5475	7.95298	8.29577	0.76829	0.0937875	0.622303
242759_at	---	---	3.77468	3.2024	3.50972	0.76833	0.0111233	0.408919
222369_at	NAA40	N(alpha)-acetyltransferase 40, NatD catalytic subunit, homolog (S. cerevisiae)	5.91944	5.40659	5.61951	0.768556	0.00505821	0.379703
210686_x_at	SLC25A16	solute carrier family 25 (mitochondrial carrier; Graves disease autoantigen), member 16	9.91313	9.26564	9.69424	0.768645	0.0700258	0.591077
242829_x_at	FBXL3	F-box and leucine-rich repeat protein 3	6.685	6.10794	6.42407	0.768711	0.0632671	0.578512
241798_at	---	---	5.51034	5.00892	5.20413	0.768748	0.00923019	0.397444
1557384_at	ZNF131	Zinc finger protein 131	4.79057	4.41584	4.40857	0.768825	0.00741356	0.389823
229272_at	FNBP4	formin binding protein 4	4.55851	3.92536	4.33179	0.768901	0.0438437	0.539573
1559020_a_at	---	---	4.50524	4.25548	4.04896	0.769058	0.0255018	0.483009
204158_s_at	TCIRG1	T-cell, immune regulator 1, ATPase, H+ transporting, lysosomal V0 subunit A3	7.35515	6.86973	7.04052	0.769143	0.030259	0.500674
227654_at	FAM65C	family with sequence similarity 65, member C	6.7062	6.22438	6.38956	0.769196	0.0230159	0.472089
238363_at	---	---	5.18765	4.75446	4.84187	0.769204	0.0957756	0.623912
233300_at	---	---	5.95651	5.16525	5.82571	0.769251	0.304243	0.790896
219357_at	GTPBP1	GTP binding protein 1	6.38459	5.93739	6.04739	0.769262	0.0626462	0.576633
1560002_at	FAM27D1	family with sequence similarity 27, member D1	5.37001	4.76862	5.12562	0.769366	0.231855	0.74766
201395_at	RBM5	RNA binding motif protein 5	9.1106	8.55437	8.83936	0.769442	0.00506774	0.379703
233167_at	SELO	selenoprotein O	8.08053	7.37837	7.89693	0.769472	0.0565174	0.569106
238999_at	---	---	4.23744	3.78957	3.90152	0.769558	0.0180987	0.453205
243158_at	---	---	4.03231	3.72158	3.61447	0.769677	0.0349025	0.512662
203851_at	IGFBP6	insulin-like growth factor binding protein 6	5.92214	5.51489	5.56235	0.769724	0.0263267	0.484894
214802_at	EXOC7	exocyst complex component 7	6.13693	5.60642	5.85127	0.769784	0.00963184	0.401911
201596_x_at	KRT18	keratin 18	10.6635	10.1571	10.3636	0.769841	0.036544	0.517785
240991_at	---	---	5.49007	4.9769	5.19445	0.769929	0.0401282	0.533056
232465_at	---	---	5.82251	5.36253	5.49518	0.769999	0.00604901	0.386009
236725_at	WWC1	WW and C2 domain containing 1	5.90095	5.38082	5.61001	0.770101	0.0228541	0.472089
239644_at	---	---	5.33422	4.90137	4.99118	0.770185	0.0129875	0.41814
210230_at	---	---	6.83442	6.29176	6.55743	0.770242	0.167819	0.703786
237210_at	NFRKB	nuclear factor related to kappaB binding protein	5.08542	4.6894	4.72055	0.770278	0.0662486	0.583463
235743_at	---	---	4.07997	3.53174	3.8065	0.770302	0.0862342	0.611779
221933_at	NLGN4X	neuroligin 4, X-linked	4.71073	4.35535	4.32162	0.770326	0.00466696	0.374434
242878_at	---	---	6.79482	6.34143	6.46479	0.770417	0.0317203	0.505778
223395_at	ABI3BP	ABI family, member 3 (NESH) binding protein	6.68616	6.05003	6.46577	0.770417	0.110734	0.644227
228723_at	---	---	6.18973	5.54037	5.97752	0.770498	0.0325203	0.509875
217527_s_at	NFATC2IP	nuclear factor of activated T-cells, cytoplasmic, calcineurin-dependent 2 interacting protein	7.09499	6.53912	6.82691	0.770567	0.0220247	0.470868
238651_at	---	---	5.35299	4.85911	5.04801	0.77067	0.00205044	0.333109
203894_at	TUBG2	tubulin, gamma 2	5.21778	4.9052	4.80406	0.770681	0.00160333	0.32523
208120_x_at	FKSG49	FKSG49	9.77562	9.2015	9.51902	0.77075	0.054263	0.562997
1564077_at	---	---	3.35539	2.92447	3.01325	0.770872	0.0144682	0.432855
1556762_a_at	---	---	4.68398	4.1807	4.38537	0.770914	0.00576254	0.384042
213051_at	ZC3HAV1	zinc finger CCCH-type, antiviral 1	8.33355	7.71772	8.10255	0.770936	0.0830936	0.60883
223644_s_at	CRYGS	crystallin, gamma S	5.4918	5.15838	5.09148	0.77098	0.00537201	0.384042
234074_at	---	---	5.82409	5.37055	5.49603	0.771042	0.0408459	0.535479
223378_at	GLIS2	GLIS family zinc finger 2	6.46374	6.17722	6.03555	0.771069	0.077777	0.60229
1558447_at	LOC100128439	hypothetical protein LOC100128439	3.84611	3.2764	3.58788	0.771087	0.0206545	0.463112
202421_at	IGSF3	immunoglobulin superfamily, member 3	5.40186	4.85518	5.13001	0.771152	0.0336347	0.510513
237449_at	SP8	Sp8 transcription factor	3.46467	3.0174	3.13341	0.77123	0.0064089	0.389823
204538_x_at	NPIP	nuclear pore complex interacting protein	9.43361	8.78474	9.22365	0.771345	0.0216426	0.467409
221008_s_at	AGXT2L1	alanine-glyoxylate aminotransferase 2-like 1	10.914	10.8363	10.3616	0.771423	0.179175	0.711758
215946_x_at	IGLL3	immunoglobulin lambda-like polypeptide 3	8.26919	7.33945	8.22838	0.771554	0.379201	0.831981
204205_at	APOBEC3G	apolipoprotein B mRNA editing enzyme, catalytic polypeptide-like 3G	7.54165	7.28715	7.09576	0.771576	0.322993	0.803139
217523_at	CD44	CD44 molecule (Indian blood group)	3.80728	3.36723	3.4728	0.771603	0.0250977	0.479043
202102_s_at	BRD4	bromodomain containing 4	8.3564	7.58231	8.22245	0.771641	0.180404	0.712072
211538_s_at	HSPA2	heat shock 70kDa protein 2	5.33852	5.01539	4.93425	0.771725	0.0280254	0.489297
235048_at	FAM169A	family with sequence similarity 169, member A	6.46974	6.21843	6.02263	0.771807	0.0887311	0.615436
225839_at	RBM33	RNA binding motif protein 33	6.83783	6.26355	6.5846	0.771841	0.0165416	0.448166
210839_s_at	ENPP2	ectonucleotide pyrophosphatase/phosphodiesterase 2	7.45131	7.6484	6.73533	0.771866	0.421527	0.846573
1552482_at	RAPH1	Ras association (RalGDS/AF-6) and pleckstrin homology domains 1	5.88119	5.1431	5.72669	0.771989	0.277827	0.776406
203698_s_at	FRZB	frizzled-related protein	5.35693	5.03037	4.95596	0.77214	0.052062	0.556567
208161_s_at	ABCC3	ATP-binding cassette, sub-family C (CFTR/MRP), member 3	8.85458	8.47821	8.48354	0.772152	0.0161753	0.447099
238593_at	C11orf80	chromosome 11 open reading frame 80	3.07134	2.47719	2.83133	0.772276	0.0306361	0.501769
235650_at	CDHR3	cadherin-related family member 3	4.89187	4.51325	4.5227	0.77233	0.000761808	0.291948
205206_at	KAL1	Kallmann syndrome 1 sequence	4.60047	4.00615	4.36096	0.772409	0.101905	0.633262
1557522_x_at	---	---	7.33934	6.72292	7.11318	0.772442	0.0680861	0.587688
244778_x_at	---	---	4.66183	4.1372	4.38082	0.772514	0.00406728	0.363348
1552393_at	ENTHD1	ENTH domain containing 1	3.06693	2.69552	2.69405	0.772535	0.00860333	0.394023
226334_s_at	AHSA2	AHA1, activator of heat shock 90kDa protein ATPase homolog 2 (yeast)	7.27773	6.75071	6.99862	0.77267	0.0405284	0.535479
243338_at	---	---	5.21037	4.89676	4.80328	0.772693	0.00113591	0.301518
229949_at	---	---	8.3117	7.57996	8.15554	0.772709	0.123948	0.65753
243150_at	---	---	5.43819	5.05947	5.07026	0.77272	0.0864366	0.611779
235056_at	ETV6	ets variant 6	5.31337	5.06375	4.86799	0.772723	0.321752	0.801957
208719_s_at	DDX17	DEAD (Asp-Glu-Ala-Asp) box polypeptide 17	4.29645	4.16759	3.77866	0.772739	0.133536	0.66653
228592_at	MS4A1	membrane-spanning 4-domains, subfamily A, member 1	5.49994	4.5145	5.49643	0.772854	0.635493	0.919926
235423_at	ORC2L	origin recognition complex, subunit 2-like (yeast)	6.20975	5.658	5.94613	0.772888	0.0255867	0.483009
236203_at	HLA-DQA1	major histocompatibility complex, class II, DQ alpha 1	4.0289	3.27813	3.88497	0.77298	0.551311	0.89684
238751_at	---	---	7.92477	7.3419	7.68039	0.773078	0.22048	0.740088
224578_at	RCC2	regulator of chromosome condensation 2	7.58882	7.00562	7.34467	0.773087	0.0276478	0.488487
239185_at	ABCA9	ATP-binding cassette, sub-family A (ABC1), member 9	4.39608	4.15729	3.94546	0.773147	0.112807	0.646998
229871_at	SAMD4B	sterile alpha motif domain containing 4B	6.41563	5.83363	6.17152	0.773347	0.017855	0.453205
232376_at	PCCA	Propionyl Coenzyme A carboxylase, alpha polypeptide	3.42045	3.04438	3.05293	0.773392	0.00154492	0.32523
225191_at	CIRBP	cold inducible RNA binding protein	7.62105	6.98502	7.41002	0.773564	0.0342625	0.511296
1558695_at	---	---	7.1211	6.54884	6.87186	0.773583	0.0402816	0.533849
1557504_at	---	---	2.89641	2.45167	2.57078	0.773626	0.00105112	0.293685
222816_s_at	ZCCHC2	zinc finger, CCHC domain containing 2	6.85056	6.39675	6.53134	0.773946	0.160076	0.697186
1557051_s_at	---	---	4.49885	4.081	4.15856	0.774116	0.00311649	0.34665
1556060_a_at	ZNF451	zinc finger protein 451	6.68596	6.18661	6.39481	0.774198	0.0144284	0.432764
213380_x_at	MST1P9	macrophage stimulating 1 (hepatocyte growth factor-like) pseudogene 9	10.6305	10.1091	10.3529	0.774276	0.0100654	0.403411
242425_at	---	---	4.88212	4.3968	4.58292	0.774321	0.00692357	0.389823
214911_s_at	BRD2	bromodomain containing 2	7.80728	7.24281	7.5556	0.774333	0.0842541	0.610923
230337_at	SOS1	son of sevenless homolog 1 (Drosophila)	6.22163	5.5113	6.05794	0.77449	0.120189	0.653697
1558467_a_at	UGGT2	UDP-glucose glycoprotein glucosyltransferase 2	4.19978	3.59014	3.97585	0.77455	0.0214078	0.466466
240665_at	---	---	3.69016	3.19145	3.39971	0.77456	0.0194968	0.458933
239449_at	---	---	4.60716	4.09828	4.32329	0.774723	0.0412516	0.535921
211868_x_at	IGH@ /// IGHA1 /// IGHA2 /// IGHD /// IGHG1 /// IGHG2 /// IGHG3 /// IGHM /// IGHV4-31 /// LOC100126583 /// LOC100290320 /// LOC100291190	immunoglobulin heavy locus /// immunoglobulin heavy constant alpha 1 /// immunoglobulin heavy constant alpha 2 (A2m marker) /// immunoglobulin heavy constant delta /// immunoglobulin heavy constant gamma 1 (G1m marker) /// immunoglobulin heavy constant gamma 2 (G2m marker) /// immunoglobulin heavy constant gamma 3 (G3m marker) /// immunoglobulin heavy constant mu /// immunoglobulin heavy variable…	6.49658	5.98827	6.2128	0.774869	0.204967	0.726712
242499_at	U2AF1	U2 small nuclear RNA auxiliary factor 1	5.60525	5.03935	5.35617	0.774915	0.0789319	0.604798
216365_x_at	IGLV3-19	immunoglobulin lambda variable 3-19	6.25826	5.79034	5.95044	0.774928	0.121406	0.655307
218429_s_at	C19orf66	chromosome 19 open reading frame 66	8.82947	8.5497	8.40881	0.774947	0.0378563	0.523337
211654_x_at	HLA-DQB1	major histocompatibility complex, class II, DQ beta 1	8.69481	8.36876	8.30225	0.775062	0.437622	0.85244
230760_at	ZFY	zinc finger protein, Y-linked	3.72379	2.82296	3.6762	0.775095	0.389915	0.836279
232618_at	CYorf15A	chromosome Y open reading frame 15A	3.71397	2.98646	3.56277	0.775223	0.284671	0.78147
212915_at	PDZRN3	PDZ domain containing ring finger 3	3.68686	3.28942	3.33798	0.775343	0.0510533	0.555278
218224_at	PNMA1	paraneoplastic antigen MA1	6.39873	5.7894	6.177	0.775349	0.0450057	0.542961
241459_at	---	---	4.21057	3.86662	3.82962	0.775354	0.011303	0.410416
206265_s_at	GPLD1	glycosylphosphatidylinositol specific phospholipase D1	6.92286	6.43859	6.62613	0.775362	0.061454	0.576633
1560031_at	FRMD4A	FERM domain containing 4A	5.50044	4.93386	5.25311	0.775368	0.0222393	0.471035
1557586_s_at	ATP6V1H	ATPase, H+ transporting, lysosomal 50/57kDa, V1 subunit H	4.11405	3.65603	3.8017	0.775405	0.00616926	0.386602
1559993_at	SFXN3	Sideroflexin 3	4.6399	4.20134	4.31627	0.775539	0.0222484	0.471035
1556229_at	---	---	5.91893	5.366	5.66394	0.775546	0.0334476	0.509939
221816_s_at	PHF11	PHD finger protein 11	8.67838	8.29773	8.32011	0.775571	0.0367374	0.519094
232922_s_at	SLC17A9	solute carrier family 17, member 9	5.99954	5.63585	5.63121	0.775615	0.00238073	0.333109
200906_s_at	PALLD	palladin, cytoskeletal associated protein	6.56686	6.03008	6.30245	0.775634	0.130966	0.66507
236965_at	UBQLNL	ubiquilin-like	5.14454	4.75054	4.79447	0.77564	0.0123677	0.415577
215114_at	SENP3	SUMO1/sentrin/SMT3 specific peptidase 3	4.05137	3.6119	3.72864	0.775658	0.00493631	0.376459
205935_at	FOXF1	forkhead box F1	5.66701	5.4127	5.2332	0.775663	0.0278594	0.488878
201969_at	NASP	nuclear autoantigenic sperm protein (histone-binding)	6.87337	6.38128	6.58335	0.776042	0.0344373	0.511337
1558996_at	FOXP1	forkhead box P1	4.284	3.74415	4.02267	0.776051	0.0541094	0.562516
1557036_at	ZBTB1	Zinc finger and BTB domain containing 1	3.67979	3.25554	3.34911	0.776055	0.0104893	0.403411
243417_at	ZADH2	zinc binding alcohol dehydrogenase domain containing 2	4.6818	4.25591	4.3529	0.776323	0.0680699	0.587688
244271_at	---	---	5.37639	4.84387	5.11193	0.776478	0.0300157	0.498929
239283_at	TMED5	transmembrane emp24 protein transport domain containing 5	4.85904	4.50596	4.48716	0.776558	0.023357	0.472089
1564209_at	LOC282980	hypothetical protein LOC282980	4.45229	4.07603	4.09438	0.77658	0.127816	0.661103
230682_x_at	ABCC3	ATP-binding cassette, sub-family C (CFTR/MRP), member 3	7.44636	6.92212	7.17726	0.776588	0.0332713	0.509928
1556211_a_at	---	---	6.1092	5.83895	5.68773	0.776597	0.0388843	0.525654
1568658_at	C2orf74	chromosome 2 open reading frame 74	6.36547	6.1346	5.92098	0.776802	0.217522	0.737392
1555553_a_at	SLC22A7	solute carrier family 22 (organic anion transporter), member 7	8.17062	7.80193	7.80885	0.776813	0.037061	0.520439
214983_at	TTTY15	testis-specific transcript, Y-linked 15 (non-protein coding)	4.29571	3.68125	4.08184	0.776957	0.0867083	0.612501
239071_at	RBBP4	Retinoblastoma binding protein 4	6.30451	5.81086	6.01848	0.777068	0.0279661	0.489297
227591_at	---	---	5.47997	5.06867	5.14463	0.777103	0.00426801	0.366494
212566_at	MAP4	microtubule-associated protein 4	7.44739	6.97986	7.14593	0.777152	0.131147	0.665108
220074_at	CDHR5	cadherin-related family member 5	6.79345	6.38233	6.45827	0.777189	0.0915678	0.618874
232916_at	---	---	4.98001	4.60809	4.62136	0.77721	0.0652378	0.580194
217526_at	NFATC2IP	nuclear factor of activated T-cells, cytoplasmic, calcineurin-dependent 2 interacting protein	7.14547	6.6403	6.86678	0.777213	0.0589168	0.572736
230256_at	C1orf104	Chromosome 1 open reading frame 104	6.59274	5.87719	6.44052	0.777296	0.193613	0.718786
208685_x_at	BRD2	bromodomain containing 2	8.25177	7.70328	7.99939	0.777318	0.0668459	0.584694
205074_at	SLC22A5	solute carrier family 22 (organic cation/carnitine transporter), member 5	5.91692	5.5331	5.56595	0.777387	0.00227789	0.333109
1553574_at	IFNE	interferon, epsilon	3.93973	3.64397	3.53599	0.777412	0.106043	0.639244
232601_at	---	---	6.20708	5.65961	5.95445	0.777443	0.0153971	0.439944
1556732_at	EML4	Echinoderm microtubule associated protein like 4	4.32839	3.86334	4.02648	0.777495	0.00678657	0.389823
227182_at	SUSD3	sushi domain containing 3	6.43082	6.48329	5.8188	0.777633	0.232469	0.747886
232696_at	LOC648556	uncharacterized gastric protein ZA43P	3.90031	3.41022	3.61419	0.777754	0.0459908	0.546185
1557067_s_at	LUC7L	LUC7-like (S. cerevisiae)	5.46714	4.97424	5.18281	0.777792	0.0156676	0.442115
223143_s_at	AKIRIN2	akirin 2	3.69944	3.60141	3.17855	0.777909	0.214735	0.734485
1558711_at	FAM13AOS	FAM13A opposite strand (non-protein coding)	5.60193	5.08325	5.33346	0.777928	0.0046431	0.374434
217152_at	---	---	5.79682	5.23624	5.55363	0.777971	0.0220846	0.471035
236472_at	---	---	5.62464	5.13258	5.34049	0.77802	0.0351547	0.514607
219378_at	NAA16	N(alpha)-acetyltransferase 16, NatA auxiliary subunit	6.61583	6.18898	6.29273	0.77808	0.000742288	0.291948
242814_at	SERPINB9	serpin peptidase inhibitor, clade B (ovalbumin), member 9	5.73426	5.2024	5.47429	0.778122	0.0125232	0.415967
239923_at	---	---	6.99988	6.40766	6.77613	0.778126	0.0771166	0.601318
227227_at	---	---	6.44102	5.76054	6.2703	0.778149	0.0757946	0.600214
1552622_s_at	LOC441259 /// POLR2J2	PMS2 postmeiotic segregation increased 2 (S. cerevisiae)-like /// polymerase (RNA) II (DNA directed) polypeptide J2	6.00656	5.25156	5.88055	0.778152	0.144936	0.678686
64408_s_at	CALML4	calmodulin-like 4	7.20072	6.97729	6.75625	0.77831	0.262116	0.767617
214163_at	HSPB11	heat shock protein family B (small), member 11	4.51182	3.92869	4.28341	0.778392	0.039287	0.528112
203674_at	HELZ	helicase with zinc finger	7.01843	6.40578	6.80777	0.778406	0.0432566	0.539378
224576_at	ERGIC1	endoplasmic reticulum-golgi intermediate compartment (ERGIC) 1	9.77352	9.43424	9.39903	0.77847	0.113589	0.647435
213905_x_at	BGN	biglycan	8.25612	7.70244	8.01067	0.778604	0.119269	0.652833
240038_at	---	---	6.90286	6.234	6.72688	0.778724	0.213048	0.733408
1569203_at	CXCL2	chemokine (C-X-C motif) ligand 2	5.57702	5.23795	5.20339	0.7788	0.123355	0.657482
209826_at	EGFL8 /// PPT2	EGF-like-domain, multiple 8 /// palmitoyl-protein thioesterase 2	5.03208	4.47766	4.78772	0.778821	0.0269576	0.486538
1554168_a_at	SH3KBP1	SH3-domain kinase binding protein 1	7.31664	6.84081	7.02524	0.77886	0.0697372	0.590347
226419_s_at	FLJ44342	hypothetical LOC645460	6.59525	6.09062	6.32136	0.778943	0.0229803	0.472089
221662_s_at	SLC22A7	solute carrier family 22 (organic anion transporter), member 7	9.00779	8.67427	8.63156	0.779052	0.0410827	0.535738
242055_at	PSMG4	Proteasome (prosome, macropain) assembly chaperone 4	4.97963	4.54825	4.66218	0.779069	0.0439725	0.539573
242057_at	---	---	5.88517	5.45853	5.56507	0.779138	0.150835	0.68558
201786_s_at	ADAR	adenosine deaminase, RNA-specific	10.0782	9.61758	9.77878	0.779229	0.149646	0.684462
201505_at	LAMB1	laminin, beta 1	5.70733	5.19587	5.43847	0.779255	0.27471	0.774559
215191_at	---	---	3.65746	3.12067	3.40384	0.779268	0.0507435	0.555278
208977_x_at	TUBB2C	tubulin, beta 2C	9.27914	8.97495	8.88666	0.7795	0.0182327	0.453611
238327_at	ODF3B	outer dense fiber of sperm tails 3B	7.44473	7.17416	7.03213	0.77952	0.256086	0.763597
1556923_at	---	---	5.59429	4.98645	5.38424	0.779587	0.146742	0.681162
202963_at	RFX5	regulatory factor X, 5 (influences HLA class II expression)	6.98832	6.55788	6.67194	0.779625	0.11422	0.64772
219794_at	VPS53	vacuolar protein sorting 53 homolog (S. cerevisiae)	4.45019	3.84819	4.23713	0.779752	0.0483502	0.550318
223679_at	CTNNB1	catenin (cadherin-associated protein), beta 1, 88kDa	5.38083	4.99581	5.03762	0.779764	0.00468983	0.374434
236685_at	---	---	5.69525	5.20955	5.41272	0.779859	0.0487808	0.550318
1554670_at	GGA1	golgi-associated, gamma adaptin ear containing, ARF binding protein 1	3.83528	3.17664	3.65667	0.779907	0.0412419	0.535921
220143_x_at	LUC7L	LUC7-like (S. cerevisiae)	6.88655	6.35977	6.62911	0.780006	0.0101759	0.403411
39313_at	WNK1	WNK lysine deficient protein kinase 1	4.26779	3.58679	4.103	0.780045	0.0611179	0.57636
242427_at	WAC	WW domain containing adaptor with coiled-coil	3.30129	2.79135	3.03386	0.780046	0.0299671	0.498712
224549_x_at	---	---	8.2609	7.94058	7.87983	0.780091	0.157529	0.694467
204981_at	SLC22A18	solute carrier family 22, member 18	8.57823	8.35247	8.14042	0.780092	0.139298	0.672561
233210_at	FLJ12120	hypothetical LOC388439	4.13134	3.76864	3.77581	0.780126	0.0870017	0.613375
228455_at	RBM15	RNA binding motif protein 15	5.52186	4.93778	5.29916	0.78013	0.0972547	0.625221
236921_at	---	---	4.5378	4.1232	4.21349	0.780153	0.0166705	0.448166
231776_at	EOMES	eomesodermin homolog (Xenopus laevis)	6.51155	6.12508	6.17054	0.780217	0.189076	0.716673
233614_at	---	---	3.67694	3.31736	3.32025	0.780369	0.0749807	0.598779
218180_s_at	EPS8L2	EPS8-like 2	8.13118	7.62287	7.86374	0.78037	0.0490188	0.550318
236883_at	---	---	5.98543	5.54397	5.67787	0.780371	0.0505784	0.554569
232614_at	---	---	3.91042	3.35463	3.67174	0.780463	0.0307332	0.501769
230270_at	PRPF38B	PRP38 pre-mRNA processing factor 38 (yeast) domain containing B	5.46925	4.90619	5.23495	0.780469	0.0348743	0.512662
1567214_a_at	PNN	pinin, desmosome associated protein	7.50583	7.00324	7.23541	0.780522	0.0385972	0.525383
225188_at	RAPH1	Ras association (RalGDS/AF-6) and pleckstrin homology domains 1	10.0021	9.30406	9.84927	0.780652	0.164426	0.701407
208403_x_at	MAX	MYC associated factor X	6.36667	6.10952	5.94952	0.780705	0.00658005	0.389823
1560800_at	---	---	2.87527	2.37052	2.60702	0.780821	0.0791882	0.604798
228877_at	RGL3	ral guanine nucleotide dissociation stimulator-like 3	5.78025	5.31082	5.49155	0.781068	0.0215275	0.467402
204352_at	TRAF5	TNF receptor-associated factor 5	5.13016	4.46953	4.95619	0.781073	0.212992	0.733408
228844_at	SLC13A5	solute carrier family 13 (sodium-dependent citrate transporter), member 5	9.42032	8.93707	9.14006	0.781122	0.0831635	0.60895
232096_x_at	---	---	5.75796	5.3638	5.42455	0.781224	0.0151415	0.439335
208476_s_at	FRMD4A	FERM domain containing 4A	5.70717	5.15662	5.46762	0.781234	0.0589649	0.572736
225740_x_at	MDM4	Mdm4 p53 binding protein homolog (mouse)	7.67506	7.00956	7.50449	0.781234	0.0256874	0.483009
222026_at	RBM3	RNA binding motif (RNP1, RRM) protein 3	4.55227	4.21174	4.18675	0.78125	0.00543387	0.384042
242413_at	---	---	4.50863	4.06299	4.20661	0.781395	0.0130466	0.418544
227926_s_at	LOC200030 /// NBPF11	neuroblastoma breakpoint family, member 11-like /// neuroblastoma breakpoint family, member 11	6.61127	6.54099	6.08404	0.781398	0.0666939	0.584335
1598_g_at	GAS6	growth arrest-specific 6	8.29734	7.89129	7.97162	0.781413	0.0100226	0.403411
238342_at	---	---	5.20337	4.52447	5.04149	0.781454	0.0807258	0.607763
1559631_at	---	---	5.16164	4.75823	4.83449	0.781466	0.0323086	0.509013
1556543_at	---	---	3.7747	3.23947	3.52672	0.781494	0.0339063	0.511296
218552_at	ECHDC2	enoyl CoA hydratase domain containing 2	11.2168	10.788	10.9049	0.781501	0.0210637	0.464097
219519_s_at	SIGLEC1	sialic acid binding Ig-like lectin 1, sialoadhesin	7.06691	6.64678	6.74998	0.781528	0.112771	0.646998
207943_x_at	PLAGL1	pleiomorphic adenoma gene-like 1	5.35492	4.77315	5.13499	0.781536	0.0747133	0.597983
214705_at	INADL	InaD-like (Drosophila)	3.55721	3.16963	3.22081	0.781552	0.017745	0.453205
204309_at	CYP11A1	cytochrome P450, family 11, subfamily A, polypeptide 1	5.55729	5.52583	5.00744	0.781623	0.174467	0.708098
218337_at	FAM160B2	family with sequence similarity 160, member B2	6.65562	6.18854	6.36717	0.781633	0.0173971	0.451528
235983_at	---	---	5.01056	4.40204	4.80733	0.781752	0.0447468	0.541942
210587_at	INHBE	inhibin, beta E	9.19803	9.0103	8.74235	0.781763	0.227983	0.74464
219822_at	MTRF1	mitochondrial translational release factor 1	6.06041	5.72328	5.69438	0.781764	0.0190475	0.457278
1557551_at	---	---	4.7858	4.29207	4.51381	0.781792	0.0433405	0.539378
1556049_at	RTN4	reticulon 4	5.83066	5.52386	5.44667	0.781846	0.0779105	0.602466
213358_at	KIAA0802	KIAA0802	4.81805	4.44162	4.47647	0.782057	0.0358063	0.517316
1553186_x_at	RASEF	RAS and EF-hand domain containing	9.59801	8.99355	9.3937	0.782215	0.19441	0.719554
1562484_at	C17orf104	chromosome 17 open reading frame 104	3.87688	3.43173	3.57705	0.782236	0.025788	0.483321
235410_at	NPHP3	nephronophthisis 3 (adolescent)	6.22891	5.83787	5.89666	0.782252	0.054816	0.56496
240111_at	RHOBTB3	Rho-related BTB domain containing 3	5.03183	4.49111	4.78951	0.782292	0.00886449	0.396163
242650_at	---	---	3.44249	3.04055	3.11695	0.782307	0.0619266	0.576633
1557432_at	RASAL2	RAS protein activator like 2	3.59801	3.32703	3.19391	0.782315	0.0419028	0.538051
235705_at	---	---	5.73118	5.26798	5.4426	0.782378	0.0440143	0.539573
216525_x_at	PMS2L3	postmeiotic segregation increased 2-like 3	7.59276	7.21153	7.25501	0.782383	0.00205789	0.333109
239321_at	---	---	5.83128	5.26402	5.60523	0.782413	0.194543	0.719891
226363_at	ABCC5	ATP-binding cassette, sub-family C (CFTR/MRP), member 5	5.77322	5.20121	5.55045	0.782555	0.0428753	0.53906
1569930_at	---	---	4.77131	4.34215	4.46288	0.782573	0.00486717	0.374531
209723_at	SERPINB9	serpin peptidase inhibitor, clade B (ovalbumin), member 9	7.36367	6.83599	7.11498	0.782784	0.113416	0.647362
240108_at	---	---	4.87993	4.32477	4.64782	0.782817	0.064137	0.57971
1562544_at	---	---	4.78917	4.42922	4.44018	0.7829	0.0333121	0.509928
242361_at	IMMT	Inner membrane protein, mitochondrial (mitofilin)	4.51977	4.1481	4.17789	0.78293	0.0127834	0.417143
209293_x_at	ID4	inhibitor of DNA binding 4, dominant negative helix-loop-helix protein	6.34552	5.8864	6.0562	0.782955	0.00749722	0.389823
232002_at	---	---	5.79608	5.26736	5.54869	0.783017	0.0438789	0.539573
222311_s_at	SFRS15	splicing factor, arginine/serine-rich 15	5.75669	5.26055	5.48979	0.783028	0.00334135	0.352281
1559128_at	HSDL2	hydroxysteroid dehydrogenase like 2	5.41459	4.9727	5.11515	0.783032	0.178428	0.711421
1555892_s_at	LOC253039	hypothetical LOC253039	4.28783	4.01613	3.88647	0.783096	0.0704216	0.591341
1552280_at	TIMD4	T-cell immunoglobulin and mucin domain containing 4	7.04422	6.58423	6.7559	0.783121	0.34754	0.817153
40149_at	SH2B1	SH2B adaptor protein 1	6.45482	5.9645	6.18481	0.783155	0.00142398	0.319598
201552_at	LAMP1	lysosomal-associated membrane protein 1	10.7299	10.2765	10.4378	0.783201	0.112601	0.646777
239179_at	---	---	4.9305	4.38804	4.69205	0.783251	0.0116202	0.412327
215611_at	TCF12	transcription factor 12	4.35961	3.92538	4.0564	0.783308	0.0287162	0.494266
236368_at	KIAA0368	KIAA0368	6.09221	5.57474	5.83938	0.783457	0.0362279	0.517785
1556606_at	NAV2	neuron navigator 2	4.02867	3.64029	3.69844	0.783477	0.0898517	0.616548
215463_at	OR7E24	olfactory receptor, family 7, subfamily E, member 24	4.91905	4.50757	4.60274	0.783499	0.0526193	0.559537
244312_at	---	---	3.86815	3.40677	3.58187	0.783528	0.0213248	0.465251
222453_at	CYBRD1	cytochrome b reductase 1	7.41185	7.12716	7.01973	0.783586	0.0663884	0.58373
238806_at	---	---	6.23623	5.8349	5.91411	0.783591	0.0339746	0.511296
1560395_at	---	---	2.64325	2.25905	2.3111	0.78368	0.0156965	0.442115
226665_at	AHSA2	AHA1, activator of heat shock 90kDa protein ATPase homolog 2 (yeast)	6.34527	5.82982	6.09203	0.783734	0.0651793	0.580194
223492_s_at	LRRFIP1	leucine rich repeat (in FLII) interacting protein 1	5.53107	5.09276	5.23169	0.783782	0.0176113	0.453205
224873_s_at	MRPS25	mitochondrial ribosomal protein S25	5.74511	5.39832	5.39085	0.783793	0.0489749	0.550318
1563845_at	FAM153B	family with sequence similarity 153, member B	3.78532	3.37212	3.47137	0.783948	0.00899144	0.396163
233720_at	SORBS2	Sorbin and SH3 domain containing 2	6.271	5.75786	6.01709	0.783973	0.190261	0.717729
230748_at	SLC16A6	solute carrier family 16, member 6 (monocarboxylic acid transporter 7)	4.82711	4.45408	4.48915	0.783976	0.0634826	0.578512
226969_at	MTR	5-methyltetrahydrofolate-homocysteine methyltransferase	5.93437	5.2732	5.76966	0.784102	0.10967	0.643542
213505_s_at	SFRS14	splicing factor, arginine/serine-rich 14	6.9436	6.4517	6.67735	0.784111	0.00269147	0.345799
232175_at	ARF1	ADP-ribosylation factor 1	6.25224	5.7401	5.99828	0.784162	0.0114296	0.410766
235409_at	MGA	MAX gene associated	5.35224	4.91063	5.05609	0.784206	0.0397694	0.530396
213612_x_at	NBPF10 /// NBPF15 /// NBPF16 /// NBPF8 /// NBPF9	neuroblastoma breakpoint family, member 10 /// neuroblastoma breakpoint family, member 15 /// neuroblastoma breakpoint family, member 16 /// neuroblastoma breakpoint family, member 8 /// neuroblastoma breakpoint family, member 9	10.7295	10.2414	10.4614	0.784249	0.0202089	0.460314
207060_at	EN2	engrailed homeobox 2	3.61422	3.10614	3.35813	0.784265	0.0461937	0.546206
230424_at	C5orf13	chromosome 5 open reading frame 13	5.69104	4.95939	5.56925	0.784318	0.3109	0.795367
230405_at	C5orf56	chromosome 5 open reading frame 56	7.4222	7.05786	7.08017	0.78437	0.0408427	0.535479
32099_at	SAFB2	scaffold attachment factor B2	7.64524	7.09431	7.4152	0.784377	0.0211455	0.464097
214805_at	EIF4A1	Eukaryotic translation initiation factor 4A1	5.68456	5.29008	5.36075	0.784412	0.0150009	0.43732
204706_at	INPP5E	inositol polyphosphate-5-phosphatase, 72 kDa	6.10708	5.63018	5.83274	0.78442	0.0294482	0.497099
234753_x_at	---	---	5.7067	5.30479	5.38746	0.784452	0.0723772	0.595429
239096_at	---	---	5.22193	4.6795	4.98706	0.78447	0.0156689	0.442115
231982_at	C19orf77	chromosome 19 open reading frame 77	7.82209	8.1438	7.06876	0.78448	0.650208	0.92584
1569940_at	SLC6A16	Solute carrier family 6, member 16	6.73637	6.20541	6.49465	0.784482	0.098589	0.627083
220221_at	VPS13D	vacuolar protein sorting 13 homolog D (S. cerevisiae)	4.47029	4.04399	4.16581	0.784494	0.032054	0.508902
224061_at	INMT	indolethylamine N-methyltransferase	7.18024	6.86415	6.80965	0.784498	0.158011	0.694686
233555_s_at	SULF2	sulfatase 2	6.90627	6.72875	6.45265	0.78454	0.227188	0.74375
204557_s_at	DZIP1	DAZ interacting protein 1	3.51679	2.85204	3.3557	0.784607	0.166903	0.703636
232931_at	SNRNP200	small nuclear ribonucleoprotein 200kDa (U5)	5.65471	5.18481	5.37678	0.784631	0.00974905	0.401911
210306_at	L3MBTL	l(3)mbt-like (Drosophila)	4.18923	3.74926	3.89341	0.784652	0.00781141	0.389823
1556339_a_at	---	---	4.0163	3.62159	3.69348	0.784705	0.0162852	0.44754
205890_s_at	GABBR1 /// UBD	gamma-aminobutyric acid (GABA) B receptor, 1 /// ubiquitin D	10.3435	9.9135	10.042	0.784736	0.593206	0.908757
215920_s_at	LOC100288442 /// LOC100289169 /// LOC729602 /// NPIPL2 /// NPIPL3 /// PDXDC2	hypothetical LOC100288442 /// hypothetical protein LOC100289169 /// NPIP-like protein ENSP00000283050 /// nuclear pore complex interacting protein-like 2 /// nuclear pore complex interacting protein-like 3 /// pyridoxal-dependent decarboxylase domain containing 2	5.80983	5.36647	5.5164	0.78477	0.0519853	0.556567
201103_x_at	LOC200030 /// NBPF10 /// NBPF11 /// NBPF15 /// NBPF16 /// NBPF8 /// NBPF9	neuroblastoma breakpoint family, member 11-like /// neuroblastoma breakpoint family, member 10 /// neuroblastoma breakpoint family, member 11 /// neuroblastoma breakpoint family, member 15 /// neuroblastoma breakpoint family, member 16 /// neuroblastoma breakpoint family, member 8 /// neuroblastoma breakpoint family, member 9	10.7351	10.2432	10.4709	0.784782	0.0234571	0.472089
244560_at	---	---	3.57989	3.24259	3.22307	0.784854	0.0188482	0.455807
1560199_x_at	LOC728153	similar to FAM133B protein	5.76735	5.55661	5.33469	0.784887	0.00939926	0.397444
221766_s_at	FAM46A	family with sequence similarity 46, member A	8.06491	7.67921	7.73725	0.784894	0.0862203	0.611779
1558651_at	---	---	4.57249	4.0432	4.33113	0.784945	0.187139	0.716673
241154_x_at	---	---	6.6129	6.16652	6.3218	0.78495	0.122667	0.656707
211149_at	UTY	ubiquitously transcribed tetratricopeptide repeat gene, Y-linked	3.64253	3.06721	3.42882	0.784959	0.132132	0.665678
1553062_at	MOGAT1	monoacylglycerol O-acyltransferase 1	6.66532	6.14572	6.41831	0.785002	0.182738	0.713993
1560128_x_at	C5orf56	Chromosome 5 open reading frame 56	5.69785	5.027	5.54161	0.785009	0.0417424	0.537614
1555372_at	BCL2L11	BCL2-like 11 (apoptosis facilitator)	5.62691	5.13323	5.36468	0.785116	0.0568877	0.569394
210109_at	C7orf54	chromosome 7 open reading frame 54	5.04201	4.61696	4.73864	0.78513	0.0275309	0.488487
217227_x_at	IGLV1-44 /// LOC100290557	immunoglobulin lambda variable 1-44 /// similar to hCG91935	6.84793	6.11098	6.73178	0.785157	0.256761	0.764379
223643_at	CRYGS	Crystallin, gamma S	3.54755	3.13057	3.23946	0.785169	0.00746637	0.389823
244464_at	---	---	4.16135	3.88104	3.7718	0.785355	0.00927486	0.397444
1557081_at	RBM25	RNA binding motif protein 25	7.13829	6.51838	6.9526	0.78539	0.0423275	0.538472
221768_at	SFPQ	Splicing factor proline/glutamine-rich (polypyrimidine tract binding protein associated)	7.14857	6.54898	6.95073	0.785403	0.0404083	0.535112
320_at	PEX6	peroxisomal biogenesis factor 6	5.36079	5.20753	4.8956	0.785553	0.048023	0.550318
217933_s_at	LAP3	leucine aminopeptidase 3	10.4722	10.2317	10.0594	0.785569	0.149772	0.684657	Chen, Gastroenterology 2005; Feld, Hepatology 2007
210461_s_at	ABLIM1	actin binding LIM protein 1	6.24371	5.80402	5.95044	0.785576	0.0228476	0.472089
228821_at	ST6GAL2	ST6 beta-galactosamide alpha-2,6-sialyltranferase 2	4.03055	3.71192	3.66467	0.785585	0.0780334	0.60285
211417_x_at	GGT1	gamma-glutamyltransferase 1	7.23103	6.89221	6.87739	0.785628	0.0765784	0.600913
1558356_at	UACA	uveal autoantigen with coiled-coil domains and ankyrin repeats	3.40222	2.98791	3.09425	0.785757	0.00635359	0.389823
201261_x_at	BGN	biglycan	8.22539	7.75229	7.95274	0.785774	0.0775653	0.602044
238788_at	LOC494150	prohibitin pseudogene	4.04283	3.72856	3.67522	0.785884	0.0107978	0.404478
239862_at	---	---	4.39352	3.97534	4.08835	0.785917	0.0563121	0.569006
221869_at	ZNF512B	zinc finger protein 512B	6.24655	5.57035	6.09637	0.785979	0.27048	0.772324
203938_s_at	TAF1C	TATA box binding protein (TBP)-associated factor, RNA polymerase I, C, 110kDa	6.27567	5.78504	6.01448	0.786089	0.00520519	0.384042
210594_x_at	MPZL1	myelin protein zero-like 1	6.30849	6.06924	5.89666	0.786156	0.0235525	0.472089
204799_at	ZBED4	zinc finger, BED-type containing 4	4.34	3.97148	4.00602	0.786254	0.0126932	0.41645
201578_at	PODXL	podocalyxin-like	5.99551	5.61537	5.66854	0.786267	0.13876	0.672328
234604_at	---	---	5.41334	5.07479	5.06181	0.786403	0.100212	0.629298
242542_at	---	---	4.01269	3.62796	3.6892	0.786518	0.0332923	0.509928
233834_at	---	---	3.87282	3.51543	3.5331	0.786571	0.0465265	0.546206
208966_x_at	IFI16	interferon, gamma-inducible protein 16	7.80616	7.49638	7.43808	0.786645	0.288688	0.783784
243495_s_at	---	---	4.23726	3.73137	3.98692	0.786668	0.0177467	0.453205
242114_at	LOC440354	PI-3-kinase-related kinase SMG-1 pseudogene	6.01192	5.44423	5.79893	0.786758	0.112152	0.645626
208890_s_at	PLXNB2	plexin B2	8.67785	8.05502	8.4981	0.786814	0.137236	0.670478
1557080_s_at	ITGBL1	integrin, beta-like 1 (with EGF-like repeat domains)	5.87021	5.54134	5.51437	0.786911	0.161291	0.698544
237782_at	---	---	4.77158	4.26967	4.51962	0.786929	0.0611502	0.576383
1555843_at	HNRNPM	Heterogeneous nuclear ribonucleoprotein M	5.95434	5.40039	5.73385	0.787016	0.0471678	0.547768
212875_s_at	C2CD2	C2 calcium-dependent domain containing 2	7.10158	6.56142	6.87289	0.78704	0.04416	0.54039
1552621_at	POLR2J2	polymerase (RNA) II (DNA directed) polypeptide J2	7.28546	6.39421	7.2676	0.787099	0.294169	0.786012
1556589_at	---	---	6.53755	6.06422	6.26905	0.787135	0.133983	0.667494
242859_at	---	---	5.35673	4.79126	5.14354	0.787148	0.015555	0.441588
215201_at	REPS1	RALBP1 associated Eps domain containing 1	4.89055	4.39594	4.63489	0.787163	0.196743	0.721168
224705_s_at	TNRC6A	trinucleotide repeat containing 6A	8.02679	7.54334	7.76472	0.787258	0.0372714	0.521261
204211_x_at	EIF2AK2	eukaryotic translation initiation factor 2-alpha kinase 2	8.50494	8.20314	8.13391	0.787272	0.136553	0.670478
212190_at	SERPINE2	serpin peptidase inhibitor, clade E (nexin, plasminogen activator inhibitor type 1), member 2	7.13615	6.66252	6.86834	0.787313	0.050718	0.555278
217771_at	GOLM1	golgi membrane protein 1	6.17555	5.85211	5.81774	0.787351	0.415084	0.8438
237703_at	---	---	5.23736	4.72399	4.99376	0.78744	0.0120004	0.415577
225855_at	EPB41L5	erythrocyte membrane protein band 4.1 like 5	7.74566	7.27866	7.47427	0.787449	0.0564349	0.569006
223295_s_at	LUC7L	LUC7-like (S. cerevisiae)	7.14107	6.74802	6.82534	0.787455	0.0047347	0.374434
211386_at	MGC12488	hypothetical protein MGC12488	3.58846	3.24361	3.24385	0.787474	0.0139685	0.428941
203568_s_at	TRIM38	tripartite motif-containing 38	7.57203	7.05511	7.33088	0.787544	0.0160824	0.446779
220574_at	SEMA6D	sema domain, transmembrane domain (TM), and cytoplasmic domain, (semaphorin) 6D	4.92671	4.49975	4.63228	0.787783	0.128902	0.66218
53720_at	C19orf66	chromosome 19 open reading frame 66	8.97242	8.75565	8.55192	0.787798	0.0732187	0.596322
239576_at	MTUS1	Microtubule associated tumor suppressor 1	5.74798	5.13888	5.56304	0.78785	0.0862418	0.611779
230959_at	---	---	4.9315	4.40862	4.69487	0.787866	0.0748589	0.5984
219290_x_at	DAPP1	dual adaptor of phosphotyrosine and 3-phosphoinositides	4.79251	4.49059	4.4234	0.787903	0.0283969	0.492741
209684_at	RIN2	Ras and Rab interactor 2	7.16933	6.8883	6.78777	0.787926	0.0509904	0.555278
1553920_at	C9orf84	chromosome 9 open reading frame 84	4.43641	4.03652	4.12633	0.787985	0.166672	0.703392
214712_at	RUNDC2C	RUN domain containing 2C	3.37315	2.92294	3.09356	0.788089	0.0501773	0.552451
201229_s_at	ARIH2	ariadne homolog 2 (Drosophila)	6.787	6.44794	6.44107	0.788205	0.0713828	0.593008
224361_s_at	IL17RB	interleukin 17 receptor B	8.96386	8.48598	8.7017	0.788372	0.204772	0.726712
203882_at	IRF9	interferon regulatory factor 9	9.45254	9.05425	9.14284	0.788443	0.111232	0.644488
200973_s_at	TSPAN3	tetraspanin 3	7.4771	7.17999	7.10705	0.788566	0.0223502	0.471035
219199_at	AFF4	AF4/FMR2 family, member 4	4.74398	4.289	4.46914	0.788734	0.0565115	0.569106
220445_s_at	CSAG2 /// CSAG3	CSAG family, member 2 /// CSAG family, member 3	6.19079	6.46031	5.48135	0.788763	0.738097	0.946121
202876_s_at	PBX2	pre-B-cell leukemia homeobox 2	7.53147	7.07826	7.25567	0.788766	0.0443876	0.540953
240230_s_at	LOC642826	hypothetical LOC642826	4.72396	4.2608	4.45441	0.788862	0.0114447	0.410766
242457_at	---	---	3.31	2.72387	3.11434	0.7889	0.169323	0.705294
242146_at	SNRPA1	Small nuclear ribonucleoprotein polypeptide A'	4.66195	4.22551	4.37654	0.788925	0.0250148	0.478359
1566146_x_at	---	---	7.90664	7.40643	7.65958	0.788955	0.200991	0.723414
224808_s_at	GET4	golgi to ER traffic protein 4 homolog (S. cerevisiae)	7.04021	6.75969	6.66137	0.788963	0.0496887	0.551727
244356_at	---	---	4.64944	4.13587	4.41076	0.789072	0.0514188	0.556327
231806_s_at	STK36	serine/threonine kinase 36, fused homolog (Drosophila)	5.98493	5.59169	5.67406	0.789082	0.000799081	0.291948
211926_s_at	MYH9	myosin, heavy chain 9, non-muscle	7.85917	7.19653	7.71007	0.789123	0.146085	0.680526
234594_at	NCRNA00203	non-protein coding RNA 203	4.85033	4.39864	4.57471	0.78914	0.00437859	0.369611
244846_at	---	---	3.78085	3.26689	3.54263	0.789155	0.0183992	0.454867
1566323_at	---	---	2.76339	2.39331	2.43917	0.789265	0.00169647	0.32523
205463_s_at	PDGFA	platelet-derived growth factor alpha polypeptide	4.92667	4.53964	4.61264	0.789276	0.055832	0.568338
1558017_s_at	---	---	5.43591	4.86482	5.2327	0.789405	0.0240548	0.473709
213476_x_at	TUBB3	tubulin, beta 3	8.71352	8.46239	8.31845	0.789442	0.0410593	0.535738
219870_at	ATF7IP2	activating transcription factor 7 interacting protein 2	7.04911	6.56155	6.79593	0.789458	0.0528939	0.559582	Feld, Hepatology 2007
216620_s_at	ARHGEF10	Rho guanine nucleotide exchange factor (GEF) 10	5.70708	5.41463	5.33693	0.789485	0.00842739	0.390817
203706_s_at	FZD7	frizzled homolog 7 (Drosophila)	4.27656	3.75635	4.04362	0.789679	0.0663031	0.583542
201591_s_at	NISCH	nischarin	8.54385	8.04889	8.2958	0.789689	0.0145527	0.433674
212520_s_at	SMARCA4	SWI/SNF related, matrix associated, actin dependent regulator of chromatin, subfamily a, member 4	5.80835	5.2547	5.59566	0.789741	0.0669015	0.584694
217525_at	OLFML1	olfactomedin-like 1	6.10314	5.86796	5.69948	0.789777	0.0605099	0.576011
240128_at	---	---	4.16691	3.59101	3.96774	0.789797	0.104757	0.63774
229899_s_at	C20orf199	chromosome 20 open reading frame 199	4.38795	3.89433	4.13965	0.789877	0.0642295	0.57983
227247_at	PLEKHA8	Pleckstrin homology domain containing, family A (phosphoinositide binding specific) member 8	5.71089	5.26816	5.43206	0.789884	0.00331535	0.350689
225655_at	UHRF1	ubiquitin-like with PHD and ring finger domains 1	5.78563	5.33819	5.50982	0.789947	0.116067	0.648783
209763_at	CHRDL1	chordin-like 1	5.41453	4.98101	5.13068	0.790055	0.0462825	0.546206
224156_x_at	IL17RB	interleukin 17 receptor B	8.70017	8.29205	8.40122	0.7901	0.220375	0.740088
210626_at	AKAP1	A kinase (PRKA) anchor protein 1	5.19445	4.72847	4.93039	0.790163	0.00926203	0.397444
209489_at	CELF1	CUGBP, Elav-like family member 1	7.80922	7.27746	7.58463	0.790163	0.0269246	0.486538
228754_at	SLC6A6	solute carrier family 6 (neurotransmitter transporter, taurine), member 6	5.97358	5.55598	5.68057	0.790191	0.137441	0.670478
223358_s_at	PDE7A	phosphodiesterase 7A	4.76638	4.45885	4.40736	0.790199	0.185757	0.715974
213706_at	GPD1	glycerol-3-phosphate dehydrogenase 1 (soluble)	8.30213	8.31118	7.75333	0.790258	0.138989	0.672431
244181_at	---	---	5.42591	4.92524	5.18358	0.790474	0.15158	0.686389
1558409_at	---	---	3.14477	2.66909	2.88762	0.790533	0.0760398	0.600214
242664_at	---	---	3.78103	3.38855	3.47397	0.79054	0.00272853	0.345799
218371_s_at	PSPC1	paraspeckle component 1	6.3536	6.1724	5.91983	0.79056	0.0564409	0.569006
213265_at	PGA3 /// PGA4 /// PGA5	pepsinogen 3, group I (pepsinogen A) /// pepsinogen 4, group I (pepsinogen A) /// pepsinogen 5, group I (pepsinogen A)	5.75818	5.44941	5.40107	0.790604	0.0619218	0.576633
231247_s_at	---	---	4.07585	3.81207	3.69199	0.790683	0.0871006	0.613457
242407_at	---	---	5.93517	5.31821	5.76347	0.790771	0.0508879	0.555278
1559054_a_at	---	---	3.47274	3.12181	3.14147	0.790785	0.000814984	0.291948
204266_s_at	CHKA	choline kinase alpha	6.83136	6.18312	6.67852	0.7908	0.0687989	0.589119
204199_at	RALGPS1	Ral GEF with PH domain and SH3 binding motif 1	4.76508	4.60529	4.31937	0.79087	0.037954	0.524146
226759_at	IKZF4	IKAROS family zinc finger 4 (Eos)	4.71021	4.26725	4.43444	0.790882	0.0108939	0.404478
1558154_at	---	---	6.26961	5.67402	6.08566	0.790962	0.0535575	0.560271
232398_at	CCDC150	coiled-coil domain containing 150	6.1728	6.05885	5.69991	0.790979	0.0453516	0.544418
233198_at	GOLGA2B	golgin A2 family, member B	7.02514	6.42461	6.84425	0.790997	0.0979539	0.62669
204577_s_at	CLUAP1	clusterin associated protein 1	4.78429	4.46566	4.43433	0.79102	0.000799954	0.291948
214298_x_at	40792	septin 6	7.14855	6.71898	6.86527	0.791063	0.175291	0.708505
236814_at	MDM4	Mdm4 p53 binding protein homolog (mouse)	7.38793	6.61701	7.30976	0.791166	0.0994017	0.628337
204820_s_at	BTN3A2 /// BTN3A3	butyrophilin, subfamily 3, member A2 /// butyrophilin, subfamily 3, member A3	9.32969	8.94539	9.0196	0.791182	0.197583	0.722129
200972_at	TSPAN3	tetraspanin 3	8.65721	8.45312	8.23902	0.79119	0.0292192	0.497099
216333_x_at	TNXA /// TNXB	tenascin XA pseudogene /// tenascin XB	6.92403	6.41815	6.68705	0.791235	0.026301	0.484682
215575_at	PDE4DIP	phosphodiesterase 4D interacting protein	3.39869	3.00466	3.0949	0.791338	0.0152436	0.439701
206350_at	APCS	amyloid P component, serum	12.6569	12.2957	12.3338	0.791467	0.0364183	0.517785
220692_at	LOC100286937	similar to HSPC047 protein	5.98693	5.46073	5.76325	0.791618	0.0534629	0.560074
203665_at	HMOX1	heme oxygenase (decycling) 1	8.2464	7.87965	7.92719	0.791664	0.0261277	0.484389
208819_at	RAB8A	RAB8A, member RAS oncogene family	9.34821	9.08714	8.96566	0.791686	0.031303	0.503878
215385_at	---	---	5.4051	4.98292	5.11921	0.791687	0.0777032	0.602273
201160_s_at	CSDA	cold shock domain protein A	7.69999	7.71659	7.15108	0.791771	0.239031	0.750914
242201_at	PMS2L2	postmeiotic segregation increased 2-like 2 pseudogene	5.0631	4.77291	4.69827	0.791773	0.0733825	0.596322
202027_at	TMEM184B	transmembrane protein 184B	6.80007	6.28676	6.56931	0.791842	0.0744638	0.597855
232899_at	FAM41C /// RPL23AP7 /// RPL23AP82	family with sequence similarity 41, member C /// ribosomal protein L23a pseudogene 7 /// ribosomal protein L23a pseudogene 82	7.34953	6.83373	7.12028	0.791845	0.0951584	0.622983
227964_at	FRMD8	FERM domain containing 8	6.8444	6.38238	6.58299	0.791887	0.116049	0.648783
36030_at	IFFO1	intermediate filament family orphan 1	6.71903	6.2806	6.44402	0.792076	0.00276329	0.34665
203607_at	INPP5F	inositol polyphosphate-5-phosphatase F	6.04274	5.70199	5.70935	0.79215	0.0620901	0.576633
230738_at	LOC730631	Hypothetical LOC730631	5.96671	5.3429	5.80316	0.792153	0.113054	0.646999
202766_s_at	FBN1	fibrillin 1	7.06896	6.6275	6.79604	0.792168	0.0433016	0.539378
238108_at	---	---	6.13619	5.67333	5.87616	0.792182	0.027647	0.488487
240033_at	PLG	plasminogen	8.27495	7.57254	8.15889	0.792269	0.165118	0.702367
226051_at	SELM	selenoprotein M	6.2031	5.89396	5.85123	0.79232	0.179607	0.712041
241619_at	CALM1	calmodulin 1 (phosphorylase kinase, delta)	4.09761	3.67443	3.81442	0.792409	0.0357549	0.517316
224081_at	---	---	3.60849	3.14125	3.35178	0.792418	0.210813	0.731954
1565651_at	ARF1	ADP-ribosylation factor 1	5.08963	4.76377	4.74814	0.792437	0.00710169	0.389823
213842_x_at	NSUN5P2	NOP2/Sun domain family, member 5 pseudogene 2	8.39796	7.88165	8.17084	0.792473	0.0317919	0.506151
225949_at	NRBP2	nuclear receptor binding protein 2	8.04261	7.70195	7.71019	0.792506	0.0151854	0.439335
229001_at	PPP1R3E	protein phosphatase 1, regulatory (inhibitor) subunit 3E	6.20004	5.76157	5.92639	0.792535	0.0677273	0.587136
234762_x_at	NLN	Neurolysin (metallopeptidase M3 family)	8.24118	7.73839	8.00665	0.792715	0.0290355	0.495765
219564_at	KCNJ16	potassium inwardly-rectifying channel, subfamily J, member 16	4.52924	3.79275	4.43505	0.792758	0.342894	0.81373
213502_x_at	LOC91316	glucuronidase, beta/immunoglobulin lambda-like polypeptide 1 pseudogene	9.23459	8.47511	9.15423	0.792765	0.327516	0.804217
226164_x_at	RIMKLB	Ribosomal modification protein rimK-like family member B	4.67585	4.03471	4.52458	0.792802	0.0461518	0.546206
230235_at	MCTS1	malignant T cell amplified sequence 1	6.14507	5.70213	5.87494	0.79282	0.0251756	0.479802
204770_at	TAP2	transporter 2, ATP-binding cassette, sub-family B (MDR/TAP)	4.77702	4.47222	4.42402	0.792828	0.0707202	0.591341
201416_at	SOX4	SRY (sex determining region Y)-box 4	5.61207	5.24547	5.29623	0.792852	0.120549	0.654276
228111_s_at	DNAH1	dynein, axonemal, heavy chain 1	5.25835	4.91137	4.93078	0.792866	0.0805953	0.607464
242517_at	KISS1R	KISS1 receptor	3.8726	3.47125	3.57768	0.792878	0.0134104	0.422173
242447_at	C3orf70	chromosome 3 open reading frame 70	5.74099	5.37003	5.42853	0.793113	0.0996871	0.628883
215032_at	RREB1	ras responsive element binding protein 1	5.59193	5.00548	5.40881	0.79313	0.0513153	0.556231
1555074_a_at	KCNH5	potassium voltage-gated channel, subfamily H (eag-related), member 5	4.97159	4.39067	4.7853	0.793184	0.21973	0.739378
209626_s_at	OSBPL3	oxysterol binding protein-like 3	4.10395	3.76502	3.7729	0.793331	0.0624884	0.576633
221904_at	FAM131A	family with sequence similarity 131, member A	6.10618	5.5956	5.87814	0.793341	0.00883671	0.396163
219233_s_at	GSDMB	gasdermin B	7.73527	7.07156	7.59917	0.793359	0.117473	0.650278
225292_at	COL27A1	collagen, type XXVII, alpha 1	7.06768	6.68382	6.76394	0.793453	0.0269635	0.486538
235231_at	ZNF789	zinc finger protein 789	4.60322	4.21067	4.30477	0.793474	0.099318	0.628337
229447_x_at	LOC200030 /// NBPF11 /// NBPF8	neuroblastoma breakpoint family, member 11-like /// neuroblastoma breakpoint family, member 11 /// neuroblastoma breakpoint family, member 8	10.3035	9.83773	10.049	0.793481	0.0156723	0.442115
208978_at	CRIP2	cysteine-rich protein 2	5.91357	5.4395	5.66411	0.793504	0.129452	0.662792
211928_at	DYNC1H1	dynein, cytoplasmic 1, heavy chain 1	8.04541	7.54604	7.81116	0.793513	0.0331651	0.509928
1566257_at	---	---	4.48079	3.80772	4.35079	0.793525	0.156751	0.693095
217610_at	---	---	5.53921	4.76986	5.4674	0.793669	0.219535	0.739104
1569607_s_at	ANKRD20A1 /// ANKRD20A2 /// ANKRD20A3 /// ANKRD20A4 /// ANKRD20A5 /// C21orf81 /// LOC100132733 /// LOC284232 /// LOC644339	ankyrin repeat domain 20 family, member A1 /// ankyrin repeat domain 20 family, member A2 /// ankyrin repeat domain 20 family, member A3 /// ankyrin repeat domain 20 family, member A4 /// ankyrin repeat domain 20 family, member A5 /// ankyrin repeat domain 20 family, member A3 pseudogene /// similar to FLJ00310 protein /// ankyrin repeat domain 20 family, member A2 pseudogene /// similar to ANKRD…	7.2952	6.98526	6.94798	0.793753	0.0456485	0.546046
244310_at	---	---	5.57675	5.15065	5.29939	0.793812	0.112892	0.646998
236167_at	---	---	5.2352	4.61893	5.07197	0.79382	0.0458827	0.546185
214791_at	SP140L	SP140 nuclear body protein-like	6.92154	6.48661	6.65005	0.794006	0.00954014	0.400428
202123_s_at	ABL1	c-abl oncogene 1, receptor tyrosine kinase	7.2678	6.74293	7.05038	0.794042	0.0496042	0.55126
214815_at	TRIM33	tripartite motif-containing 33	4.43126	3.97517	4.17264	0.794065	0.0527204	0.559582
204735_at	PDE4A	phosphodiesterase 4A, cAMP-specific (phosphodiesterase E2 dunce homolog, Drosophila)	5.23122	4.86443	4.91915	0.794109	0.0133878	0.422003
210139_s_at	PMP22	peripheral myelin protein 22	6.18955	5.83669	5.86971	0.794313	0.0453227	0.544418
1563173_at	---	---	2.76296	2.34512	2.48229	0.794376	0.0141648	0.430947
241883_x_at	---	---	5.09041	4.46984	4.93154	0.794428	0.230412	0.746625
232736_s_at	POM121L9P	POM121 membrane glycoprotein-like 9 (rat) pseudogene	5.06237	4.58914	4.81518	0.794457	0.0737171	0.597598
241388_at	---	---	5.80443	5.42315	5.50209	0.794464	0.0351711	0.514628
217118_s_at	C22orf9	chromosome 22 open reading frame 9	7.98291	7.6344	7.66091	0.794466	0.0846674	0.611779
236969_at	---	---	3.82195	3.47577	3.49868	0.794509	0.0370177	0.520044
209331_s_at	MAX	MYC associated factor X	6.47524	6.04986	6.19969	0.794581	0.0339657	0.511296
228023_x_at	AMY2B /// RNPC3	amylase, alpha 2B (pancreatic) /// RNA-binding region (RNP1, RRM) containing 3	7.85469	7.43872	7.57355	0.794602	0.0560656	0.568818
228582_x_at	MALAT1	Metastasis associated lung adenocarcinoma transcript 1 (non-protein coding)	3.14531	2.75233	2.8504	0.794607	0.00261992	0.345799
225018_at	SPIRE1	spire homolog 1 (Drosophila)	4.23372	3.80613	3.95961	0.794619	0.287953	0.783494
243462_s_at	---	---	3.87301	3.40404	3.62377	0.794632	0.0231052	0.472089
1558605_at	---	---	5.10898	4.79017	4.76969	0.794646	0.144194	0.677651
203887_s_at	THBD	thrombomodulin	5.05871	4.78648	4.69151	0.79466	0.183588	0.71455
228040_at	MGC21881	hypothetical locus MGC21881	6.77959	6.18184	6.60775	0.794679	0.0653657	0.580385
211890_x_at	CAPN3	calpain 3, (p94)	6.05522	6.05801	5.52322	0.794737	0.231586	0.747358
211986_at	AHNAK	AHNAK nucleoprotein	8.83289	8.22875	8.66519	0.794784	0.0887755	0.615436
236288_at	RNF34	ring finger protein 34	5.22993	4.75275	4.98629	0.794868	0.0065865	0.389823
219639_x_at	PARP6	poly (ADP-ribose) polymerase family, member 6	7.29131	7.01854	6.92518	0.794917	0.0541435	0.562516
233690_at	---	---	3.85908	3.52833	3.52798	0.795	0.034181	0.511296
236062_at	---	---	5.77716	5.39689	5.47589	0.795046	0.116039	0.648783
221730_at	COL5A2	collagen, type V, alpha 2	6.03014	5.64332	5.73312	0.795153	0.10953	0.64343
221577_x_at	GDF15 /// LOC100292463	growth differentiation factor 15 /// similar to growth differentiation factor 15	5.5093	5.35664	5.07206	0.795247	0.0597295	0.57409
243450_at	---	---	4.34288	3.98586	4.02851	0.795334	0.0132562	0.420922
1563057_at	---	---	3.95853	3.60236	3.6437	0.795355	0.00360892	0.356345
219559_at	SLC17A9	solute carrier family 17, member 9	8.10119	7.70151	7.81251	0.79537	0.00361914	0.356345
237625_s_at	---	---	3.51548	2.95825	3.3214	0.795392	0.13101	0.66507
201843_s_at	EFEMP1	EGF-containing fibulin-like extracellular matrix protein 1	3.4862	3.16516	3.15059	0.795456	0.103393	0.636527
242391_at	---	---	5.14862	4.59079	4.9552	0.795492	0.110145	0.643745
213726_x_at	TUBB2C	tubulin, beta 2C	9.28594	8.99758	8.93092	0.795523	0.0306756	0.501769
217712_at	---	---	3.15812	2.77248	2.86165	0.795588	0.16214	0.699278
1559550_s_at	---	---	4.50249	4.10743	4.21168	0.795593	0.00391477	0.361852
202450_s_at	CTSK	cathepsin K	7.03401	6.66223	6.72965	0.795736	0.0262045	0.48447
216278_at	---	---	3.49979	3.03666	3.25032	0.79576	0.0427029	0.53906
230970_at	---	---	3.24547	2.76059	3.00907	0.795767	0.0566521	0.569188
201598_s_at	INPPL1	inositol polyphosphate phosphatase-like 1	6.88653	6.48456	6.60055	0.795827	0.00105729	0.293685
227867_at	C2orf89	chromosome 2 open reading frame 89	5.79376	5.4651	5.46427	0.795991	0.0226377	0.471035
1570507_at	SFRS2IP	Splicing factor, arginine/serine-rich 2, interacting protein	3.2339	2.7868	2.97549	0.795992	0.00689325	0.389823
219255_x_at	IL17RB	interleukin 17 receptor B	8.84143	8.41225	8.57241	0.796044	0.254178	0.761482
210609_s_at	TP53I3	tumor protein p53 inducible protein 3	6.84995	6.64009	6.44939	0.796062	0.0358958	0.517316
214091_s_at	GPX3	glutathione peroxidase 3 (plasma)	9.53991	9.20232	9.21602	0.796074	0.157157	0.693654
222358_x_at	---	---	5.67144	5.19754	5.42935	0.796077	0.0124731	0.415761
230711_at	---	---	4.48585	4.13983	4.16725	0.796153	0.0493785	0.551123
1553185_at	RASEF	RAS and EF-hand domain containing	10.8627	10.2946	10.6775	0.796216	0.223443	0.741827
38241_at	BTN3A3	butyrophilin, subfamily 3, member A3	6.28497	5.97038	5.94775	0.796235	0.479207	0.870795
244753_at	---	---	5.57529	4.93404	5.43411	0.796252	0.0826623	0.608785
218599_at	REC8	REC8 homolog (yeast)	5.89194	5.63004	5.52318	0.796258	0.0274319	0.488487
221989_at	RPL10	ribosomal protein L10	7.20239	6.8358	6.89661	0.796318	0.00523942	0.384042
203944_x_at	BTN2A1	butyrophilin, subfamily 2, member A1	6.73618	6.29102	6.47782	0.796415	0.0126973	0.41645
230769_at	DENND2C	DENN/MADD domain containing 2C	6.6468	6.34672	6.3014	0.796418	0.0106505	0.404478
208154_at	---	---	4.15289	3.72465	3.88455	0.796471	0.00696998	0.389823
1553693_s_at	CBR4	carbonyl reductase 4	5.99103	5.50392	5.75804	0.796485	0.158343	0.695457
1555446_s_at	TRAPPC10	trafficking protein particle complex 10	5.81501	5.30877	5.59353	0.796496	0.0335391	0.510194
238106_at	---	---	6.90456	6.56961	6.58037	0.796516	0.108397	0.641898
238988_at	---	---	4.92342	4.55905	4.61695	0.796543	0.0473517	0.548575
236314_at	EPM2AIP1	EPM2A (laforin) interacting protein 1	5.59664	5.19027	5.31567	0.796643	0.00966016	0.401911
1561153_at	---	---	4.85402	4.54626	4.5139	0.796645	0.00214051	0.333109
218015_s_at	WRNIP1	Werner helicase interacting protein 1	5.22773	4.73492	4.99873	0.796678	0.0833802	0.609068
230252_at	LPAR5	lysophosphatidic acid receptor 5	5.40968	5.05078	5.10035	0.796684	0.164117	0.70115
1554595_at	SYMPK	symplekin	6.5028	5.97806	6.29313	0.796742	0.0175714	0.453205
234609_at	---	---	5.00591	4.56915	4.74356	0.796777	0.0221944	0.471035
233995_at	---	---	4.08531	3.80347	3.73027	0.796866	0.0502127	0.552451
211034_s_at	C12orf51	chromosome 12 open reading frame 51	6.88347	6.34038	6.68529	0.796904	0.050202	0.552451
1557512_at	---	---	4.09711	3.65898	3.83595	0.796907	0.0786477	0.604074
1556595_at	---	---	3.86369	3.37045	3.63567	0.796934	0.0757485	0.600214
216840_s_at	LAMA2	laminin, alpha 2	5.39963	4.93867	5.15229	0.796945	0.0477985	0.549659
209035_at	MDK	midkine (neurite growth-promoting factor 2)	6.61838	6.33628	6.26387	0.796997	0.0964104	0.624425
243386_at	CASZ1	castor zinc finger 1	3.63396	3.21332	3.36272	0.797048	0.0454945	0.545008
224710_at	RAB34	RAB34, member RAS oncogene family	6.2109	5.88186	5.88475	0.797063	0.0270778	0.487099
214989_x_at	---	---	6.50979	6.08768	6.23973	0.797149	0.028841	0.494918
230737_s_at	LOC387647	patched domain containing 3 pseudogene	3.96553	3.68709	3.60932	0.797165	0.0258104	0.483321
224724_at	SULF2	sulfatase 2	8.3155	8.14853	7.89245	0.797186	0.260628	0.767265
208623_s_at	EZR	ezrin	7.18616	6.85629	6.86094	0.79721	0.210686	0.731954
213546_at	DKFZP586I1420	hypothetical protein DKFZp586I1420	7.06834	6.72537	6.75106	0.79724	0.0268812	0.486538
234650_at	---	---	3.35777	2.95886	3.07416	0.797277	0.0324859	0.509875
242060_x_at	PHF11	PHD finger protein 11	4.23706	3.78451	3.98574	0.797311	0.022499	0.471035
239799_at	C9orf130	chromosome 9 open reading frame 130	4.12019	3.78025	3.80136	0.79733	0.00637162	0.389823
221879_at	CALML4	calmodulin-like 4	7.86598	7.64289	7.47709	0.797351	0.126957	0.659792
243162_at	---	---	3.03649	2.55447	2.80311	0.797402	0.00643316	0.389823
243233_at	---	---	5.49815	5.03437	5.25383	0.797403	0.0287595	0.494513
209154_at	TAX1BP3	Tax1 (human T-cell leukemia virus type I) binding protein 3	7.98766	7.7409	7.61315	0.797408	0.00975194	0.401911
1558802_at	---	---	3.53194	3.04724	3.30052	0.797526	0.0599024	0.574665
211454_x_at	FKSG49	FKSG49	9.90031	9.4228	9.66465	0.79755	0.0932884	0.621547
206666_at	GZMK	granzyme K (granzyme 3; tryptase II)	7.22056	6.90783	6.88659	0.797741	0.268768	0.771122
55872_at	ZNF512B	zinc finger protein 512B	7.78093	7.14896	7.63853	0.797752	0.247366	0.757464
1558458_at	LOC401320	Hypothetical LOC401320	4.61376	4.31101	4.27383	0.797754	0.00832422	0.390817
201195_s_at	SLC7A5	solute carrier family 7 (cationic amino acid transporter, y+ system), member 5	6.83294	6.61578	6.44206	0.797893	0.028683	0.494266
238656_at	---	---	5.50853	5.05377	5.26023	0.797898	0.00879269	0.396163
81811_at	---	---	6.42797	5.87091	6.24124	0.797961	0.0188358	0.455807
243008_at	---	---	5.73492	5.36511	5.43589	0.797979	0.208729	0.730826
212197_x_at	MPRIP	myosin phosphatase Rho interacting protein	8.52147	8.18287	8.20379	0.798011	0.00783855	0.389823
1557239_at	BBX	bobby sox homolog (Drosophila)	3.12216	2.70578	2.85123	0.798038	0.0492995	0.551123
242384_at	---	---	4.64988	4.22214	4.3858	0.798045	0.0239138	0.473486
227228_s_at	CCDC88C	coiled-coil domain containing 88C	5.20019	4.67681	4.99362	0.79809	0.0330371	0.509928
200907_s_at	PALLD	palladin, cytoskeletal associated protein	6.66898	6.29169	6.37479	0.798106	0.173391	0.707488
226134_s_at	---	---	5.66605	5.33322	5.34526	0.79813	0.0621364	0.576633
244298_at	---	---	4.45681	4.10957	4.14504	0.798254	0.0827098	0.608785
1557749_at	EHBP1L1	EH domain binding protein 1-like 1	4.53719	4.03934	4.31612	0.798373	0.106593	0.639565
1565762_at	---	---	4.74377	4.42541	4.41517	0.79843	0.0770842	0.601318
202201_at	BLVRB	biliverdin reductase B (flavin reductase (NADPH))	10.2744	9.87707	9.99326	0.798475	0.0325331	0.509875
213428_s_at	COL6A1	collagen, type VI, alpha 1	8.09098	7.45789	7.9514	0.798498	0.173763	0.707488
201236_s_at	BTG2	BTG family, member 2	7.11688	6.77477	6.80274	0.798503	0.0563096	0.569006
239841_at	---	---	5.03573	4.59133	4.78316	0.798571	0.00891092	0.396163
203802_x_at	NSUN5	NOP2/Sun domain family, member 5	6.98706	6.58858	6.70696	0.798577	0.00517254	0.383351
219359_at	ATHL1	ATH1, acid trehalase-like 1 (yeast)	6.28984	5.84305	6.03874	0.798585	0.0293845	0.497099
212124_at	ZMIZ1	zinc finger, MIZ-type containing 1	7.65059	7.15191	7.43074	0.798628	0.18743	0.716673
212776_s_at	OBSL1	obscurin-like 1	6.50333	6.06571	6.24691	0.798647	0.0564976	0.569106
239246_at	FARP1	FERM, RhoGEF (ARHGEF) and pleckstrin domain protein 1 (chondrocyte-derived)	5.76563	5.26312	5.54893	0.798916	0.0449056	0.542423
217639_at	---	---	5.85357	5.43078	5.58907	0.79893	0.161875	0.698981
232463_at	NCRNA00107	non-protein coding RNA 107	5.71902	5.36006	5.41656	0.799043	0.00484888	0.374434
241867_at	---	---	4.52483	4.25989	4.16637	0.79919	0.0154282	0.439951
221833_at	LONP2	Lon peptidase 2, peroxisomal	7.82559	7.3822	7.5742	0.799192	0.184332	0.715342
227746_at	ELAVL1	ELAV (embryonic lethal, abnormal vision, Drosophila)-like 1 (Hu antigen R)	5.13603	4.70934	4.87468	0.799212	0.0486845	0.550318
221566_s_at	NOL3	nucleolar protein 3 (apoptosis repressor with CARD domain)	5.46694	5.15722	5.1356	0.799275	0.115632	0.648783
217258_x_at	IGLV1-44 /// LOC100290557	immunoglobulin lambda variable 1-44 /// similar to hCG91935	5.91992	5.11629	5.88511	0.799342	0.453599	0.860004
235537_at	OCIAD1	OCIA domain containing 1	5.75934	5.30891	5.51273	0.799384	0.00896885	0.396163
239435_x_at	SHROOM1	shroom family member 1	8.69003	8.31768	8.39674	0.79944	0.0208927	0.463112
238970_at	---	---	4.49955	4.05299	4.25081	0.799445	0.0147053	0.434997
213247_at	SVEP1	sushi, von Willebrand factor type A, EGF and pentraxin domain containing 1	6.36238	6.0287	6.04596	0.799466	0.0339433	0.511296
231174_s_at	---	---	5.76862	5.2912	5.53865	0.79954	0.152963	0.688069
215605_at	NCOA2	Nuclear receptor coactivator 2	5.79832	5.45261	5.48938	0.799553	0.0423441	0.538472
230498_at	MCHR1	melanin-concentrating hormone receptor 1	5.45747	5.10075	5.15515	0.79956	0.0114122	0.410766
238812_at	---	---	6.53664	6.17819	6.23547	0.799601	0.0397727	0.530396
243598_at	---	---	3.5808	3.26489	3.25424	0.799644	0.0124982	0.415967
215483_at	AKAP9	A kinase (PRKA) anchor protein (yotiao) 9	6.2061	5.82697	5.91758	0.799685	0.210562	0.731829
214373_at	---	---	5.76717	5.34305	5.50565	0.799686	0.0509408	0.555278
1557684_at	ZNF286A	zinc finger protein 286A	4.47001	4.14698	4.14785	0.799693	0.0168467	0.448813
235782_at	---	---	4.86007	4.51833	4.54974	0.799896	0.0160173	0.446004
207760_s_at	NCOR2	nuclear receptor co-repressor 2	7.6465	7.08906	7.46569	0.799937	0.171719	0.706559
242287_at	CLIP1	CAP-GLY domain containing linker protein 1	4.26122	3.7803	4.03487	0.800061	0.0273852	0.488487
243091_at	---	---	4.79867	4.41354	4.51491	0.800082	0.0245273	0.476407
59625_at	NOL3	nucleolar protein 3 (apoptosis repressor with CARD domain)	5.65592	5.16444	5.43596	0.800086	0.161059	0.698544
239251_at	---	---	5.96648	5.62324	5.65774	0.800137	0.00842906	0.390817
201348_at	GPX3	glutathione peroxidase 3 (plasma)	10.4692	10.0925	10.1806	0.800151	0.164032	0.70115
224451_x_at	ARHGAP9	Rho GTPase activating protein 9	6.6198	6.28629	6.3055	0.800237	0.209137	0.730826
237594_at	---	---	5.21812	4.74875	4.98547	0.800283	0.0593167	0.572736
207961_x_at	MYH11	myosin, heavy chain 11, smooth muscle	6.38395	5.91058	6.15375	0.800302	0.375998	0.830942
232266_x_at	CDK13	Cyclin-dependent kinase 13	7.70976	7.31688	7.43144	0.800358	0.0230617	0.472089
214833_at	TMEM63A	transmembrane protein 63A	6.03685	5.57479	5.80014	0.800393	0.0142623	0.431198
218920_at	FAM193B	family with sequence similarity 193, member B	7.66181	7.38372	7.31481	0.800428	0.0732529	0.596322
216115_at	NF1	neurofibromin 1	4.74417	4.37214	4.45355	0.800433	0.0164091	0.448166
217239_x_at	---	---	3.97489	3.66205	3.64877	0.800437	0.0785754	0.604074
244697_at	---	---	5.78447	4.77696	5.87537	0.800508	0.386598	0.834519
236067_at	---	---	5.61753	5.18629	5.36271	0.800525	0.053962	0.562265
220390_at	AGBL2	ATP/GTP binding protein-like 2	5.7571	5.22854	5.56101	0.800644	0.199534	0.723414
208284_x_at	GGT1	gamma-glutamyltransferase 1	7.12188	6.88523	6.75066	0.80065	0.0861396	0.611779
216209_at	LOC400084	hypothetical gene supported by AK057632; AL137270; BC057846	5.21832	4.8402	4.93203	0.800667	0.0528274	0.559582
1570198_x_at	---	---	6.47427	6.08071	6.19727	0.800672	0.0348312	0.512662
232264_at	---	---	4.43271	4.24716	4.03134	0.800829	0.0199782	0.460314
213261_at	TRANK1	tetratricopeptide repeat and ankyrin repeat containing 1	6.48421	6.09529	6.20503	0.800888	0.0794292	0.605095
234118_at	---	---	4.81442	4.31466	4.60208	0.801003	0.203858	0.725888
1556474_a_at	FLJ38379	hypothetical FLJ38379	4.07152	3.77556	3.73726	0.801126	0.111276	0.644488
237504_at	INTS10	integrator complex subunit 10	4.91927	4.57376	4.615	0.801216	0.0457485	0.546185
205054_at	NEB	nebulin	5.06769	5.03567	4.57541	0.801247	0.659404	0.926889
210210_at	MPZL1	myelin protein zero-like 1	5.00744	4.54433	4.77392	0.801281	0.0108668	0.404478
228670_at	TEP1	telomerase-associated protein 1	5.97087	5.53569	5.72084	0.801369	0.0582138	0.571204
242751_at	---	---	6.34135	5.82854	6.13796	0.801389	0.335254	0.809666
224213_at	C14orf91	chromosome 14 open reading frame 91	3.40924	3.05634	3.11012	0.801464	0.0520156	0.556567
213361_at	TDRD7	tudor domain containing 7	7.27561	6.99726	6.93179	0.801471	0.164567	0.701511
239223_s_at	FBXL20	F-box and leucine-rich repeat protein 20	4.3737	4.06901	4.04573	0.801489	0.0112443	0.410308
232528_at	---	---	5.0821	4.71778	4.78992	0.801499	0.119957	0.653697
202311_s_at	COL1A1	collagen, type I, alpha 1	2.90634	2.5259	2.62407	0.801581	0.00410869	0.363673
201957_at	PPP1R12B	protein phosphatase 1, regulatory (inhibitor) subunit 12B	6.96613	6.51547	6.72608	0.801612	0.0172477	0.451213
221499_s_at	STX16	syntaxin 16	7.45075	7.08705	7.15917	0.801835	0.00944772	0.398507
204769_s_at	TAP2	transporter 2, ATP-binding cassette, sub-family B (MDR/TAP)	6.72876	6.23043	6.51804	0.801862	0.312904	0.796552
229111_at	---	---	6.27497	5.6474	6.14203	0.801944	0.121873	0.655614
237225_at	---	---	2.72204	2.22272	2.51215	0.801946	0.0181728	0.453205
1558331_at	SIRT2	Sirtuin (silent mating type information regulation 2 homolog) 2 (S. cerevisiae)	4.24065	3.83023	3.97759	0.802003	0.0149621	0.43732
232565_at	---	---	3.9744	3.55183	3.71881	0.80207	0.0190204	0.457278
228696_at	SLC45A3	solute carrier family 45, member 3	6.48663	5.98908	6.27638	0.802184	0.206852	0.728739
1563509_at	---	---	6.00121	5.64163	5.70846	0.802287	0.0124554	0.415577
223660_at	ADORA3	adenosine A3 receptor	5.6401	5.54918	5.18622	0.80231	0.459175	0.862101
224806_at	TRIM25	tripartite motif-containing 25	8.51912	8.03067	8.30377	0.802314	0.131694	0.665678
232876_at	---	---	4.1115	3.62895	3.89264	0.802322	0.0228121	0.472089
228730_s_at	SCRN2	secernin 2	8.17113	7.72246	7.93213	0.802387	0.0208002	0.463112
236869_at	---	---	4.65403	4.14529	4.45107	0.802388	0.0168212	0.448813
1560264_at	---	---	3.56477	2.92981	3.4376	0.802406	0.0688796	0.589514
225502_at	DOCK8	dedicator of cytokinesis 8	6.35124	6.04458	6.02715	0.802431	0.36571	0.826377
1557383_a_at	---	---	5.05247	4.76893	4.71474	0.80251	0.249219	0.758248
244871_s_at	USP32	ubiquitin specific peptidase 32	4.98079	4.41349	4.81334	0.802517	0.104414	0.63748
239297_at	C8orf79	chromosome 8 open reading frame 79	4.65077	4.28114	4.36479	0.80254	0.0036711	0.359232
223565_at	MGC29506	plasma cell-induced ER protein 1	4.88455	4.17582	4.80214	0.802581	0.474394	0.868499
242156_at	---	---	3.91085	3.51788	3.63911	0.802626	0.0834023	0.609068
205862_at	GREB1	growth regulation by estrogen in breast cancer 1	3.88773	3.36398	3.69452	0.802647	0.109635	0.643542
204304_s_at	PROM1	prominin 1	4.44569	3.6913	4.39124	0.80278	0.384438	0.833272
225119_at	CHMP4B	chromatin modifying protein 4B	6.48991	5.97071	6.2946	0.802866	0.167264	0.703636
1561937_x_at	---	---	7.3815	6.8892	7.17005	0.802869	0.140792	0.674347
235589_s_at	MDM4	Mdm4 p53 binding protein homolog (mouse)	5.04781	4.68335	4.75968	0.802875	0.15977	0.697186
213001_at	ANGPTL2	angiopoietin-like 2	6.21939	5.84792	5.93554	0.802897	0.053262	0.559885
228655_at	---	---	4.65318	4.3451	4.33141	0.802939	0.0461129	0.546206
241786_at	---	---	4.38775	3.73072	4.27536	0.802941	0.278054	0.77664
225786_at	NCRNA00201	non-protein coding RNA 201	6.81618	6.39809	6.5605	0.802971	0.0857376	0.611779
242974_at	CD47	CD47 molecule	4.62473	4.24918	4.34364	0.803007	0.0077118	0.389823
[truncated: 32,170 more rows]
